# Supplementary material for: Seed protein content and its relationships with agronomic traits in pigeonpea is controlled by both main and epistatic effects QTLs
Source: PubMed Central journal article supplement (PMC6959250; doi:10.1038/s41598-019-56903-z), 2020-01-14

## Supplementary Information

### Seed protein content and its relationships with agronomic traits in pigeonpea is controlled by both main and epistatic effects QTLs

Jimmy Obala<sup>1,2</sup>, Rachit K. Saxena<sup>1</sup>, Vikas K. Singh<sup>1</sup>, Sandip M. Kale<sup>1</sup>, Vanika Garg<sup>1</sup>, C. V. Sameer Kumar<sup>3</sup>, K. B. Saxena<sup>4</sup>, Pangirayi Tongoona<sup>2</sup>, Julia Sibiya<sup>2</sup>, Rajeev K. Varshney<sup>1,\*</sup>

<sup>1</sup>International Crops Research Institute for the Semi-Arid Tropics (ICRISAT), Hyderabad, 502324, India

<sup>2</sup>University of KwaZulu-Natal, African Center for Crop Improvement, Scottsville, 3209 Pietermaritzburg, South Africa

<sup>3</sup>Professor Jayashankar Telangana State Agricultural University, Rajendranagar, Hyderabad-500030, Telangana, India

<sup>4</sup>Former Principal Scientist, ICRISAT, Present address: 17, NMC Housing, Al Ain, Abu Dhabi

\*Email address for correspondence: [r.k.varshney@cgiar.org](mailto:r.k.varshney@cgiar.org)

**Supplementary Table S1.** Sequence data generated using genotyping-by-sequencing of parental lines and F<sub>2</sub> individuals of five pigeonpea mapping population

| Pop1 (ICP 11605 × ICP 14209) |                     |           |           |                     |           |
|------------------------------|---------------------|-----------|-----------|---------------------|-----------|
| Sample ID                    | No. reads (Million) | Data (Gb) | Sample ID | No. reads (Million) | Data (Gb) |
| Parents                      |                     |           | 18        | 5.17                | 0.52      |
| ICP 11605 (P <sub>1</sub> )  | 1.13                | 0.11      | 19        | 2.95                | 0.30      |
| ICP 14209 (P <sub>2</sub> )  | 2.60                | 0.26      | 20        | 3.95                | 0.40      |
| F <sub>2</sub>               |                     |           | 21        | 2.22                | 0.22      |
| 1                            | 3.57                | 0.36      | 22        | 2.30                | 0.23      |
| 2                            | 3.36                | 0.34      | 23        | 3.10                | 0.31      |
| 3                            | 5.82                | 0.59      | 24        | 2.91                | 0.29      |
| 4                            | 4.03                | 0.41      | 25        | 3.30                | 0.33      |
| 5                            | 2.57                | 0.26      | 26        | 1.82                | 0.18      |
| 6                            | 2.98                | 0.30      | 27        | 1.93                | 0.19      |
| 7                            | 3.76                | 0.38      | 28        | 3.01                | 0.30      |
| 8                            | 3.42                | 0.35      | 29        | 1.94                | 0.20      |
| 9                            | 1.99                | 0.20      | 30        | 3.67                | 0.37      |
| 10                           | 2.28                | 0.23      | 31        | 2.16                | 0.22      |
| 11                           | 3.74                | 0.38      | 33        | 2.93                | 0.30      |
| 12                           | 2.26                | 0.23      | 34        | 2.28                | 0.23      |
| 13                           | 2.96                | 0.30      | 35        | 1.53                | 0.15      |
| 14                           | 2.34                | 0.24      | 36        | 1.76                | 0.18      |
| 15                           | 1.92                | 0.19      | 37        | 3.03                | 0.31      |
| 16                           | 3.04                | 0.31      | 38        | 1.73                | 0.17      |
| 17                           | 2.30                | 0.23      | 39        | 3.00                | 0.30      |

**Supplementary Table S1 (continued)**

| Pop1 (ICP 11605 × ICP 14209) |                     |           |           |                     |           |
|------------------------------|---------------------|-----------|-----------|---------------------|-----------|
| Sample ID                    | No. reads (Million) | Data (Gb) | Sample ID | No. reads (Million) | Data (Gb) |
| 40                           | 2.14                | 0.22      | 78        | 1.54                | 0.16      |
| 41                           | 2.53                | 0.26      | 79        | 1.68                | 0.17      |
| 42                           | 1.80                | 0.18      | 80        | 1.62                | 0.16      |
| 43                           | 2.74                | 0.28      | 81        | 3.00                | 0.30      |
| 44                           | 1.69                | 0.17      | 82        | 3.31                | 0.33      |
| 45                           | 2.76                | 0.28      | 83        | 2.44                | 0.25      |
| 46                           | 2.96                | 0.30      | 84        | 2.29                | 0.23      |
| 47                           | 2.49                | 0.25      | 85        | 0.79                | 0.08      |
| 48                           | 2.78                | 0.28      | 86        | 1.21                | 0.12      |
| 49                           | 2.22                | 0.22      | 87        | 1.01                | 0.10      |
| 50                           | 4.17                | 0.42      | 88        | 1.52                | 0.15      |
| 51                           | 2.31                | 0.23      | 89        | 1.11                | 0.11      |
| 52                           | 2.69                | 0.27      | 95        | 2.32                | 0.23      |
| 53                           | 3.28                | 0.33      | 96        | 1.68                | 0.17      |
| 54                           | 2.50                | 0.25      | 97        | 3.13                | 0.32      |
| 55                           | 2.43                | 0.25      | 98        | 2.90                | 0.29      |
| 56                           | 1.97                | 0.20      | 99        | 1.90                | 0.19      |
| 57                           | 2.40                | 0.24      | 100       | 2.55                | 0.26      |
| 58                           | 1.64                | 0.17      | 101       | 2.38                | 0.24      |
| 59                           | 1.45                | 0.15      | 102       | 3.18                | 0.32      |
| 60                           | 2.27                | 0.23      | 103       | 1.51                | 0.15      |
| 61                           | 4.74                | 0.48      | 104       | 2.34                | 0.24      |
| 62                           | 1.82                | 0.18      | 105       | 1.59                | 0.16      |
| 63                           | 2.39                | 0.24      | 106       | 1.43                | 0.14      |
| 64                           | 2.11                | 0.21      | 107       | 1.92                | 0.19      |
| 65                           | 2.12                | 0.21      | 108       | 1.74                | 0.18      |
| 66                           | 2.14                | 0.22      | 109       | 1.15                | 0.12      |
| 67                           | 1.89                | 0.19      | 110       | 2.24                | 0.23      |
| 68                           | 2.47                | 0.25      | 111       | 2.53                | 0.26      |
| 69                           | 3.17                | 0.32      | 112       | 2.01                | 0.20      |
| 70                           | 1.92                | 0.19      | 113       | 1.77                | 0.18      |
| 71                           | 2.45                | 0.25      | 114       | 2.85                | 0.29      |
| 72                           | 2.28                | 0.23      | 115       | 2.41                | 0.24      |
| 73                           | 2.13                | 0.22      | 116       | 1.90                | 0.19      |
| 74                           | 1.20                | 0.12      | 117       | 2.46                | 0.25      |
| 75                           | 1.57                | 0.16      | 118       | 1.76                | 0.18      |
| 76                           | 2.11                | 0.21      | 119       | 2.02                | 0.20      |
| 77                           | 1.94                | 0.20      | 120       | 1.27                | 0.13      |

**Supplementary Table S1 (continued)**

| Pop1 (ICP 11605 × ICP 14209) |                     |           |                        |                     |           |
|------------------------------|---------------------|-----------|------------------------|---------------------|-----------|
| Sample ID                    | No. reads (Million) | Data (Gb) | Sample ID              | No. reads (Million) | Data (Gb) |
| 121                          | 1.30                | 0.13      | 159                    | 1.90                | 0.19      |
| 122                          | 1.65                | 0.17      | 160                    | 1.13                | 0.11      |
| 123                          | 1.11                | 0.11      | 161                    | 1.68                | 0.17      |
| 124                          | 2.28                | 0.23      | 162                    | 1.72                | 0.17      |
| 125                          | 1.06                | 0.11      | 163                    | 2.52                | 0.25      |
| 126                          | 1.03                | 0.10      | 164                    | 1.14                | 0.11      |
| 127                          | 1.82                | 0.18      | 165                    | 2.17                | 0.22      |
| 128                          | 1.82                | 0.18      | 166                    | 2.29                | 0.23      |
| 129                          | 1.11                | 0.11      | 167                    | 1.27                | 0.13      |
| 130                          | 1.26                | 0.13      | 168                    | 1.11                | 0.11      |
| 131                          | 2.25                | 0.23      | 169                    | 1.48                | 0.15      |
| 132                          | 1.89                | 0.19      | 170                    | 2.88                | 0.29      |
| 133                          | 2.32                | 0.23      | 172                    | 1.40                | 0.14      |
| 134                          | 2.54                | 0.26      | 175                    | 1.46                | 0.15      |
| 135                          | 3.58                | 0.36      | 176                    | 1.70                | 0.17      |
| 136                          | 2.13                | 0.21      | 177                    | 1.35                | 0.14      |
| 137                          | 2.59                | 0.26      | 178                    | 1.57                | 0.16      |
| 138                          | 3.29                | 0.33      | 180                    | 1.23                | 0.12      |
| 139                          | 2.96                | 0.30      | 181                    | 1.48                | 0.15      |
| 140                          | 3.09                | 0.31      | 182                    | 2.82                | 0.29      |
| 141                          | 1.66                | 0.17      | 183                    | 1.33                | 0.13      |
| 142                          | 2.89                | 0.29      | 184                    | 0.83                | 0.08      |
| 143                          | 1.66                | 0.17      | 185                    | 1.41                | 0.14      |
| 144                          | 3.28                | 0.33      | 186                    | 2.18                | 0.22      |
| 145                          | 2.18                | 0.22      | 187                    | 0.92                | 0.09      |
| 146                          | 4.01                | 0.40      | 188                    | 1.58                | 0.16      |
| 147                          | 2.93                | 0.30      | F <sub>2</sub> total   | 399.93              | 40.40     |
| 148                          | 2.10                | 0.21      | F <sub>2</sub> average | 2.25                | 0.23      |
| 149                          | 2.41                | 0.24      |                        |                     |           |
| 150                          | 2.17                | 0.22      |                        |                     |           |
| 151                          | 1.64                | 0.17      |                        |                     |           |
| 152                          | 1.19                | 0.12      |                        |                     |           |
| 153                          | 1.10                | 0.11      |                        |                     |           |
| 154                          | 2.19                | 0.22      |                        |                     |           |
| 155                          | 1.78                | 0.18      |                        |                     |           |
| 156                          | 1.57                | 0.16      |                        |                     |           |
| 157                          | 2.39                | 0.24      |                        |                     |           |
| 158                          | 3.96                | 0.40      |                        |                     |           |

**Supplementary Table S1 (continued)**

| Pop2 (ICP 8863 × ICP 11605) |                     |           |           |                     |           |
|-----------------------------|---------------------|-----------|-----------|---------------------|-----------|
| Sample ID                   | No. reads (Million) | Data (Gb) | Sample ID | No. reads (Million) | Data (Gb) |
| Parents                     |                     |           | 36        | 1.82                | 0.18      |
| ICP 8863 (P <sub>1</sub> )  | 3.00                | 0.30      | 37        | 2.32                | 0.23      |
| ICP 11605 (P <sub>2</sub> ) | 7.59                | 0.77      | 39        | 0.69                | 0.07      |
| F <sub>2</sub>              |                     |           | 40        | 1.33                | 0.13      |
| 1                           | 3.68                | 0.37      | 42        | 0.98                | 0.10      |
| 2                           | 1.53                | 0.15      | 44        | 1.24                | 0.13      |
| 3                           | 3.75                | 0.38      | 45        | 0.79                | 0.08      |
| 4                           | 3.33                | 0.34      | 46        | 0.81                | 0.08      |
| 5                           | 1.80                | 0.18      | 47        | 0.74                | 0.07      |
| 6                           | 3.12                | 0.31      | 49        | 0.76                | 0.08      |
| 7                           | 3.57                | 0.36      | 52        | 0.80                | 0.08      |
| 8                           | 5.44                | 0.55      | 53        | 1.40                | 0.14      |
| 9                           | 1.44                | 0.15      | 54        | 1.50                | 0.15      |
| 10                          | 1.36                | 0.14      | 55        | 1.48                | 0.15      |
| 11                          | 3.66                | 0.37      | 56        | 1.62                | 0.16      |
| 12                          | 1.74                | 0.18      | 57        | 2.76                | 0.28      |
| 13                          | 6.71                | 0.68      | 58        | 1.52                | 0.15      |
| 14                          | 5.22                | 0.53      | 59        | 1.14                | 0.11      |
| 15                          | 0.65                | 0.07      | 60        | 1.62                | 0.16      |
| 16                          | 1.84                | 0.19      | 61        | 2.47                | 0.25      |
| 17                          | 2.54                | 0.26      | 62        | 1.69                | 0.17      |
| 18                          | 3.44                | 0.35      | 63        | 1.29                | 0.13      |
| 19                          | 2.04                | 0.21      | 64        | 0.75                | 0.08      |
| 20                          | 9.52                | 0.96      | 65        | 1.95                | 0.20      |
| 21                          | 1.25                | 0.13      | 66        | 2.24                | 0.23      |
| 22                          | 2.41                | 0.24      | 67        | 1.91                | 0.19      |
| 23                          | 2.17                | 0.22      | 68        | 0.90                | 0.09      |
| 24                          | 1.98                | 0.20      | 69        | 2.47                | 0.25      |
| 25                          | 1.43                | 0.14      | 70        | 4.31                | 0.43      |
| 26                          | 1.40                | 0.14      | 71        | 1.44                | 0.14      |
| 27                          | 2.38                | 0.24      | 72        | 1.74                | 0.18      |
| 28                          | 3.04                | 0.31      | 73        | 0.86                | 0.09      |
| 29                          | 0.96                | 0.10      | 74        | 4.69                | 0.47      |
| 30                          | 1.34                | 0.14      | 75        | 0.78                | 0.08      |
| 31                          | 1.09                | 0.11      | 76        | 3.37                | 0.34      |
| 33                          | 1.95                | 0.20      | 77        | 1.58                | 0.16      |
| 34                          | 2.13                | 0.21      | 78        | 2.97                | 0.30      |
| 35                          | 1.85                | 0.19      | 79        | 0.86                | 0.09      |

**Supplementary Table S1 (continued)**

| Pop2 (ICP 8863 × ICP 11605) |                     |           |           |                     |           |
|-----------------------------|---------------------|-----------|-----------|---------------------|-----------|
| Sample ID                   | No. reads (Million) | Data (Gb) | Sample ID | No. reads (Million) | Data (Gb) |
| 80                          | 1.15                | 0.12      | 119       | 3.80                | 0.38      |
| 81                          | 4.03                | 0.41      | 121       | 1.53                | 0.15      |
| 82                          | 2.58                | 0.26      | 122       | 3.23                | 0.33      |
| 83                          | 1.04                | 0.11      | 123       | 1.98                | 0.20      |
| 84                          | 0.70                | 0.07      | 124       | 2.98                | 0.30      |
| 85                          | 0.56                | 0.06      | 125       | 2.74                | 0.28      |
| 86                          | 0.76                | 0.08      | 126       | 2.19                | 0.22      |
| 87                          | 0.68                | 0.07      | 127       | 3.94                | 0.40      |
| 88                          | 1.57                | 0.16      | 128       | 3.99                | 0.40      |
| 89                          | 0.86                | 0.09      | 129       | 3.93                | 0.40      |
| 90                          | 0.63                | 0.06      | 130       | 3.93                | 0.40      |
| 91                          | 1.44                | 0.15      | 131       | 4.75                | 0.48      |
| 92                          | 1.21                | 0.12      | 132       | 3.65                | 0.37      |
| 93                          | 0.79                | 0.08      | 133       | 1.63                | 0.16      |
| 94                          | 1.22                | 0.12      | 135       | 1.97                | 0.20      |
| 95                          | 2.38                | 0.24      | 136       | 2.52                | 0.25      |
| 96                          | 2.21                | 0.22      | 137       | 1.94                | 0.20      |
| 97                          | 3.77                | 0.38      | 138       | 2.14                | 0.22      |
| 98                          | 3.42                | 0.34      | 139       | 1.37                | 0.14      |
| 99                          | 0.95                | 0.10      | 140       | 2.30                | 0.23      |
| 100                         | 3.19                | 0.32      | 141       | 1.89                | 0.19      |
| 101                         | 1.74                | 0.18      | 142       | 1.39                | 0.14      |
| 102                         | 4.22                | 0.43      | 143       | 1.55                | 0.16      |
| 103                         | 2.28                | 0.23      | 144       | 1.62                | 0.16      |
| 104                         | 1.46                | 0.15      | 145       | 0.94                | 0.09      |
| 105                         | 2.90                | 0.29      | 146       | 0.85                | 0.09      |
| 106                         | 1.13                | 0.11      | 147       | 2.03                | 0.20      |
| 107                         | 1.77                | 0.18      | 148       | 1.26                | 0.13      |
| 108                         | 1.48                | 0.15      | 149       | 0.92                | 0.09      |
| 109                         | 1.13                | 0.11      | 150       | 0.87                | 0.09      |
| 110                         | 0.75                | 0.08      | 152       | 0.83                | 0.08      |
| 111                         | 1.37                | 0.14      | 154       | 1.14                | 0.12      |
| 112                         | 1.36                | 0.14      | 155       | 0.90                | 0.09      |
| 113                         | 1.01                | 0.10      | 156       | 2.23                | 0.22      |
| 114                         | 1.09                | 0.11      | 157       | 0.74                | 0.07      |
| 115                         | 1.41                | 0.14      | 159       | 1.04                | 0.11      |
| 117                         | 6.78                | 0.68      | 160       | 1.34                | 0.14      |
| 118                         | 0.72                | 0.07      | 161       | 1.90                | 0.19      |

**Supplementary Table S1 (continued)**

| Pop2 (ICP 8863 × ICP 11605) |                     |           |
|-----------------------------|---------------------|-----------|
| Sample ID                   | No. reads (Million) | Data (Gb) |
| 162                         | 1.03                | 0.10      |
| 163                         | 1.48                | 0.15      |
| 164                         | 1.25                | 0.13      |
| 165                         | 2.12                | 0.21      |
| 166                         | 2.25                | 0.23      |
| 167                         | 1.28                | 0.13      |
| 168                         | 0.94                | 0.09      |
| 169                         | 1.26                | 0.13      |
| 170                         | 1.68                | 0.17      |
| 171                         | 0.73                | 0.07      |
| 172                         | 0.94                | 0.09      |
| 173                         | 0.92                | 0.09      |
| 174                         | 1.09                | 0.11      |
| 175                         | 1.89                | 0.19      |
| 176                         | 1.16                | 0.12      |
| 177                         | 0.68                | 0.07      |
| 178                         | 1.43                | 0.14      |
| 179                         | 0.58                | 0.06      |
| 180                         | 0.63                | 0.06      |
| 181                         | 0.61                | 0.06      |
| 182                         | 0.63                | 0.06      |
| 183                         | 0.87                | 0.09      |
| 184                         | 0.49                | 0.05      |
| 185                         | 0.98                | 0.10      |
| 186                         | 1.09                | 0.11      |
| 187                         | 0.83                | 0.08      |
| 188                         | 0.78                | 0.08      |
| F <sub>2</sub> total        | 332.68              | 34.67     |
| F <sub>2</sub> average      | 1.90                | 0.20      |

**Supplementary Table S1 (continued)**

| Pop3 (HPL 24 × ICP 11605) |                     |           |           |                     |           |
|---------------------------|---------------------|-----------|-----------|---------------------|-----------|
| Sample ID                 | No. reads (Million) | Data (Gb) | Sample ID | No. reads (Million) | Data (Gb) |
| Parents                   |                     |           | 54        | 1.32                | 0.13      |
| HPL 24                    | 2.96                | 0.30      | 55        | 2.62                | 0.26      |
| ICP 11605                 | 3.31                | 0.33      | 56        | 1.20                | 0.12      |
| F <sub>2</sub>            |                     |           | 57        | 4.88                | 0.49      |
| 2                         | 1.04                | 0.10      | 58        | 1.00                | 0.10      |
| 3                         | 1.29                | 0.13      | 59        | 2.01                | 0.20      |
| 7                         | 4.36                | 0.44      | 60        | 1.64                | 0.17      |
| 8                         | 0.85                | 0.09      | 61        | 1.92                | 0.19      |
| 9                         | 1.96                | 0.20      | 62        | 1.10                | 0.11      |
| 11                        | 1.90                | 0.19      | 63        | 0.80                | 0.08      |
| 13                        | 0.89                | 0.09      | 64        | 0.92                | 0.09      |
| 16                        | 3.65                | 0.37      | 65        | 0.92                | 0.09      |
| 17                        | 1.08                | 0.11      | 66        | 2.66                | 0.27      |
| 18                        | 2.97                | 0.30      | 67        | 1.65                | 0.17      |
| 20                        | 1.08                | 0.11      | 69        | 1.16                | 0.12      |
| 21                        | 1.80                | 0.18      | 71        | 1.45                | 0.15      |
| 22                        | 0.79                | 0.08      | 73        | 2.80                | 0.28      |
| 23                        | 2.29                | 0.23      | 74        | 3.03                | 0.31      |
| 24                        | 0.86                | 0.09      | 75        | 2.57                | 0.26      |
| 25                        | 4.75                | 0.48      | 76        | 1.27                | 0.13      |
| 26                        | 0.81                | 0.08      | 77        | 1.31                | 0.13      |
| 27                        | 1.95                | 0.20      | 78        | 0.97                | 0.10      |
| 31                        | 1.24                | 0.12      | 79        | 3.45                | 0.35      |
| 32                        | 1.03                | 0.10      | 80        | 1.02                | 0.10      |
| 33                        | 3.82                | 0.39      | 83        | 1.13                | 0.11      |
| 34                        | 2.28                | 0.23      | 84        | 1.02                | 0.10      |
| 35                        | 2.07                | 0.21      | 85        | 2.53                | 0.26      |
| 37                        | 0.87                | 0.09      | 86        | 4.84                | 0.49      |
| 39                        | 5.04                | 0.51      | 87        | 2.20                | 0.22      |
| 40                        | 6.84                | 0.69      | 88        | 1.37                | 0.14      |
| 42                        | 1.53                | 0.15      | 89        | 2.58                | 0.26      |
| 43                        | 1.15                | 0.12      | 90        | 3.73                | 0.38      |
| 45                        | 1.10                | 0.11      | 91        | 1.28                | 0.13      |
| 47                        | 3.08                | 0.31      | 92        | 2.57                | 0.26      |
| 49                        | 1.96                | 0.20      | 93        | 3.12                | 0.32      |
| 51                        | 1.36                | 0.14      | 94        | 3.75                | 0.38      |
| 52                        | 1.84                | 0.19      | 95        | 3.45                | 0.35      |
| 53                        | 1.44                | 0.15      | 96        | 2.95                | 0.30      |

**Supplementary Table S1 (continued)**

| Pop3 (HPL 24 × ICP 11605) |                     |           |           |                     |           |
|---------------------------|---------------------|-----------|-----------|---------------------|-----------|
| Sample ID                 | No. reads (Million) | Data (Gb) | Sample ID | No. reads (Million) | Data (Gb) |
| 97                        | 4.42                | 0.45      | 140       | 1.52                | 0.15      |
| 98                        | 4.99                | 0.50      | 141       | 0.80                | 0.08      |
| 99                        | 1.13                | 0.11      | 142       | 1.54                | 0.16      |
| 100                       | 1.80                | 0.18      | 144       | 3.40                | 0.34      |
| 101                       | 2.75                | 0.28      | 145       | 1.73                | 0.18      |
| 102                       | 2.62                | 0.26      | 146       | 1.74                | 0.18      |
| 103                       | 2.42                | 0.24      | 147       | 1.17                | 0.12      |
| 104                       | 2.61                | 0.26      | 148       | 1.23                | 0.12      |
| 105                       | 3.13                | 0.32      | 149       | 3.12                | 0.32      |
| 106                       | 1.79                | 0.18      | 150       | 2.04                | 0.21      |
| 107                       | 3.14                | 0.32      | 151       | 1.80                | 0.18      |
| 108                       | 1.79                | 0.18      | 152       | 1.64                | 0.17      |
| 109                       | 1.26                | 0.13      | 153       | 2.17                | 0.22      |
| 110                       | 2.40                | 0.24      | 154       | 2.52                | 0.25      |
| 111                       | 3.17                | 0.32      | 155       | 2.47                | 0.25      |
| 112                       | 3.18                | 0.32      | 156       | 3.05                | 0.31      |
| 113                       | 1.33                | 0.13      | 157       | 2.47                | 0.25      |
| 114                       | 1.87                | 0.19      | 158       | 1.80                | 0.18      |
| 115                       | 1.26                | 0.13      | 159       | 2.64                | 0.27      |
| 117                       | 1.44                | 0.15      | 160       | 1.86                | 0.19      |
| 119                       | 1.83                | 0.18      | 161       | 2.01                | 0.20      |
| 122                       | 2.25                | 0.23      | 162       | 3.07                | 0.31      |
| 124                       | 1.85                | 0.19      | 163       | 3.07                | 0.31      |
| 125                       | 0.89                | 0.09      | 164       | 2.34                | 0.24      |
| 126                       | 1.64                | 0.17      | 165       | 2.79                | 0.28      |
| 127                       | 2.02                | 0.20      | 166       | 2.56                | 0.26      |
| 128                       | 2.21                | 0.22      | 167       | 4.54                | 0.46      |
| 129                       | 1.08                | 0.11      | 168       | 2.01                | 0.20      |
| 130                       | 1.33                | 0.13      | 169       | 2.65                | 0.27      |
| 131                       | 1.26                | 0.13      | 170       | 2.63                | 0.27      |
| 132                       | 2.06                | 0.21      | 171       | 1.91                | 0.19      |
| 133                       | 1.42                | 0.14      | 172       | 1.96                | 0.20      |
| 134                       | 2.72                | 0.27      | 173       | 2.52                | 0.25      |
| 135                       | 1.80                | 0.18      | 174       | 3.71                | 0.37      |
| 136                       | 2.19                | 0.22      | 175       | 2.68                | 0.27      |
| 137                       | 1.63                | 0.16      | 176       | 3.38                | 0.34      |
| 138                       | 2.54                | 0.26      | 177       | 2.20                | 0.22      |
| 139                       | 1.75                | 0.18      | 178       | 2.45                | 0.25      |



**Supplementary Table S1 (continued)**

| Pop3 (HPL 24 × ICP 11605) |                     |           |
|---------------------------|---------------------|-----------|
| Sample ID                 | No. reads (Million) | Data (Gb) |
| 179                       | 1.01                | 0.10      |
| 180                       | 1.35                | 0.14      |
| 181                       | 2.49                | 0.25      |
| 182                       | 1.70                | 0.17      |
| 183                       | 1.33                | 0.13      |
| 185                       | 0.96                | 0.10      |
| 186                       | 1.29                | 0.13      |
| 187                       | 0.97                | 0.10      |
| 188                       | 3.10                | 0.31      |
| F <sub>2</sub> total      | 335.52              | 33.89     |
| F <sub>2</sub> average    | 2.14                | 0.22      |

| Pop4 (ICP 8863 × ICPL 87119)           |                     |           |           |                     |           |
|----------------------------------------|---------------------|-----------|-----------|---------------------|-----------|
| Sample ID                              | No. reads (Million) | Data (Gb) | Sample ID | No. reads (Million) | Data (Gb) |
| Parents                                |                     |           | 26        | 2.21                | 0.22      |
| ICP 8863                               | 2.56                | 0.26      | 27        | 1.13                | 0.11      |
| ICPL 87119 (Reference genome sequence) |                     |           | 28        | 1.34                | 0.14      |
| F <sub>2</sub>                         |                     |           | 29        | 0.84                | 0.08      |
| 1                                      | 6.45                | 0.65      | 30        | 1.08                | 0.11      |
| 3                                      | 2.71                | 0.27      | 31        | 0.84                | 0.08      |
| 4                                      | 6.48                | 0.65      | 32        | 1.58                | 0.16      |
| 7                                      | 1.17                | 0.12      | 33        | 1.14                | 0.11      |
| 8                                      | 1.66                | 0.17      | 35        | 1.83                | 0.18      |
| 9                                      | 1.75                | 0.18      | 36        | 1.40                | 0.14      |
| 11                                     | 1.07                | 0.11      | 37        | 1.14                | 0.12      |
| 12                                     | 1.31                | 0.13      | 38        | 1.47                | 0.15      |
| 13                                     | 3.33                | 0.34      | 41        | 2.20                | 0.22      |
| 14                                     | 1.10                | 0.11      | 45        | 0.94                | 0.10      |
| 15                                     | 0.89                | 0.09      | 47        | 1.69                | 0.17      |
| 16                                     | 1.20                | 0.12      | 53        | 1.67                | 0.17      |
| 18                                     | 1.00                | 0.10      | 54        | 1.02                | 0.10      |
| 19                                     | 1.73                | 0.18      | 55        | 1.01                | 0.10      |
| 20                                     | 1.94                | 0.20      | 56        | 2.10                | 0.21      |
| 22                                     | 1.52                | 0.15      | 57        | 1.50                | 0.15      |
| 24                                     | 1.76                | 0.18      | 58        | 2.14                | 0.22      |
| 25                                     | 1.38                | 0.14      | 60        | 0.97                | 0.10      |

**Supplementary Table S1 (continued)**

| Pop4 (ICP 8863 × ICPL 87119) |                     |           |           |                     |           |
|------------------------------|---------------------|-----------|-----------|---------------------|-----------|
| Sample ID                    | No. reads (Million) | Data (Gb) | Sample ID | No. reads (Million) | Data (Gb) |
| 61                           | 1.03                | 0.10      | 120       | 1.58                | 0.16      |
| 62                           | 2.04                | 0.21      | 122       | 1.35                | 0.14      |
| 63                           | 1.19                | 0.12      | 123       | 6.32                | 0.64      |
| 64                           | 3.29                | 0.33      | 124       | 1.35                | 0.14      |
| 65                           | 1.14                | 0.12      | 125       | 7.65                | 0.77      |
| 66                           | 1.23                | 0.12      | 126       | 1.53                | 0.15      |
| 68                           | 1.01                | 0.10      | 127       | 0.85                | 0.09      |
| 69                           | 1.42                | 0.14      | 128       | 1.27                | 0.13      |
| 70                           | 0.97                | 0.10      | 130       | 1.35                | 0.14      |
| 71                           | 1.59                | 0.16      | 131       | 1.64                | 0.17      |
| 72                           | 4.24                | 0.43      | 132       | 1.68                | 0.17      |
| 73                           | 2.51                | 0.25      | 136       | 1.04                | 0.11      |
| 74                           | 0.97                | 0.10      | 137       | 1.03                | 0.10      |
| 75                           | 1.31                | 0.13      | 141       | 1.16                | 0.12      |
| 76                           | 1.06                | 0.11      | 142       | 0.89                | 0.09      |
| 77                           | 1.10                | 0.11      | 145       | 0.91                | 0.09      |
| 78                           | 1.54                | 0.16      | 146       | 0.98                | 0.10      |
| 80                           | 1.80                | 0.18      | 147       | 1.22                | 0.12      |
| 81                           | 0.88                | 0.09      | 148       | 1.21                | 0.12      |
| 82                           | 1.10                | 0.11      | 149       | 2.36                | 0.24      |
| 83                           | 0.93                | 0.09      | 150       | 1.71                | 0.17      |
| 84                           | 0.91                | 0.09      | 151       | 1.07                | 0.11      |
| 87                           | 1.73                | 0.17      | 152       | 5.88                | 0.59      |
| 88                           | 2.19                | 0.22      | 153       | 1.33                | 0.13      |
| 92                           | 1.07                | 0.11      | 154       | 4.05                | 0.41      |
| 93                           | 2.36                | 0.24      | 155       | 2.09                | 0.21      |
| 94                           | 1.20                | 0.12      | 157       | 2.74                | 0.28      |
| 101                          | 1.21                | 0.12      | 158       | 2.06                | 0.21      |
| 102                          | 2.58                | 0.26      | 159       | 7.21                | 0.73      |
| 103                          | 2.18                | 0.22      | 162       | 2.14                | 0.22      |
| 105                          | 1.12                | 0.11      | 163       | 0.94                | 0.10      |
| 106                          | 2.60                | 0.26      | 165       | 1.34                | 0.14      |
| 108                          | 1.75                | 0.18      | 166       | 0.92                | 0.09      |
| 109                          | 1.46                | 0.15      | 167       | 1.86                | 0.19      |
| 110                          | 1.66                | 0.17      | 168       | 0.87                | 0.09      |
| 112                          | 0.88                | 0.09      | 171       | 1.59                | 0.16      |
| 117                          | 2.41                | 0.24      | 172       | 1.46                | 0.15      |
| 118                          | 1.57                | 0.16      | 173       | 1.25                | 0.13      |

**Supplementary Table S1 (continued)**

| Pop4 (ICP 8863 × ICPL 87119) |                     |           |
|------------------------------|---------------------|-----------|
| Sample ID                    | No. reads (Million) | Data (Gb) |
| 174                          | 5.19                | 0.52      |
| 175                          | 6.33                | 0.64      |
| 177                          | 3.70                | 0.37      |
| 178                          | 1.33                | 0.13      |
| 179                          | 3.85                | 0.39      |
| 181                          | 3.23                | 0.33      |
| 182                          | 0.96                | 0.10      |
| 184                          | 0.88                | 0.09      |
| 187                          | 1.03                | 0.10      |
| 218                          | 3.19                | 0.32      |
| 220                          | 8.19                | 0.83      |
| 221                          | 1.59                | 0.16      |
| 222                          | 5.33                | 0.54      |
| 223                          | 2.62                | 0.26      |
| 224                          | 4.22                | 0.43      |
| 225                          | 3.42                | 0.35      |
| 226                          | 2.11                | 0.21      |
| 227                          | 3.82                | 0.39      |
| 229                          | 5.47                | 0.55      |
| 231                          | 2.81                | 0.28      |
| 232                          | 4.18                | 0.42      |
| F <sub>2</sub> total         | 284.77              | 28.76     |
| F <sub>2</sub> average       | 2.06                | 0.21      |

**Supplementary Table S1 (continued)**

| Pop5 (ICP 5529 × ICP 11605) |                     |           |           |                     |           |
|-----------------------------|---------------------|-----------|-----------|---------------------|-----------|
| Sample ID                   | No. reads (Million) | Data (Gb) | Sample ID | No. reads (Million) | Data (Gb) |
| Parents                     |                     |           | 37        | 1.29                | 0.13      |
| ICP 5529                    | 5.37                | 0.54      | 38        | 0.64                | 0.06      |
| ICP 11605                   | 1.61                | 0.16      | 39        | 1.09                | 0.11      |
| F <sub>2</sub>              |                     |           | 40        | 1.28                | 0.13      |
| 2                           | 2.25                | 0.23      | 41        | 2.43                | 0.25      |
| 3                           | 0.97                | 0.10      | 42        | 0.89                | 0.09      |
| 4                           | 1.82                | 0.18      | 43        | 2.19                | 0.22      |
| 6                           | 3.40                | 0.34      | 44        | 0.91                | 0.09      |
| 7                           | 1.91                | 0.19      | 45        | 0.86                | 0.09      |
| 8                           | 5.26                | 0.53      | 46        | 0.96                | 0.10      |
| 9                           | 2.57                | 0.26      | 48        | 2.22                | 0.22      |
| 10                          | 1.00                | 0.10      | 49        | 2.66                | 0.27      |
| 12                          | 1.43                | 0.14      | 50        | 2.02                | 0.20      |
| 13                          | 1.14                | 0.12      | 52        | 0.71                | 0.07      |
| 14                          | 1.97                | 0.20      | 53        | 0.96                | 0.10      |
| 15                          | 0.62                | 0.06      | 54        | 0.64                | 0.06      |
| 16                          | 1.00                | 0.10      | 55        | 0.80                | 0.08      |
| 17                          | 1.33                | 0.13      | 56        | 0.99                | 0.10      |
| 18                          | 0.77                | 0.08      | 57        | 3.05                | 0.31      |
| 19                          | 2.59                | 0.26      | 58        | 1.30                | 0.13      |
| 20                          | 0.87                | 0.09      | 59        | 2.02                | 0.20      |
| 21                          | 0.68                | 0.07      | 60        | 2.04                | 0.21      |
| 22                          | 1.02                | 0.10      | 61        | 1.92                | 0.19      |
| 23                          | 4.11                | 0.41      | 62        | 1.73                | 0.17      |
| 24                          | 1.82                | 0.18      | 63        | 1.05                | 0.11      |
| 25                          | 1.98                | 0.20      | 64        | 1.26                | 0.13      |
| 26                          | 1.22                | 0.12      | 65        | 3.57                | 0.36      |
| 27                          | 0.96                | 0.10      | 66        | 2.52                | 0.25      |
| 28                          | 2.82                | 0.28      | 67        | 4.01                | 0.41      |
| 29                          | 0.67                | 0.07      | 68        | 1.46                | 0.15      |
| 30                          | 1.15                | 0.12      | 69        | 2.18                | 0.22      |
| 31                          | 1.26                | 0.13      | 70        | 2.20                | 0.22      |
| 32                          | 0.72                | 0.07      | 71        | 1.19                | 0.12      |
| 33                          | 0.89                | 0.09      | 72        | 1.83                | 0.18      |
| 35                          | 1.94                | 0.20      | 73        | 2.04                | 0.21      |
| 36                          | 1.58                | 0.16      | 74        | 2.26                | 0.23      |

**Supplementary Table S1 (continued)**

| Pop5 (ICP 5529 × ICP 11605) |                     |           |           |                     |           |
|-----------------------------|---------------------|-----------|-----------|---------------------|-----------|
| Sample ID                   | No. reads (Million) | Data (Gb) | Sample ID | No. reads (Million) | Data (Gb) |
| 75                          | 2.70                | 0.27      | 114       | 2.52                | 0.25      |
| 76                          | 1.91                | 0.19      | 115       | 1.17                | 0.12      |
| 77                          | 3.47                | 0.35      | 116       | 0.64                | 0.07      |
| 78                          | 1.89                | 0.19      | 117       | 1.68                | 0.17      |
| 79                          | 2.06                | 0.21      | 118       | 0.51                | 0.05      |
| 80                          | 2.14                | 0.22      | 119       | 0.91                | 0.09      |
| 81                          | 4.08                | 0.41      | 120       | 1.13                | 0.11      |
| 82                          | 1.43                | 0.14      | 121       | 1.56                | 0.16      |
| 83                          | 2.48                | 0.25      | 122       | 1.62                | 0.16      |
| 84                          | 3.11                | 0.31      | 123       | 1.21                | 0.12      |
| 85                          | 0.92                | 0.09      | 124       | 1.91                | 0.19      |
| 86                          | 1.64                | 0.17      | 125       | 0.96                | 0.10      |
| 87                          | 1.89                | 0.19      | 126       | 0.52                | 0.05      |
| 89                          | 1.24                | 0.12      | 127       | 2.93                | 0.30      |
| 90                          | 1.22                | 0.12      | 128       | 1.06                | 0.11      |
| 91                          | 1.37                | 0.14      | 129       | 0.91                | 0.09      |
| 92                          | 1.18                | 0.12      | 130       | 2.32                | 0.23      |
| 93                          | 2.90                | 0.29      | 131       | 1.33                | 0.13      |
| 94                          | 1.92                | 0.19      | 132       | 1.32                | 0.13      |
| 95                          | 1.31                | 0.13      | 133       | 1.00                | 0.10      |
| 96                          | 1.23                | 0.12      | 134       | 0.59                | 0.06      |
| 97                          | 1.91                | 0.19      | 135       | 1.16                | 0.12      |
| 98                          | 1.39                | 0.14      | 136       | 1.43                | 0.14      |
| 99                          | 0.64                | 0.06      | 137       | 2.05                | 0.21      |
| 100                         | 1.06                | 0.11      | 138       | 2.05                | 0.21      |
| 101                         | 0.58                | 0.06      | 139       | 1.53                | 0.15      |
| 102                         | 0.76                | 0.08      | 140       | 1.23                | 0.12      |
| 103                         | 0.74                | 0.07      | 142       | 0.66                | 0.07      |
| 104                         | 0.70                | 0.07      | 143       | 1.29                | 0.13      |
| 105                         | 1.89                | 0.19      | 144       | 0.89                | 0.09      |
| 106                         | 1.04                | 0.11      | 145       | 0.80                | 0.08      |
| 107                         | 0.79                | 0.08      | 146       | 1.65                | 0.17      |
| 108                         | 0.47                | 0.05      | 147       | 1.26                | 0.13      |
| 109                         | 0.41                | 0.04      | 148       | 1.12                | 0.11      |
| 111                         | 0.83                | 0.08      | 149       | 0.74                | 0.07      |
| 112                         | 1.44                | 0.15      | 150       | 1.70                | 0.17      |
| 113                         | 1.61                | 0.16      | 151       | 1.99                | 0.20      |

**Supplementary Table S1 (continued)**

| Pop5 (ICP 5529 × ICP 11605) |                     |           |
|-----------------------------|---------------------|-----------|
| Sample ID                   | No. reads (Million) | Data (Gb) |
| 152                         | 1.56                | 0.16      |
| 153                         | 1.87                | 0.19      |
| 154                         | 2.18                | 0.22      |
| 155                         | 2.81                | 0.28      |
| 156                         | 1.90                | 0.19      |
| 157                         | 2.28                | 0.23      |
| 158                         | 2.73                | 0.28      |
| 159                         | 1.27                | 0.13      |
| 160                         | 2.25                | 0.23      |
| 161                         | 2.04                | 0.21      |
| 162                         | 1.38                | 0.14      |
| 163                         | 3.36                | 0.34      |
| 164                         | 1.86                | 0.19      |
| 165                         | 3.77                | 0.38      |
| 166                         | 2.36                | 0.24      |
| 167                         | 3.08                | 0.31      |
| 168                         | 2.32                | 0.23      |
| 169                         | 1.55                | 0.16      |
| 170                         | 1.98                | 0.20      |
| 171                         | 1.83                | 0.19      |
| 172                         | 2.36                | 0.24      |
| 173                         | 2.96                | 0.30      |
| 174                         | 1.53                | 0.15      |
| 175                         | 3.02                | 0.31      |
| 176                         | 1.95                | 0.20      |
| 177                         | 1.63                | 0.16      |
| 178                         | 2.35                | 0.24      |
| 179                         | 2.11                | 0.21      |
| 180                         | 2.65                | 0.27      |
| 181                         | 2.13                | 0.22      |
| 182                         | 0.69                | 0.07      |
| 183                         | 2.16                | 0.22      |
| 184                         | 0.62                | 0.06      |
| 185                         | 0.92                | 0.09      |
| 186                         | 0.61                | 0.06      |
| 187                         | 1.96                | 0.20      |
| 188                         | 1.94                | 0.20      |
| F <sub>2</sub> total        | 298.56              | 30.15     |
| F <sub>2</sub> average      | 1.67                | 0.17      |

**Supplementary Table S2.** Main effect QTLs for seed protein content and agronomic traits identified using composite interval mapping (CIM) and inclusive composite interval mapping (ICIM) in five pigeonpea F<sub>2</sub> mapping populations

| QTL name                            | Position | Flanking markers            | QTL interval | LOD | PVE (%) | <i>a</i> | <i>d</i> | <i>d/ a </i> | Gene action        |
|-------------------------------------|----------|-----------------------------|--------------|-----|---------|----------|----------|--------------|--------------------|
| <b>Pop1 (ICP 11605 × ICP 14209)</b> |          |                             |              |     |         |          |          |              |                    |
| Seed protein content                |          |                             |              |     |         |          |          |              |                    |
| <i>qPROT-cim-3.1</i>                | 81.4     | S3_12113347 - S3_21274904   | 1.7          | 2.8 | 7.8     | 0.4      | -0.2     | -0.50        | recessive          |
| <i>qPROT-cim-3.2</i>                | 89.7     | S3_23699007 - S3_18226407   | 2.6          | 2.6 | 10.3    | -0.5     | 0.4      | 0.80         | dominant           |
| <i>qPROT-icim-3.1</i>               | 99.0     | S3_25565937 - S3_16199983   | 0.4          | 2.7 | 8.6     | -0.5     | 0.4      | 0.80         | dominant           |
| <i>qPROT-cim-4.1</i>                | 32.5     | S4_1586438 - S4_5314034     | 5.1          | 2.9 | 9.0     | -0.3     | 0.5      | 1.67         | over-dominant      |
| <i>qPROT-cim-11.1</i>               | 43.0     | S11_11249294 - S11_9768899  | 2.5          | 3.5 | 16.6    | -0.6     | 0.5      | 0.83         | dominant           |
| <i>qPROT-cim-11.2</i>               | 170.1    | S11_20646423 - S11_24857528 | 1.4          | 3.8 | 13.8    | -0.5     | 0.3      | 0.60         | partially dominant |
| 100-seed weight                     |          |                             |              |     |         |          |          |              |                    |
| <i>qSW-icim-1.1</i>                 | 15.0     | S1_4374250 - S1_4757283     | 4.8          | 3.0 | 6.6     | -0.3     | 0.4      | 1.57         | over dominant      |
| <i>qSW-icim-4.1</i>                 | 74.0     | S4_4734626 - S4_9854357     | 19.4         | 3.9 | 7.4     | -0.3     | -0.4     | -1.49        | recessive          |
| <i>qSW-cim-6.1</i>                  | 16.7     | S6_14311667 - S6_14311546   | 4.1          | 3.0 | 4.7     | -0.3     | -0.2     | -0.47        | recessive          |
| <i>qSW-cim-8.1</i>                  | 1.0      | S8_5787667 - S8_11399561    | 15.5         | 2.6 | 10.6    | 0.4      | -0.3     | -0.92        | recessive          |
| <i>qSW-cim-8.2</i>                  | 100.3    | S8_13310192 - S8_4675310    | 2.1          | 4.3 | 12.3    | 0.4      | -0.3     | -0.82        | recessive          |
| <i>qSW-icim-8.1</i>                 | 91.0     | S8_7083582 - S8_6388803     | 1.6          | 6.8 | 15.0    | 0.5      | -0.1     | -0.25        | recessive          |
| <i>qSW-icim-10.1</i>                | 60.0     | S10_1984771 - S10_1397376   | 2.5          | 2.9 | 6.4     | 0.1      | 0.6      | 5.27         | over dominant      |
| <i>qSW-cim-11.1</i>                 | 102.3    | S11_23359277 - S11_10698003 | 0.2          | 2.6 | 3.6     | -0.4     | -0.2     | -0.40        | recessive          |
| Seed yield                          |          |                             |              |     |         |          |          |              |                    |
| <i>qSY-cim-3.1</i>                  | 130.0    | S3_14273504 - S3_24137311   | 1.4          | 2.6 | 6.1     | -0.8     | 22.0     | 27.21        | over dominant      |
| <i>qSY-cim-3.2</i>                  | 135.6    | S3_8561649 - S3_8569720     | 5.2          | 3.0 | 5.2     | -12.2    | -3.7     | -0.30        | recessive          |
| <i>qSY-icim-3.1</i>                 | 135.0    | S3_8561649 - S3_8569720     | 5.2          | 4.5 | 10.2    | -14.5    | -4.6     | -0.32        | recessive          |
| <i>qSY-cim-5.1</i>                  | 14.2     | S5_4692888 - S5_4692888     | 0.0          | 2.5 | 5.6     | 1.0      | -16.3    | -16.64       | recessive          |
| <i>qSY-cim-10.1</i>                 | 53.5     | S10_4202839 - S10_1984771   | 8.6          | 3.0 | 15.4    | 12.5     | -16.9    | -1.36        | recessive          |
| <i>qSY-cim-11.1</i>                 | 49.2     | S11_46091155 - S11_33138038 | 1.5          | 2.6 | 7.5     | -6.4     | 18.7     | 2.92         | over dominant      |
| <i>qSY-cim-11.2</i>                 | 152.1    | S11_38654219 - S11_11722207 | 0.7          | 2.8 | 9.6     | -11.2    | 7.3      | 0.65         | partially dominant |
| Growth habit                        |          |                             |              |     |         |          |          |              |                    |

| QTL name                           | Position | Flanking markers            | QTL interval | LOD  | PVE (%) | <i>a</i> | <i>d</i> | <i>d</i> / <i> a </i> | Gene action        |
|------------------------------------|----------|-----------------------------|--------------|------|---------|----------|----------|-----------------------|--------------------|
| <i>qGH-cim-3.1</i>                 | 56.2     | S3_28498782 - S3_21310513   | 2.7          | 3.2  | 10.9    | 0.15     | -0.08    | -0.53                 | recessive          |
| <i>qGH-cim-3.2</i>                 | 65.6     | S3_17441541 - S3_21244595   | 1.6          | 13.9 | 91.3    | 0.32     | -0.30    | -0.95                 | recessive          |
| <i>qGH-icim-3.1</i>                | 66.0     | S3_17441541 - S3_21244595   | 1.6          | 17.3 | 41.3    | 0.32     | -0.29    | -0.91                 | recessive          |
| <i>qGH-cim-3.3</i>                 | 78.5     | S3_14813065 - S3_14778845   | 4.2          | 4.1  | 12.9    | 0.13     | -0.13    | -0.97                 | recessive          |
| <i>qGH-icim-3.2</i>                | 79.0     | S3_14778845 - S3_14778845   | 1.0          | 2.9  | 8.6     | 0.11     | -0.18    | -1.65                 | recessive          |
| <i>qGH-icim-11.1</i>               | 183.0    | S11_24857409 - S11_47336921 | 1.2          | 3.2  | 6.1     | -0.11    | 0.05     | 0.46                  | partially dominant |
| Days to first flowering            |          |                             |              |      |         |          |          |                       |                    |
| <i>qDFF-cim-3.1</i>                | 56.2     | S3_28498782 - S3_21310513   | 2.7          | 5.4  | 14.5    | -6.0     | 0.6      | 0.10                  | additive           |
| <i>qDFF-cim-3.2</i>                | 66.3     | S3_21244595 - S3_28538775   | 2.4          | 9.5  | 20.3    | -8.4     | 0.5      | 0.06                  | additive           |
| <i>qDFF-icim-3.1</i>               | 67.0     | S3_21244595 - S3_28538775   | 2.4          | 11.1 | 25.4    | -9.4     | 2.8      | 0.30                  | partially dominant |
| <i>qDFF-cim-3.3</i>                | 75.5     | S3_14813065 - S3_14778845   | 4.2          | 3.1  | 7.4     | -4.4     | -0.3     | -0.06                 | recessive          |
| <i>qDFF-cim-3.4</i>                | 91.0     | S3_18226407 - S3_5582712    | 0.8          | 2.9  | 5.7     | 4.3      | -0.4     | -0.09                 | recessive          |
| <i>qDFF-cim-11.1</i>               | 124.2    | S11_39257442 - S11_29670540 | 0.9          | 2.5  | 6.5     | -2.3     | 5.7      | 2.44                  | over dominant      |
| <i>qDFF-cim-11.2</i>               | 137.2    | S11_28741859 - S11_20235498 | 0.9          | 2.9  | 7.2     | 4.0      | -1.7     | -0.43                 | recessive          |
| <b>Pop2 (ICP 8863 x ICP 11605)</b> |          |                             |              |      |         |          |          |                       |                    |
| Seed protein content               |          |                             |              |      |         |          |          |                       |                    |
| <i>qPROT-cim-1.1</i>               | 20.2     | S1_15372966 - S1_5944791    | 1.1          | 2.6  | 7.7     | 0.4      | -0.3     | -0.75                 | recessive          |
| <i>qPROT-icim-3.1</i>              | 2.0      | S3_22234078 - S3_19578263   | 2.2          | 2.7  | 6.9     | 0.3      | -0.5     | -1.67                 | recessive          |
| <i>qPROT-cim-3.1</i>               | 55.9     | S3_17193829 - S3_14758073   | 11.8         | 3.8  | 12.8    | 0.7      | -0.3     | -0.43                 | recessive          |
| <i>qPROT-icim-3.2</i>              | 56.0     | S3_17193829 - S3_14758073   | 11.8         | 2.9  | 7.4     | 0.6      | -0.3     | -0.50                 | recessive          |
| <i>qPROT-cim-9.1</i>               | 67.4     | S9_10003418 - S9_10229309   | 1.4          | 3.6  | 5.7     | 0.1      | -0.8     | -8.00                 | recessive          |
| <i>qPROT-icim-11.1</i>             | 46.0     | S11_2019429 - S11_22353396  | 2.0          | 2.7  | 12.3    | -0.7     | 0.5      | 0.71                  | partially dominant |
| <i>qPROT-icim-11.2</i>             | 126.0    | S11_21940736 - S11_30337876 | 1.0          | 2.9  | 9.4     | 0.6      | 0.4      | 0.67                  | partially dominant |
| <i>qPROT-cim-11.1</i>              | 126.1    | S11_30337876 - S11_45761666 | 1.6          | 3.4  | 0.7     | 0.4      | 0.5      | 1.25                  | over-dominant      |
| 100-seed weight                    |          |                             |              |      |         |          |          |                       |                    |
| <i>qSW-cim-1.1</i>                 | 7.4      | S1_4759267 - S1_15329865    | 4.6          | 4.6  | 6.1     | 0.6      | 0.2      | 0.36                  | partially dominant |
| <i>qSW-cim-1.2</i>                 | 22.2     | S1_5944791 - S1_9033631     | 9.9          | 3.4  | 7.5     | 0.7      | 0.2      | 0.26                  | partially dominant |
| <i>qSW-icim-1.1</i>                | 22.0     | S1_5944791 - S1_9033631     | 9.9          | 9.9  | 29.1    | 1.0      | 0.2      | 0.20                  | additive           |



| QTL name                | Position | Flanking markers            | QTL interval | LOD  | PVE (%) | <i>a</i> | <i>d</i> | <i>d</i> / <i> a</i> | Gene action        |
|-------------------------|----------|-----------------------------|--------------|------|---------|----------|----------|----------------------|--------------------|
| qSW-icim-11.1           | 165.0    | S11_41096347 - S11_44938548 | 1.3          | 2.7  | 8.4     | 0.5      | -0.5     | -0.91                | recessive          |
| Seed yield              |          |                             |              |      |         |          |          |                      |                    |
| qSY-cim-1.1             | 9.4      | S1_4759267 - S1_15329865    | 4.6          | 2.9  | 7.1     | -14.0    | -5.0     | -0.36                | recessive          |
| qSY-icim-1.1            | 36.0     | S1_12899653 - S1_11050274   | 3.2          | 4.8  | 9.8     | -11.3    | -7.0     | -0.62                | recessive          |
| qSY-icim-2.1            | 171.0    | S2_13394818 - S2_26969919   | 2.3          | 3.5  | 7.3     | 2.2      | 14.8     | 6.77                 | over dominant      |
| qSY-icim-3.1            | 2.0      | S3_22234078 - S3_19578263   | 2.2          | 8.0  | 16.0    | -1.6     | 21.1     | 13.50                | over dominant      |
| qSY-cim-3.1             | 3.2      | S3_19578263 - S3_21274904   | 3.8          | 5.3  | 11.8    | -2.0     | 21.0     | 10.56                | over dominant      |
| qSY-icim-6.1            | 69.0     | S6_18322776 - S6_18322873   | 3.1          | 5.7  | 9.4     | -10.4    | 2.1      | 0.20                 | additive           |
| qSY-icim-7.1            | 71.0     | S7_6897487 - S7_14683829    | 11.5         | 3.6  | 5.9     | 9.2      | 3.3      | 0.36                 | partially dominant |
| qSY-cim-11.1            | 28.8     | S11_9114357 - S11_4453854   | 5.2          | 3.0  | 10.6    | 9.8      | -22.6    | -2.30                | recessive          |
| qSY-icim-11.1           | 31.0     | S11_9114357 - S11_4453854   | 5.2          | 4.6  | 11.3    | 4.6      | -18.5    | -4.00                | recessive          |
| qSY-cim-11.2            | 125.1    | S11_21940736 - S11_30337876 | 1.0          | 4.1  | 1.7     | -9.2     | -10.2    | -1.11                | recessive          |
| Growth habit            |          |                             |              |      |         |          |          |                      |                    |
| qGH-cim-2.1             | 139.1    | S2_32727778 - S2_13394806   | 0.6          | 2.7  | 4.0     | -0.1     | 0.0      | -0.05                | recessive          |
| qGH-cim-3.1             | 2.0      | S3_22234078 - S3_19578263   | 2.2          | 4.9  | 13.1    | 0.1      | -0.2     | -1.23                | recessive          |
| qGH-cim-3.2             | 9.0      | S3_21274904 - S3_28538775   | 6.6          | 8.2  | 37.0    | 0.2      | -0.4     | -1.66                | recessive          |
| qGH-icim-3.1            | 20.0     | S3_28933239 - S3_21244595   | 6.8          | 12.4 | 23.9    | 0.2      | -0.3     | -1.31                | recessive          |
| qGH-cim-3.3             | 22.7     | S3_21244595 - S3_18933167   | 7.6          | 14.0 | 36.6    | 0.2      | -0.3     | -1.28                | recessive          |
| qGH-icim-3.2            | 43.0     | S3_18929445 - S3_18929378   | 5.1          | 15.0 | 25.4    | 0.2      | -0.2     | -0.96                | recessive          |
| qGH-cim-3.4             | 51.4     | S3_18929378 - S3_17193829   | 8.5          | 9.8  | 64.7    | 0.2      | -0.4     | -1.65                | recessive          |
| Days to first flowering |          |                             |              |      |         |          |          |                      |                    |
| qDFF-icim-2.1           | 174.0    | S2_6037470 - S2_6037490     | 0.6          | 2.6  | 4.5     | 4.3      | -4.0     | -0.91                | recessive          |
| qDFF-cim-3.1            | 1.0      | S3_22234078 - S3_19578263   | 2.2          | 4.0  | 16.0    | -3.9     | 5.6      | 1.44                 | over dominant      |
| qDFF-cim-3.2            | 25.7     | S3_21244595 - S3_18933167   | 7.6          | 6.2  | 19.1    | -5.5     | 2.4      | 0.44                 | partially dominant |
| qDFF-cim-3.3            | 41.3     | S3_18929445 - S3_18929378   | 5.1          | 9.9  | 28.2    | -6.5     | 3.6      | 0.56                 | partially dominant |
| qDFF-icim-3.1           | 42.0     | S3_18929445 - S3_18929378   | 5.1          | 11.7 | 26.6    | -7.8     | 1.5      | 0.19                 | additive           |
| qDFF-cim-11.1           | 56.3     | S11_42065843 - S11_26230931 | 2.3          | 2.9  | 4.0     | -4.4     | -3.2     | -0.74                | recessive          |
| qDFF-cim-11.2           | 128.3    | S11_45761666 - S11_18137395 | 0.6          | 3.0  | 8.1     | 2.9      | -3.6     | -1.23                | recessive          |

| QTL name                         | Position | Flanking markers            | QTL interval | LOD  | PVE (%) | <i>a</i> | <i>d</i> | <i>d/ a </i> | Gene action        |
|----------------------------------|----------|-----------------------------|--------------|------|---------|----------|----------|--------------|--------------------|
| qDFF-cim-11.3                    | 136.2    | S11_26422066 - S11_32080647 | 2.2          | 3.4  | 36.3    | 5.9      | -6.2     | -1.06        | recessive          |
| qDFF-icim-11.1                   | 137.0    | S11_26422066 - S11_32080647 | 2.2          | 3.1  | 7.9     | 2.9      | -5.7     | -1.98        | recessive          |
| <b>Pop3 (HPL 24 x ICP 11605)</b> |          |                             |              |      |         |          |          |              |                    |
| Seed protein content             |          |                             |              |      |         |          |          |              |                    |
| <i>qPROT-icim-2.1</i>            | 20.0     | S2_17395609 - S2_17836619   | 5.7          | 3.7  | 7.9     | 0.6      | -0.1     | -0.17        | recessive          |
| <i>qPROT-cim-2.1</i>             | 28.6     | S2_18621223 - S2_5077845    | 4.1          | 4.1  | 23.5    | 0.9      | -0.6     | -0.67        | recessive          |
| <i>qPROT-icim-2.2</i>            | 67.0     | S2_17642300 - S2_27324059   | 1.6          | 3.4  | 10.0    | 0.8      | 0.0      | 0.00         | additive           |
| <i>qPROT-cim-2.2</i>             | 67.5     | S2_27324059 - S2_27324056   | 0.1          | 3.1  | 6.0     | 0.6      | 0.0      | 0.00         | additive           |
| <i>qPROT-icim-3.1</i>            | 10.0     | S3_28538775 - S3_21274904   | 10.0         | 3.0  | 5.8     | -0.6     | -0.1     | -0.17        | recessive          |
| <i>qPROT-cim-3.1</i>             | 40.8     | S3_17145449 - S3_18154873   | 3.4          | 4.4  | 4.1     | -0.6     | -0.5     | -0.83        | recessive          |
| <i>qPROT-cim-3.2</i>             | 46.7     | S3_18154848 - S3_17193829   | 3.4          | 4.6  | 3.8     | -0.6     | -0.6     | -1.00        | recessive          |
| <i>qPROT-cim-3.3</i>             | 55.1     | S3_18154875 - S3_14813065   | 4.7          | 3.2  | 5.6     | -0.7     | -0.2     | -0.29        | recessive          |
| <i>qPROT-icim-3.2</i>            | 102.0    | S3_6531705 - S3_24127268    | 1.8          | 2.5  | 6.7     | -0.4     | -0.6     | -1.50        | recessive          |
| <i>qPROT-icim-6.1</i>            | 75.0     | S6_14548839 - S6_6094182    | 7.0          | 3.8  | 9.2     | 0.6      | -0.5     | -0.83        | recessive          |
| <i>qPROT-icim-10.1</i>           | 21.0     | S10_6745618 - S10_18754549  | 20.7         | 2.8  | 5.1     | -0.2     | -0.7     | -3.50        | recessive          |
| <i>qPROT-cim-11.1</i>            | 82.6     | S11_17781645 - S11_39391791 | 0.3          | 3.0  | 7.4     | 0.4      | -0.6     | -1.50        | recessive          |
| <i>qPROT-icim-11.1</i>           | 119.0    | S11_45315652 - S11_32081128 | 0.7          | 2.7  | 9.5     | 0.7      | 0.7      | 1.00         | dominant           |
| <i>qPROT-icim-11.2</i>           | 123.0    | S11_7540489 - S11_21960241  | 0.4          | 4.2  | 8.5     | 0.8      | 1.0      | 1.25         | over-dominant      |
| 100-seed weight                  |          |                             |              |      |         |          |          |              |                    |
| qSW-cim-1.1                      | 43.9     | S1_11314974 - S1_4759267    | 1.4          | 9.8  | 44.4    | -0.9     | 0.6      | 0.59         | partially dominant |
| qSW-cim-1.2                      | 53.8     | S1_9401795 - S1_5944791     | 1.6          | 13.6 | 46.6    | -1.0     | 0.6      | 0.55         | partially dominant |
| qSW-icim-1.1                     | 54.0     | S1_5944791 - S1_5441596     | 0.8          | 13.7 | 35.7    | -1.2     | 0.4      | 0.36         | partially dominant |
| qSW-cim-1.3                      | 66.9     | S1_15394802 - S1_6218143    | 4.2          | 4.8  | 10.3    | -0.6     | -0.1     | -0.16        | recessive          |
| qSW-cim-5.1                      | 3.0      | S5_3437907 - S5_3437906     | 3.2          | 2.5  | 5.4     | -0.4     | 0.1      | 0.27         | partially dominant |
| qSW-icim-8.1                     | 6.0      | S8_388862 - S8_648217       | 3.1          | 7.7  | 16.3    | -0.7     | 0.1      | 0.18         | additive           |
| qSW-cim-8.1                      | 7.0      | S8_388862 - S8_648217       | 3.1          | 7.4  | 16.0    | -0.7     | 0.1      | 0.11         | additive           |
| Seed yield                       |          |                             |              |      |         |          |          |              |                    |
| qSY-icim-1.1                     | 92.0     | S1_12652912 - S1_556023     | 2.2          | 2.8  | 9.1     | -7.8     | -11.4    | -1.46        | recessive          |

| QTL name                | Position | Flanking markers            | QTL interval | LOD  | PVE (%) | <i>a</i> | <i>d</i> | <i>d</i> / <i> a</i> | Gene action   |
|-------------------------|----------|-----------------------------|--------------|------|---------|----------|----------|----------------------|---------------|
| qSY-icim-2.1            | 106.0    | S2_33896199 - S2_36167974   | 1.1          | 2.5  | 4.5     | 4.1      | -9.2     | -2.27                | recessive     |
| qSY-cim-2.1             | 106.0    | S2_33896199 - S2_36167974   | 1.1          | 3.6  | 16.0    | 9.2      | -9.7     | -1.06                | recessive     |
| qSY-cim-2.2             | 152.4    | S2_19392910 - S2_6254553    | 6.1          | 3.3  | 14.4    | 6.4      | -13.5    | -2.10                | recessive     |
| qSY-cim-2.3             | 210.8    | S2_22210488 - S2_3910532    | 5.1          | 2.7  | 8.9     | -0.8     | -14.7    | -17.30               | recessive     |
| qSY-icim-3.1            | 48.0     | S3_18154848 - S3_17193829   | 3.4          | 3.6  | 7.1     | 1.0      | 11.3     | 11.64                | over dominant |
| qSY-icim-3.2            | 117.0    | S3_8766429 - S3_18226407    | 1.0          | 2.7  | 7.7     | 5.7      | -10.6    | -1.87                | recessive     |
| qSY-icim-4.1            | 14.0     | S4_3592410 - S4_2761907     | 16.1         | 6.5  | 20.3    | -1.8     | 20.4     | 11.27                | over dominant |
| qSY-cim-4.1             | 16.1     | S4_3592410 - S4_2761907     | 16.1         | 5.4  | 5.9     | -2.3     | 16.7     | 7.18                 | over dominant |
| qSY-cim-10.1            | 63.8     | S10_22177883 - S10_12463946 | 4.0          | 3.4  | 40.2    | 5.2      | -22.6    | -4.38                | recessive     |
| qSY-cim-11.1            | 68.4     | S11_36998432 - S11_36724203 | 1.2          | 2.6  | 8.6     | 8.2      | -4.0     | -0.49                | recessive     |
| qSY-icim-11.1           | 82.0     | S11_10013709 - S11_6081367  | 0.5          | 3.1  | 9.2     | 10.2     | -10.7    | -1.05                | recessive     |
| qSY-cim-11.2            | 82.5     | S11_6081367 - S11_45330880  | 0.1          | 3.0  | 11.3    | 6.6      | -7.2     | -1.09                | recessive     |
| qSY-cim-11.3            | 128.0    | S11_45580349 - S11_24800852 | 0.6          | 2.5  | 4.8     | -0.2     | -11.3    | -53.08               | recessive     |
| Growth habit            |          |                             |              |      |         |          |          |                      |               |
| qGH-cim-3.1             | 14.7     | S3_21274904 - S3_21244595   | 4.7          | 25.3 | 6.4     | -0.4     | -0.4     | -0.96                | recessive     |
| qGH-icim-3.1            | 16.0     | S3_21244595 - S3_22913898   | 6.9          | 31.4 | 54.4    | -0.4     | -0.4     | -1.21                | recessive     |
| qGH-cim-3.2             | 22.1     | S3_19132565 - S3_25402258   | 0.4          | 20.3 | 6.5     | -0.4     | -0.4     | -1.10                | recessive     |
| qGH-icim-3.2            | 37.0     | S3_17628375 - S3_17145449   | 6.3          | 10.8 | 14.3    | -0.2     | -0.1     | -0.64                | recessive     |
| qGH-cim-3.3             | 46.7     | S3_18154848 - S3_17193829   | 3.4          | 13.1 | 13.3    | -0.3     | -0.4     | -1.62                | recessive     |
| qGH-cim-3.4             | 55.1     | S3_18154875 - S3_14813065   | 4.7          | 7.8  | 5.8     | -0.1     | -0.4     | -3.03                | recessive     |
| qGH-icim-4.1            | 0.0      | S4_3592410 - S4_2761907     | 16.1         | 3.6  | 4.1     | 0.0      | 0.2      | 5.34                 | over dominant |
| qGH-icim-8.1            | 119.0    | S8_15841326 - S8_14899494   | 3.1          | 3.0  | 4.0     | 0.0      | -0.2     | -6.71                | recessive     |
| qGH-cim-9.1             | 21.2     | S9_10003418 - S9_8998000    | 4.7          | 3.0  | 5.2     | 0.1      | -0.2     | -3.22                | recessive     |
| Days to first flowering |          |                             |              |      |         |          |          |                      |               |
| qDFF-icim-2.1           | 90.0     | S2_23123517 - S2_34204720   | 1.1          | 2.9  | 3.4     | -3.8     | -0.7     | -0.19                | recessive     |
| qDFF-icim-2.2           | 188.0    | S2_3012518 - S2_36010450    | 8.8          | 2.7  | 4.1     | 1.8      | -5.9     | -3.34                | recessive     |
| qDFF-icim-3.1           | 17.0     | S3_21244595 - S3_22913898   | 6.9          | 9.1  | 14.7    | 9.2      | 1.7      | 0.18                 | additive      |
| qDFF-cim-3.1            | 24.4     | S3_25402258 - S3_18933167   | 3.0          | 16.0 | 13.2    | 13.9     | 12.2     | 0.88                 | dominant      |

| QTL name                            | Position | Flanking markers            | QTL interval | LOD  | PVE (%) | <i>a</i> | <i>d</i> | <i>d</i> / <i> a </i> | Gene action        |
|-------------------------------------|----------|-----------------------------|--------------|------|---------|----------|----------|-----------------------|--------------------|
| qDFF-icim-3.2                       | 36.0     | S3_17628375 - S3_17145449   | 6.3          | 20.0 | 31.9    | 8.9      | 11.0     | 1.24                  | over dominant      |
| qDFF-cim-3.2                        | 46.7     | S3_18154848 - S3_17193829   | 3.4          | 6.9  | 40.3    | 3.8      | 11.1     | 2.92                  | over dominant      |
| qDFF-cim-3.3                        | 54.1     | S3_18154875 - S3_14813065   | 4.7          | 4.4  | 39.7    | -1.8     | 11.3     | 6.28                  | over dominant      |
| qDFF-icim-3.3                       | 123.0    | S3_8040710 - S3_23698867    | 2.5          | 6.7  | 8.4     | 6.7      | -2.2     | -0.32                 | recessive          |
| qDFF-icim-11.1                      | 22.0     | S11_27958079 - S11_24152343 | 0.2          | 2.6  | 4.8     | 0.6      | 6.7      | 11.71                 | over dominant      |
|                                     |          |                             |              |      |         |          |          |                       |                    |
| <b>Pop4 (ICP 8863 x ICPL 87119)</b> |          |                             |              |      |         |          |          |                       |                    |
| Seed protein content                |          |                             |              |      |         |          |          |                       |                    |
| <i>qPROT-cim-2.1</i>                | 41.6     | S2_16460899 - S2_2144739    | 1.3          | 3.0  | 1.7     | 0.3      | 0.5      | 1.67                  | overdominant       |
| <i>qPROT-icim-2.1</i>               | 42.0     | S2_16460899 - S2_2144739    | 1.3          | 2.7  | 8.5     | 0.4      | 0.5      | 1.25                  | overdominant       |
| <i>qPROT-icim-2.2</i>               | 178.0    | S2_9426717 - S2_24073225    | 2.2          | 7.5  | 18.9    | 0.2      | 1.3      | 6.50                  | overdominant       |
| <i>qPROT-icim-6.1</i>               | 83.0     | S6_20608121 - S6_12302413   | 5.3          | 4.3  | 10.6    | 0.1      | -0.8     | -8.00                 | recessive          |
| <i>qPROT-cim-6.1</i>                | 83.8     | S6_12302413 - S6_1292942    | 4.4          | 4.2  | 16.3    | 0.5      | -0.6     | -1.20                 | recessive          |
| <i>qPROT-cim-6.2</i>                | 154.4    | S6_11344426 - S6_1641606    | 7.3          | 3.3  | 8.3     | -0.1     | 0.8      | 8.00                  | overdominant       |
| <i>qPROT-cim-7.1</i>                | 122.7    | S7_462935 - S7_1601723      | 1.6          | 3.3  | 11.3    | -0.2     | 0.9      | 4.50                  | overdominant       |
| <i>qPROT-cim-8.1</i>                | 61.6     | S8_1988786 - S8_19001660    | 1.9          | 2.5  | 6.7     | 0.2      | -0.7     | -3.50                 | recessive          |
| <i>qPROT-icim-8.1</i>               | 70.0     | S8_9578163 - S8_4817489     | 0.9          | 3.8  | 8.2     | -0.1     | 0.7      | 7.00                  | overdominant       |
| <i>qPROT-cim-10.1</i>               | 95.8     | S10_17537652 - S10_632595   | 3.2          | 2.6  | 1.7     | 0.4      | 1.1      | 2.75                  | overdominant       |
| <i>qPROT-cim-11.1</i>               | 2.0      | S11_38211354 - S11_36725317 | 5.4          | 3.0  | 8.1     | -0.2     | 0.9      | 4.50                  | overdominant       |
| <i>qPROT-cim-11.2</i>               | 84.4     | S11_20139207 - S11_25774244 | 0.2          | 4.1  | 9.1     | -0.1     | 0.9      | 9.00                  | overdominant       |
| <i>qPROT-cim-11.3</i>               | 100.4    | S11_24067221 - S11_26654392 | 0.2          | 2.6  | 1.8     | 0.2      | 0.7      | 3.50                  | overdominant       |
| <i>qPROT-cim-11.4</i>               | 137.2    | S11_18198760 - S11_11799702 | 1.0          | 2.7  | 2.0     | 0.5      | 0.3      | 0.60                  | partially dominant |
| 100-seed weight                     |          |                             |              |      |         |          |          |                       |                    |
| qSW-cim-2.1                         | 37.7     | S2_28067626 - S2_2334639    | 1.8          | 3.5  | 26.7    | 0.5      | -0.5     | -1.05                 | recessive          |
| qSW-cim-2.2                         | 90.7     | S2_11771536 - S2_10960200   | 0.1          | 2.7  | 10.1    | 0.2      | -0.5     | -2.15                 | recessive          |
| qSW-cim-2.3                         | 118.2    | S2_6037523 - S2_5078598     | 2.4          | 2.8  | 14.3    | 0.3      | -0.6     | -1.90                 | recessive          |
| qSW-icim-3.1                        | 60.0     | S3_7169453 - S3_6422339     | 2.8          | 3.7  | 9.4     | -0.4     | 0.2      | 0.41                  | partially dominant |
| qSW-cim-3.1                         | 60.8     | S3_6422339 - S3_16299670    | 0.1          | 4.8  | 16.9    | -0.6     | 0.1      | 0.21                  | partially dominant |

| QTL name                | Position | Flanking markers            | QTL interval | LOD | PVE (%) | <i>a</i> | <i>d</i> | <i>d</i> / <i> a</i> | Gene action        |
|-------------------------|----------|-----------------------------|--------------|-----|---------|----------|----------|----------------------|--------------------|
| qSW-icim-8.1            | 14.0     | S8_18946297 - S8_11986619   | 2.0          | 4.4 | 13.1    | -0.2     | 0.7      | 3.99                 | over dominant      |
| qSW-icim-10.1           | 153.0    | S10_15140940 - S10_632618   | 5.8          | 2.5 | 4.9     | 0.5      | -0.5     | -1.05                | recessive          |
| qSW-cim-11.1            | 12.3     | S11_27825757 - S11_9769716  | 1.7          | 4.3 | 13.0    | 0.2      | -0.6     | -2.37                | recessive          |
| qSW-icim-11.1           | 104.0    | S11_14467653 - S11_11799692 | 1.2          | 3.1 | 12.3    | 0.0      | -0.7     | -67.75               | recessive          |
| qSW-cim-11.2            | 121.7    | S11_10013768 - S11_47645855 | 0.1          | 2.6 | 8.7     | 0.5      | 0.0      | 0.05                 | additive           |
| Seed yield              |          |                             |              |     |         |          |          |                      |                    |
| qSY-icim-1.1            | 9.0      | S1_1145802 - S1_14036679    | 0.8          | 3.7 | 10.3    | 3.9      | -18.8    | -4.76                | recessive          |
| qSY-icim-2.1            | 93.0     | S2_24889905 - S2_3670647    | 1.2          | 3.0 | 7.8     | -26.7    | -29.0    | -1.09                | recessive          |
| qSY-cim-4.1             | 31.3     | S4_11052197 - S4_10704406   | 0.7          | 3.3 | 11.3    | -14.6    | 2.3      | 0.16                 | additive           |
| qSY-cim-5.1             | 20.6     | S5_2134830 - S5_2134832     | 6.1          | 3.9 | 39.0    | 55.1     | -41.4    | -0.75                | partially dominant |
| qSY-icim-7.1            | 17.0     | S7_8660317 - S7_1644160     | 13.8         | 3.3 | 10.7    | -11.4    | -13.7    | -1.20                | recessive          |
| qSY-icim-7.2            | 111.0    | S7_908957 - S7_17105607     | 3.0          | 3.7 | 6.4     | -16.9    | -16.8    | -0.99                | recessive          |
| qSY-icim-8.1            | 46.0     | S8_13861942 - S8_19001717   | 4.8          | 2.6 | 5.8     | -12.3    | -7.7     | -0.63                | recessive          |
| qSY-cim-10.1            | 155.5    | S10_15140940 - S10_632618   | 5.8          | 3.0 | 53.0    | 19.1     | -41.0    | -2.15                | recessive          |
| qSY-cim-11.1            | 84.6     | S11_39685164 - S11_2994853  | 0.7          | 3.9 | 6.7     | -2.4     | -22.9    | -9.49                | recessive          |
| qSY-icim-11.1           | 85.0     | S11_39685164 - S11_2994853  | 0.7          | 3.1 | 10.7    | 0.3      | -23.0    | -69.84               | recessive          |
| qSY-cim-11.2            | 197.6    | S11_10379800 - S11_39387203 | 14.8         | 4.0 | 10.3    | 51.3     | -51.6    | -1.00                | recessive          |
| Days to first flowering |          |                             |              |     |         |          |          |                      |                    |
| qDFF-icim-1.1           | 14.0     | S1_14036679 - S1_11242012   | 4.6          | 6.8 | 15.2    | -5.3     | 1.7      | 0.32                 | partially dominant |
| qDFF-cim-1.1            | 14.3     | S1_11242012 - S1_15951980   | 0.1          | 3.7 | 14.0    | -3.8     | 3.1      | 0.82                 | dominant           |
| qDFF-cim-1.2            | 29.1     | S1_16743053 - S1_11236611   | 0.3          | 2.8 | 11.1    | -2.4     | 4.3      | 1.77                 | over dominant      |
| qDFF-cim-1.3            | 75.1     | S1_1158266 - S1_12641760    | 9.1          | 2.8 | 2.3     | 1.4      | 5.9      | 4.29                 | over dominant      |
| qDFF-cim-2.1            | 41.0     | S2_2989918 - S2_16460899    | 0.6          | 4.4 | 4.2     | -0.1     | 6.3      | 76.31                | over dominant      |
| qDFF-cim-2.2            | 90.7     | S2_11771536 - S2_10960200   | 0.1          | 3.0 | 11.2    | -1.7     | 5.2      | 3.04                 | over dominant      |
| qDFF-cim-2.3            | 133.3    | S2_2989899 - S2_1760098     | 0.1          | 4.2 | 4.5     | 0.6      | 6.5      | 11.68                | over dominant      |
| qDFF-cim-3.1            | 2.9      | S3_6422190 - S3_10282824    | 6.7          | 2.8 | 7.8     | -0.9     | 4.3      | 4.97                 | over dominant      |
| qDFF-cim-3.2            | 143.4    | S3_4923672 - S3_4949379     | 1.9          | 2.9 | 2.1     | 3.1      | 4.5      | 1.44                 | over dominant      |
| qDFF-icim-6.1           | 72.0     | S6_18172388 - S6_12492736   | 1.4          | 5.1 | 14.9    | 1.3      | 7.0      | 5.36                 | over dominant      |

| QTL name                           | Position | Flanking markers            | QTL interval | LOD | PVE (%) | <i>a</i> | <i>d</i> | <i>d/ a </i> | Gene action        |
|------------------------------------|----------|-----------------------------|--------------|-----|---------|----------|----------|--------------|--------------------|
| qDFF-cim-6.1                       | 72.5     | S6_18172388 - S6_12492736   | 1.4          | 3.2 | 2.5     | 1.1      | 6.6      | 6.25         | over dominant      |
| qDFF-icim-6.2                      | 95.0     | S6_21912913 - S6_11368997   | 2.0          | 3.0 | 10.9    | -3.0     | 5.1      | 1.72         | over dominant      |
| qDFF-cim-6.2                       | 100.8    | S6_11368993 - S6_16630543   | 1.0          | 3.2 | 14.2    | 3.9      | -2.6     | -0.67        | recessive          |
| qDFF-icim-6.3                      | 108.0    | S6_18172301 - S6_6790172    | 1.4          | 3.7 | 8.3     | 3.3      | 5.6      | 1.67         | over dominant      |
| qDFF-icim-6.4                      | 112.0    | S6_6790172 - S6_9119183     | 4.3          | 2.9 | 9.8     | 3.0      | 3.5      | 1.16         | over dominant      |
| qDFF-icim-8.1                      | 53.0     | S8_1870690 - S8_14893200    | 11.0         | 3.5 | 12.0    | -3.8     | 4.2      | 1.10         | over dominant      |
| qDFF-cim-8.1                       | 54.7     | S8_1870690 - S8_14893200    | 11.0         | 3.9 | 32.4    | -3.4     | 7.8      | 2.27         | over dominant      |
| qDFF-cim-8.2                       | 76.8     | S8_2216092 - S8_19416095    | 2.1          | 4.5 | 2.1     | 2.0      | 6.4      | 3.18         | over dominant      |
| qDFF-cim-10.1                      | 2.9      | S10_8436572 - S10_8682299   | 1.6          | 2.6 | 10.9    | -1.0     | 6.9      | 6.64         | over dominant      |
| qDFF-cim-10.2                      | 85.8     | S10_15140871 - S10_12011468 | 0.8          | 2.7 | 5.9     | -0.5     | 4.9      | 9.97         | over dominant      |
| qDFF-icim-11.1                     | 30.0     | S11_6866243 - S11_22800082  | 0.5          | 3.0 | 11.2    | -1.9     | 5.1      | 2.69         | over dominant      |
| qDFF-cim-11.1                      | 30.3     | S11_22800082 - S11_27825774 | 0.0          | 3.2 | 11.1    | -1.6     | 7.8      | 4.86         | over dominant      |
| qDFF-cim-11.2                      | 60.3     | S11_25088688 - S11_12824405 | 0.0          | 3.1 | 43.8    | -4.4     | 7.9      | 1.82         | over dominant      |
| qDFF-cim-11.3                      | 112.5    | S11_38856677 - S11_1583891  | 0.4          | 3.4 | 28.5    | -3.4     | 8.2      | 2.42         | over dominant      |
| qDFF-cim-11.4                      | 137.4    | S11_22689703 - S11_19044341 | 0.9          | 3.3 | 5.0     | 0.2      | 5.4      | 25.63        | over dominant      |
| qDFF-cim-11.5                      | 143.2    | S11_24070770 - S11_13882393 | 1.4          | 3.2 | 6.9     | 0.1      | 7.4      | 107.58       | over dominant      |
| <b>Pop5 (ICP 5529 x ICP 11605)</b> |          |                             |              |     |         |          |          |              |                    |
| Seed protein content               |          |                             |              |     |         |          |          |              |                    |
| <i>qPROT-cim-1.1</i>               | 46.6     | S1_1798648 - S1_1798766     | 2.6          | 2.6 | 4.4     | 0.3      | 0.1      | 0.33         | partially dominant |
| <i>qPROT-cim-2.1</i>               | 27.8     | S2_6930418 - S2_16133939    | 0.3          | 3.0 | 9.3     | -0.5     | 0.2      | 0.40         | partially dominant |
| <i>qPROT-icim-2.1</i>              | 34.0     | S2_10279728 - S2_32698493   | 0.2          | 6.6 | 16.5    | -0.4     | 0.4      | 1.00         | dominant           |
| <i>qPROT-cim-2.2</i>               | 34.0     | S2_10279728 - S2_32698493   | 0.2          | 5.1 | 17.5    | -0.7     | 0.3      | 0.43         | partially dominant |
| <i>qPROT-cim-2.3</i>               | 38.3     | S2_28049603 - S2_9984747    | 0.1          | 3.1 | 9.0     | -0.5     | 0.1      | 0.20         | additive           |
| <i>qPROT-cim-2.4</i>               | 102.9    | S2_4297468 - S2_13394656    | 0.4          | 4.0 | 11.8    | -0.5     | 0.4      | 0.80         | partially dominant |
| <i>qPROT-icim-2.2</i>              | 121.0    | S2_16519107 - S2_16348673   | 4.9          | 7.2 | 11.5    | -0.2     | -0.5     | -2.50        | recessive          |
| <i>qPROT-icim-3.1</i>              | 77.0     | S3_23614170 - S3_8195933    | 2.3          | 4.9 | 9.0     | 0.6      | 0.1      | 0.17         | additive           |
| <i>qPROT-icim-6.1</i>              | 85.0     | S6_3630897 - S6_11140261    | 0.5          | 3.5 | 7.7     | -0.6     | 0.2      | 0.33         | partially dominant |
| <i>qPROT-cim-11.1</i>              | 82.2     | S11_21017392 - S11_9883313  | 0.2          | 3.2 | 7.2     | -0.5     | 0.6      | 1.20         | dominant           |

| QTL name               | Position | Flanking markers            | QTL interval | LOD  | PVE (%) | <i>a</i> | <i>d</i> | <i>d</i> / <i> a </i> | Gene action        |
|------------------------|----------|-----------------------------|--------------|------|---------|----------|----------|-----------------------|--------------------|
| <i>qPROT-icim-11.1</i> | 91.0     | S11_38887609 - S11_29943293 | 0.7          | 3.8  | 7.9     | -0.5     | 0.2      | 0.40                  | partially dominant |
| <i>qPROT-cim-11.2</i>  | 95.4     | S11_31519207 - S11_30807675 | 0.5          | 3.0  | 3.3     | -0.4     | 0.5      | 1.25                  | over-dominant      |
| 100-seed weight        |          |                             |              |      |         |          |          |                       |                    |
| qSW-cim-1.1            | 16.4     | S1_7127752 - S1_5944791     | 14.7         | 7.4  | 10.4    | 0.9      | 0.4      | 0.42                  | partially dominant |
| qSW-icim-1.1           | 20.0     | S1_5944791 - S1_5173345     | 11.2         | 15.0 | 31.5    | 1.1      | 0.4      | 0.38                  | partially dominant |
| qSW-cim-6.1            | 26.4     | S6_4443721 - S6_4396204     | 3.1          | 3.4  | 8.3     | 0.5      | -0.2     | -0.32                 | recessive          |
| qSW-icim-6.1           | 95.0     | S6_14282225 - S6_14311546   | 0.8          | 2.7  | 4.8     | -0.2     | 0.5      | 2.21                  | over dominant      |
| qSW-icim-8.1           | 52.0     | S8_1664745 - S8_8700222     | 7.3          | 2.7  | 6.3     | 0.4      | -0.5     | -1.21                 | recessive          |
| qSW-icim-11.1          | 24.0     | S11_6210775 - S11_39507811  | 2.7          | 3.3  | 6.0     | 0.1      | 0.6      | 5.93                  | over dominant      |
| Seed yield             |          |                             |              |      |         |          |          |                       |                    |
| qSY-icim-1.1           | 29.0     | S1_5944791 - S1_5173345     | 11.2         | 3.2  | 6.6     | 0.7      | 19.8     | 26.57                 | over dominant      |
| qSY-icim-1.2           | 74.0     | S1_3905217 - S1_17462230    | 7.3          | 3.8  | 14.8    | -13.6    | -26.7    | -1.97                 | recessive          |
| qSY-icim-2.1           | 46.0     | S2_28723848 - S2_11947232   | 1.7          | 4.2  | 8.9     | -1.1     | 23.3     | 22.04                 | over dominant      |
| qSY-cim-2.1            | 126.3    | S2_8504401 - S2_4442599     | 0.4          | 2.9  | 8.2     | -7.0     | 19.0     | 2.71                  | over dominant      |
| qSY-icim-6.1           | 101.0    | S6_14311667 - S6_14388845   | 1.1          | 4.1  | 8.8     | 15.9     | -0.9     | -0.06                 | recessive          |
| Growth habit           |          |                             |              |      |         |          |          |                       |                    |
| qGH-cim-2.1            | 54.4     | S2_206675 - s2_1204754      | 0.5          | 2.8  | 20.7    | 0.2      | -0.2     | -1.04                 | recessive          |
| qGH-icim-2.1           | 64.0     | S2_9105026 - S2_22664490    | 0.2          | 2.7  | 3.9     | -0.1     | -0.2     | -1.27                 | recessive          |
| qGH-cim-3.1            | 5.0      | S3_21310513 - S3_28538775   | 7.5          | 2.9  | 9.3     | 0.1      | -0.2     | -2.02                 | recessive          |
| qGH-cim-3.2            | 14.5     | S3_28538775 - S3_21244595   | 10.4         | 4.9  | 19.6    | 0.1      | -0.3     | -3.45                 | recessive          |
| qGH-icim-3.1           | 20.0     | S3_24127385 - S3_21274904   | 1.4          | 4.4  | 12.0    | 0.1      | -0.2     | -1.62                 | recessive          |
| qGH-cim-3.3            | 23.7     | S3_20631155 - S3_22234078   | 2.4          | 15.2 | 47.0    | 0.3      | -0.3     | -0.94                 | recessive          |
| qGH-cim-3.4            | 34.3     | s3_20698771 - S3_18430894   | 2.3          | 22.1 | 5.0     | -0.3     | -0.3     | -0.98                 | recessive          |
| qGH-icim-3.2           | 35.0     | s3_20698771 - S3_18430894   | 2.3          | 29.1 | 61.6    | -0.4     | -0.3     | -0.80                 | recessive          |
| qGH-cim-3.5            | 46.6     | S3_18154848 - S3_17193829   | 6.0          | 11.3 | 42.1    | 0.3      | -0.2     | -0.72                 | recessive          |
| qGH-icim-4.1           | 27.0     | s4_496463 - S4_487510       | 2.1          | 2.6  | 13.1    | 0.3      | -0.2     | -0.70                 | recessive          |
| qGH-cim-11.1           | 24.9     | S11_6210775 - S11_39507811  | 2.7          | 4.6  | 27.2    | 0.2      | -0.3     | -1.98                 | recessive          |
| qGH-cim-11.2           | 54.6     | S11_4453854 - S11_4725362   | 0.8          | 3.0  | 3.4     | 0.1      | 0.0      | 0.35                  | partially dominant |

| QTL name                | Position | Flanking markers           | QTL interval | LOD | PVE (%) | <i>a</i> | <i>d</i> | <i>d/ a </i> | Gene action        |
|-------------------------|----------|----------------------------|--------------|-----|---------|----------|----------|--------------|--------------------|
| qGH-icim-11.1           | 64.0     | S11_8456082 - S11_44938548 | 0.6          | 4.1 | 14.0    | 0.2      | -0.4     | -1.73        | recessive          |
| Days to first flowering |          |                            |              |     |         |          |          |              |                    |
| qDFF-icim-3.1           | 24.0     | S3_22234078 - S3_16681929  | 5.7          | 6.6 | 12.6    | -4.7     | 2.2      | 0.48         | partially dominant |
| qDFF-cim-3.1            | 24.7     | S3_22234078 - S3_16681929  | 5.7          | 7.8 | 39.6    | -6.0     | 4.7      | 0.79         | partially dominant |
| qDFF-cim-3.2            | 34.3     | s3_20698771 - S3_18430894  | 2.3          | 7.8 | 4.6     | 5.2      | 4.0      | 0.76         | partially dominant |
| qDFF-cim-3.3            | 41.6     | S3_18430894 - S3_18154848  | 7.0          | 5.0 | 47.6    | -5.6     | 5.5      | 0.98         | dominant           |
| qDFF-cim-3.4            | 46.6     | S3_18154848 - S3_17193829  | 6.0          | 4.0 | 16.2    | -4.0     | 2.7      | 0.66         | partially dominant |
| qDFF-icim-3.2           | 117.0    | S3_14754306 - S3_8040710   | 3.3          | 3.4 | 7.9     | -2.6     | 3.6      | 1.35         | over dominant      |
| qDFF-icim-7.1           | 24.0     | S7_13036645 - S7_12034341  | 1.7          | 2.9 | 6.1     | 0.3      | -4.7     | -15.95       | recessive          |



**Supplementary Table S3.** Epistatic QTLs for seed protein content and agronomic traits identified using inclusive composite interval mapping (ICIM) in five pigeonpea F<sub>2</sub> populations

| Trait                        | Chr1 | Pos1 | LM1         | RM1         | Chr2 | Pos2 | LM2          | RM2          | LOD  | PVE (%) | [aa]  | [ad]  | [da]  | [dd] |
|------------------------------|------|------|-------------|-------------|------|------|--------------|--------------|------|---------|-------|-------|-------|------|
| Pop1 (ICP 11605 × ICP 14209) |      |      |             |             |      |      |              |              |      |         |       |       |       |      |
| DFP                          | 1    | 65   | S1_1798766  | S1_1906557  | 11   | 30   | S11_47645855 | S11_36456560 | 5.2  | 16.6    | 7.2   | -4.1  | 9.8   | 6.3  |
| GH                           | 1    | 35   | S1_2693194  | S1_4757043  | 2    | 80   | S2_24059431  | S2_24764841  | 5.0  | 27.2    | -0.2  | -0.2  | 0.4   | -0.3 |
| GH                           | 1    | 55   | S1_1575466  | S1_1798766  | 1    | 60   | S1_1798766   | S1_1906557   | 8.4  | 37.3    | -0.2  | -0.1  | 0.6   | -0.7 |
| GH                           | 1    | 70   | S1_1798766  | S1_1906557  | 3    | 65   | S3_17441541  | S3_21244595  | 14.0 | 70.2    | 0.0   | -0.4  | 0.4   | -0.9 |
| GH                           | 1    | 25   | S1_5093650  | S1_2693194  | 10   | 5    | S10_4461663  | S10_8216833  | 5.1  | 31.7    | -0.1  | 0.3   | -0.4  | -0.4 |
| SPC                          | 1    | 30   | S1_2693194  | S1_4757043  | 2    | 75   | S2_7491873   | S2_36672875  | 5.0  | 18.0    | -0.4  | 0.4   | -0.9  | 1.5  |
| SPC                          | 1    | 45   | S1_4757043  | S1_1575466  | 7    | 25   | S7_3522458   | S7_12010754  | 5.1  | 15.5    | 0.1   | -0.7  | -0.5  | 1.5  |
| SPC                          | 1    | 45   | S1_4757043  | S1_1575466  | 8    | 100  | S8_13310192  | S8_4675310   | 6.6  | 23.8    | 0.5   | -1.9  | -0.2  | 0.9  |
| SW                           | 1    | 40   | S1_4757043  | S1_1575466  | 2    | 85   | S2_36121093  | S2_36167974  | 5.3  | 14.7    | 0.1   | -0.8  | -0.1  | 1.2  |
| SW                           | 1    | 40   | S1_4757043  | S1_1575466  | 6    | 95   | S6_21393668  | S6_3159471   | 5.5  | 18.2    | -0.5  | -1.1  | 0.8   | 0.7  |
| SW                           | 1    | 0    | S1_7045823  | S1_4374250  | 7    | 85   | S7_6037045   | S7_6897487   | 5.5  | 17.2    | -0.3  | -1.1  | 0.3   | -0.1 |
| SY                           | 1    | 45   | S1_4757043  | S1_1575466  | 3    | 20   | S3_12603960  | S3_23502392  | 6.1  | 22.7    | 0.8   | -4.4  | -52.4 | 47.1 |
| SY                           | 1    | 60   | S1_1798766  | S1_1906557  | 10   | 75   | S10_259572   | S10_371125   | 6.5  | 24.7    | 17.5  | -33.0 | -25.1 | 21.3 |
| SY                           | 1    | 20   | S1_4757283  | S1_5093650  | 8    | 125  | S8_9535782   | S8_9669552   | 5.7  | 19.1    | 12.7  | 16.1  | 40.6  | 7.4  |
| GH                           | 2    | 20   | S2_16997696 | S2_10643268 | 4    | 0    | S4_2222488   | S4_2168590   | 5.0  | 9.4     | 0.0   | 0.2   | 0.0   | -0.3 |
| GH                           | 2    | 65   | S2_22546301 | S2_7491873  | 2    | 80   | S2_24059431  | S2_24764841  | 5.5  | 34.5    | -0.4  | 0.0   | -0.4  | 0.1  |
| GH                           | 2    | 80   | S2_24059431 | S2_24764841 | 7    | 15   | S7_12804834  | S7_18463975  | 5.3  | 21.9    | 0.0   | 0.4   | 0.1   | -0.5 |
| GH                           | 2    | 80   | S2_24059431 | S2_24764841 | 8    | 50   | S8_5791445   | S8_912171    | 9.0  | 36.9    | 0.1   | 0.7   | 0.1   | -0.2 |
| GH                           | 2    | 80   | S2_24059431 | S2_24764841 | 10   | 90   | S10_371125   | S10_190277   | 9.8  | 33.6    | 0.2   | 0.6   | 0.3   | -0.4 |
| GH                           | 2    | 80   | S2_24059431 | S2_24764841 | 11   | 210  | S11_25877230 | S11_29782823 | 9.3  | 30.1    | -0.4  | 0.0   | 0.1   | 0.6  |
| GH                           | 2    | 90   | S2_36167974 | S2_25553275 | 3    | 65   | S3_17441541  | S3_21244595  | 10.0 | 66.7    | 0.0   | -0.3  | 0.5   | -0.6 |
| GH                           | 2    | 90   | S2_36167974 | S2_25553275 | 6    | 10   | S6_6060973   | S6_12750333  | 5.7  | 33.7    | -0.2  | -0.5  | 0.3   | -0.2 |
| SW                           | 2    | 125  | S2_28755005 | S2_28751418 | 6    | 10   | S6_6060973   | S6_12750333  | 5.6  | 18.8    | -0.6  | -0.3  | -0.2  | -1.0 |
| SY                           | 2    | 10   | S2_16348673 | S2_16348917 | 5    | 5    | S5_2580750   | S5_4692912   | 5.2  | 15.8    | -17.1 | 3.4   | -10.7 | 37.0 |
| SY                           | 2    | 15   | S2_16348917 | S2_16997696 | 8    | 35   | S8_2049156   | S8_5791461   | 6.0  | 23.3    | -16.6 | 32.6  | -22.8 | 14.4 |

| Trait | Chr1 | Pos1 | LM1         | RM1         | Chr2 | Pos2 | LM2          | RM2          | LOD  | PVE (%) | [aa]  | [ad]  | [da]  | [dd]  |
|-------|------|------|-------------|-------------|------|------|--------------|--------------|------|---------|-------|-------|-------|-------|
| SY    | 2    | 20   | S2_16997696 | S2_10643268 | 6    | 55   | S6_11455119  | S6_11140261  | 5.2  | 18.0    | 20.3  | 30.4  | 28.7  | -0.7  |
| SY    | 2    | 55   | S2_29055808 | S2_15893512 | 10   | 85   | S10_371125   | S10_190277   | 6.2  | 23.0    | -0.8  | 17.5  | 26.6  | -43.8 |
| SY    | 2    | 145  | S2_29614491 | S2_36085710 | 11   | 225  | S11_25050893 | S11_30337861 | 5.6  | 24.7    | 28.2  | 37.6  | 27.2  | -11.2 |
| DFF   | 3    | 65   | S3_17441541 | S3_21244595 | 8    | 145  | S8_19166126  | S8_10333523  | 5.3  | 33.4    | 2.6   | 10.6  | 3.3   | -12.7 |
| DFF   | 3    | 160  | S3_20357542 | S3_925667   | 6    | 45   | S6_14282207  | S6_14236163  | 5.0  | 10.4    | 4.3   | 7.9   | 0.6   | -0.1  |
| GH    | 3    | 65   | S3_17441541 | S3_21244595 | 3    | 175  | S3_3913971   | S3_16727150  | 18.4 | 75.8    | 0.0   | 0.4   | 0.4   | -0.9  |
| GH    | 3    | 65   | S3_17441541 | S3_21244595 | 5    | 55   | S5_1264439   | S5_624899    | 14.3 | 76.0    | 0.0   | 0.5   | 0.3   | -0.7  |
| GH    | 3    | 65   | S3_17441541 | S3_21244595 | 6    | 90   | S6_21393668  | S6_3159471   | 7.8  | 56.2    | 0.1   | 0.2   | -0.2  | -0.3  |
| GH    | 3    | 65   | S3_17441541 | S3_21244595 | 7    | 5    | S7_15796777  | S7_19089666  | 17.7 | 79.5    | 0.2   | -0.3  | 0.5   | 0.2   |
| GH    | 3    | 65   | S3_17441541 | S3_21244595 | 8    | 25   | S8_11972776  | S8_2049156   | 11.9 | 76.4    | -0.2  | 0.1   | 0.6   | -0.7  |
| GH    | 3    | 65   | S3_17441541 | S3_21244595 | 9    | 10   | S9_9689272   | S9_10221364  | 6.6  | 66.7    | -0.2  | 0.2   | 0.4   | -0.6  |
| GH    | 3    | 65   | S3_17441541 | S3_21244595 | 10   | 5    | S10_4461663  | S10_8216833  | 14.0 | 79.6    | 0.0   | 0.3   | -0.4  | -0.9  |
| GH    | 3    | 65   | S3_17441541 | S3_21244595 | 11   | 180  | S11_23458079 | S11_20186519 | 9.3  | 57.2    | -0.1  | 0.4   | 0.0   | -0.4  |
| SPC   | 3    | 115  | S3_11310314 | S3_25423101 | 11   | 155  | S11_12420322 | S11_38211354 | 5.2  | 31.2    | -1.5  | -1.2  | -0.3  | 2.1   |
| SW    | 3    | 45   | S3_21275059 | S3_28586858 | 4    | 25   | S4_1521545   | S4_1311883   | 5.0  | 16.5    | -0.6  | -0.2  | -0.5  | 0.0   |
| SW    | 3    | 180  | S3_3913971  | S3_16727150 | 8    | 145  | S8_19166126  | S8_10333523  | 5.3  | 16.9    | -0.3  | -0.1  | -0.9  | 0.9   |
| SY    | 3    | 35   | S3_16632580 | S3_22917964 | 3    | 115  | S3_11310314  | S3_25423101  | 5.4  | 23.9    | -19.0 | -19.8 | 19.7  | 20.7  |
| SY    | 3    | 20   | S3_12603960 | S3_23502392 | 5    | 35   | S5_312017    | S5_1264439   | 5.1  | 27.2    | 9.4   | 35.3  | -9.5  | -43.0 |
| SY    | 3    | 35   | S3_16632580 | S3_22917964 | 11   | 150  | S11_20646142 | S11_20816375 | 7.8  | 35.2    | -15.0 | -17.6 | 4.7   | 54.2  |
| SY    | 3    | 170  | S3_16727124 | S3_8433349  | 6    | 60   | S6_21760159  | S6_11433399  | 5.2  | 18.1    | -10.8 | -33.9 | 20.2  | 13.9  |
| SY    | 3    | 125  | S3_23737567 | S3_8040710  | 7    | 60   | S7_722957    | S7_14067075  | 6.1  | 27.6    | 18.9  | 3.5   | 34.4  | 49.0  |
| SY    | 3    | 140  | S3_25398665 | S3_5325095  | 8    | 25   | S8_11972776  | S8_2049156   | 5.6  | 37.0    | -13.5 | -10.5 | 45.3  | -3.4  |
| SY    | 3    | 0    | S3_26745908 | S3_23529670 | 10   | 15   | S10_8216833  | S10_14964979 | 6.5  | 15.9    | -30.6 | 35.5  | -21.5 | 17.0  |
| SPC   | 4    | 55   | S4_4734626  | S4_9854357  | 6    | 95   | S6_21393668  | S6_3159471   | 5.1  | 17.3    | 0.0   | 1.0   | 0.8   | 1.0   |
| GH    | 5    | 20   | S5_4692888  | S5_312017   | 5    | 50   | S5_1264439   | S5_624899    | 7.8  | 37.9    | 0.0   | -0.3  | 0.3   | -0.8  |
| GH    | 5    | 55   | S5_1264439  | S5_624899   | 8    | 170  | S8_17346247  | S8_15097397  | 5.7  | 22.9    | 0.1   | 0.1   | 0.3   | -0.4  |
| GH    | 5    | 55   | S5_1264439  | S5_624899   | 10   | 90   | S10_371125   | S10_190277   | 5.0  | 23.0    | 0.1   | 0.3   | -0.4  | -0.3  |
| GH    | 5    | 45   | S5_312017   | S5_1264439  | 9    | 5    | S9_1280107   | S9_9689272   | 5.8  | 19.1    | 0.2   | -0.3  | 0.2   | -0.3  |

| Trait | Chr1 | Pos1 | LM1         | RM1         | Chr2 | Pos2 | LM2          | RM2          | LOD | PVE (%) | [aa]  | [ad]  | [da]  | [dd]  |
|-------|------|------|-------------|-------------|------|------|--------------|--------------|-----|---------|-------|-------|-------|-------|
| GH    | 5    | 40   | S5_312017   | S5_1264439  | 11   | 50   | S11_33138038 | S11_39568168 | 5.8 | 20.6    | 0.2   | -0.2  | -0.5  | 0.0   |
| SPC   | 5    | 20   | S5_4692888  | S5_312017   | 6    | 35   | S6_14335733  | S6_14282201  | 5.5 | 19.0    | 0.9   | 0.6   | -0.3  | 1.4   |
| SW    | 5    | 60   | S5_1264439  | S5_624899   | 10   | 75   | S10_259572   | S10_371125   | 5.1 | 14.6    | 0.2   | -1.3  | -0.4  | 0.1   |
| SY    | 5    | 0    | S5_2580221  | S5_2580750  | 8    | 95   | S8_6388803   | S8_9452602   | 5.3 | 20.7    | 41.5  | 4.1   | -0.6  | 22.0  |
| SY    | 5    | 0    | S5_2580221  | S5_2580750  | 10   | 15   | S10_8216833  | S10_14964979 | 5.5 | 12.9    | -21.3 | 23.5  | -34.5 | 55.2  |
| GH    | 6    | 45   | S6_14282207 | S6_14236163 | 6    | 80   | S6_14551548  | S6_22264720  | 5.2 | 12.5    | 0.0   | 0.2   | 0.3   | -0.2  |
| GH    | 6    | 85   | S6_22264720 | S6_21393668 | 11   | 105  | S11_6013633  | S11_27172559 | 5.9 | 18.6    | -0.2  | 0.3   | -0.3  | -0.4  |
| GH    | 6    | 10   | S6_6060973  | S6_12750333 | 9    | 5    | S9_1280107   | S9_9689272   | 5.1 | 19.3    | 0.1   | -0.2  | 0.5   | -0.3  |
| SPC   | 6    | 15   | S6_14310524 | S6_14313152 | 8    | 185  | S8_14218715  | S8_15026624  | 5.2 | 16.7    | 0.3   | -0.6  | 1.0   | 0.5   |
| SPC   | 6    | 60   | S6_21760159 | S6_11433399 | 6    | 85   | S6_22264720  | S6_21393668  | 5.4 | 25.7    | -1.0  | -2.9  | 0.5   | 0.2   |
| SW    | 6    | 65   | S6_6237148  | S6_16682610 | 8    | 145  | S8_19166126  | S8_10333523  | 5.1 | 25.1    | -0.2  | -0.9  | -1.1  | 0.4   |
| SY    | 6    | 60   | S6_21760159 | S6_11433399 | 8    | 35   | S8_2049156   | S8_5791461   | 6.4 | 23.9    | -9.9  | 14.4  | -28.0 | 36.1  |
| SY    | 6    | 60   | S6_21760159 | S6_11433399 | 11   | 80   | S11_9768472  | S11_24859358 | 5.3 | 17.8    | -8.3  | 15.5  | -28.9 | 43.9  |
| SY    | 6    | 85   | S6_22264720 | S6_21393668 | 10   | 5    | S10_4461663  | S10_8216833  | 5.6 | 22.3    | -17.3 | 23.8  | -29.3 | 13.0  |
| DFF   | 7    | 20   | S7_3522458  | S7_12010754 | 9    | 60   | S9_8998000   | S9_5312289   | 5.4 | 18.2    | -4.8  | -0.6  | -8.4  | -13.3 |
| DFF   | 7    | 20   | S7_3522458  | S7_12010754 | 11   | 70   | S11_14777000 | S11_30776997 | 5.5 | 17.6    | 2.9   | 4.9   | 9.7   | -5.4  |
| GH    | 7    | 65   | S7_14067075 | S7_14683829 | 8    | 60   | S8_1666164   | S8_1664745   | 5.5 | 19.2    | 0.1   | 0.0   | -0.3  | -0.1  |
| GH    | 7    | 5    | S7_15796777 | S7_19089666 | 7    | 25   | S7_3522458   | S7_12010754  | 5.3 | 32.8    | 0.0   | 0.5   | -0.1  | -0.3  |
| GH    | 7    | 5    | S7_15796777 | S7_19089666 | 9    | 15   | S9_10221364  | S9_1358645   | 6.6 | 26.3    | 0.1   | -0.5  | 0.1   | -0.2  |
| GH    | 7    | 20   | S7_3522458  | S7_12010754 | 10   | 5    | S10_4461663  | S10_8216833  | 8.9 | 35.3    | 0.1   | -0.3  | -0.5  | -0.3  |
| SPC   | 7    | 30   | S7_18419460 | S7_15005750 | 8    | 85   | S8_10556549  | S8_19075759  | 5.2 | 12.8    | 0.1   | -0.9  | -1.3  | -1.0  |
| SPC   | 7    | 75   | S7_6012566  | S7_9034247  | 11   | 90   | S11_23469021 | S11_46615058 | 5.6 | 22.3    | 0.8   | -0.2  | 0.2   | 1.4   |
| SY    | 7    | 55   | S7_18464007 | S7_12836334 | 8    | 25   | S8_11972776  | S8_2049156   | 5.8 | 32.7    | 17.4  | -45.4 | -6.5  | -16.6 |
| SY    | 7    | 60   | S7_722957   | S7_14067075 | 11   | 150  | S11_20646142 | S11_20816375 | 5.4 | 26.1    | 12.2  | 39.4  | 12.0  | 21.8  |
| GH    | 8    | 30   | S8_11972776 | S8_2049156  | 10   | 20   | S10_14964979 | S10_7161105  | 7.8 | 29.3    | 0.2   | 0.3   | 0.6   | -0.3  |
| GH    | 8    | 100  | S8_13310192 | S8_4675310  | 11   | 210  | S11_25877230 | S11_29782823 | 6.4 | 23.9    | 0.4   | 0.0   | 0.1   | 0.4   |
| GH    | 8    | 135  | S8_4533965  | S8_14798091 | 9    | 25   | S9_9670150   | S9_9689983   | 5.5 | 17.4    | -0.3  | -0.2  | 0.1   | 0.5   |
| GH    | 8    | 115  | S8_6353157  | S8_1284456  | 8    | 120  | S8_13150686  | S8_9535782   | 9.6 | 32.5    | -0.4  | 0.2   | 0.1   | 0.4   |

| Trait                       | Chr1 | Pos1 | LM1          | RM1          | Chr2 | Pos2 | LM2          | RM2          | LOD  | PVE (%) | [aa]  | [ad]  | [da]  | [dd]  |
|-----------------------------|------|------|--------------|--------------|------|------|--------------|--------------|------|---------|-------|-------|-------|-------|
| SPC                         | 8    | 30   | S8_11972776  | S8_2049156   | 11   | 195  | S11_8456046  | S11_39507811 | 5.5  | 24.4    | -0.1  | -1.1  | -0.3  | -1.7  |
| SY                          | 8    | 25   | S8_11972776  | S8_2049156   | 8    | 95   | S8_6388803   | S8_9452602   | 6.4  | 31.0    | -16.6 | -44.0 | 1.7   | 56.8  |
| SY                          | 8    | 150  | S8_10333523  | S8_4867754   | 11   | 150  | S11_20646142 | S11_20816375 | 6.8  | 27.8    | -24.4 | -29.2 | 13.6  | 23.0  |
| SY                          | 8    | 35   | S8_2049156   | S8_5791461   | 9    | 40   | S9_10229309  | S9_7755937   | 6.9  | 38.7    | -30.0 | -3.9  | -13.5 | 72.0  |
| SY                          | 8    | 40   | S8_2049156   | S8_5791461   | 10   | 75   | S10_259572   | S10_371125   | 7.8  | 38.5    | 23.9  | -26.0 | -8.3  | 53.2  |
| GH                          | 9    | 5    | S9_1280107   | S9_9689272   | 10   | 20   | S10_14964979 | S10_7161105  | 7.5  | 31.6    | -0.3  | -0.3  | 0.7   | -0.5  |
| GH                          | 10   | 5    | S10_4461663  | S10_8216833  | 10   | 20   | S10_14964979 | S10_7161105  | 10.7 | 41.6    | 0.0   | -0.4  | 0.5   | -0.8  |
| GH                          | 10   | 5    | S10_4461663  | S10_8216833  | 11   | 145  | S11_32081128 | S11_5166783  | 6.2  | 35.7    | -0.2  | 0.5   | -0.1  | -0.2  |
| SY                          | 10   | 75   | S10_259572   | S10_371125   | 11   | 160  | S11_38929174 | S11_23233620 | 8.2  | 28.0    | -28.8 | -12.4 | 34.0  | 34.8  |
| SY                          | 10   | 15   | S10_8216833  | S10_14964979 | 10   | 50   | S10_4202839  | S10_1984771  | 6.2  | 16.8    | 28.2  | -27.8 | -40.0 | 16.0  |
| GH                          | 11   | 15   | S11_5868042  | S11_40289708 | 11   | 85   | S11_9768477  | S11_27172500 | 6.1  | 17.7    | 0.0   | 0.1   | -0.5  | -0.5  |
| SY                          | 11   | 95   | S11_11359055 | S11_7007425  | 11   | 150  | S11_20646142 | S11_20816375 | 5.3  | 36.4    | -3.3  | -19.5 | 23.7  | 65.8  |
| Pop2 (ICP 8863 × ICP 11605) |      |      |              |              |      |      |              |              |      |         |       |       |       |       |
| DFF                         | 1    | 35   | S1_12899653  | S1_11050274  | 7    | 55   | S7_12804834  | S7_6897487   | 5.1  | 20.7    | 4.9   | -11.7 | -0.5  | 9.8   |
| DFF                         | 1    | 170  | S1_13431148  | S1_14032441  | 10   | 50   | S10_21497752 | S10_18083837 | 6.8  | 20.4    | -1.9  | 1.5   | 12.1  | -19.8 |
| DFF                         | 1    | 85   | S1_14083660  | S1_3905212   | 2    | 140  | S2_13394806  | S2_35442671  | 5.3  | 16.9    | -4.9  | -8.2  | 3.7   | 13.0  |
| DFF                         | 1    | 80   | S1_652229    | S1_14083660  | 6    | 55   | S6_15449552  | S6_18295388  | 5.4  | 21.2    | -2.9  | -8.4  | 7.5   | 10.2  |
| DFF                         | 1    | 80   | S1_652229    | S1_14083660  | 9    | 50   | S9_7755937   | S9_7756050   | 5.7  | 21.9    | 6.6   | -7.5  | -6.1  | 2.7   |
| DFF                         | 1    | 80   | S1_652229    | S1_14083660  | 8    | 5    | S8_4714912   | S8_11776420  | 6.2  | 26.2    | 7.0   | -4.0  | -9.7  | -2.2  |
| DFF                         | 1    | 120  | S1_9842833   | S1_1158656   | 3    | 110  | S3_8040710   | S3_9200641   | 5.6  | 24.3    | 6.6   | -8.6  | -17.1 | -2.5  |
| GH                          | 1    | 140  | S1_10689415  | S1_556023    | 6    | 25   | S6_6237148   | S6_14282225  | 6.5  | 13.4    | 0.3   | -0.1  | 0.0   | 0.3   |
| GH                          | 1    | 135  | S1_10689415  | S1_556023    | 3    | 25   | S3_21244595  | S3_18933167  | 8.8  | 35.2    | -0.1  | 0.6   | 0.3   | -0.6  |
| GH                          | 1    | 155  | S1_12591177  | S1_13431089  | 10   | 135  | S10_17099642 | S10_6765628  | 11.1 | 18.9    | 0.1   | 0.1   | -0.6  | -0.4  |
| GH                          | 1    | 155  | S1_12591177  | S1_13431089  | 11   | 90   | S11_39309852 | S11_28894118 | 9.3  | 21.4    | 0.0   | 0.2   | -0.6  | -0.5  |
| GH                          | 1    | 5    | S1_16910575  | S1_16294075  | 2    | 15   | S2_20782748  | S2_36429055  | 9.0  | 16.9    | 0.3   | -0.2  | -0.3  | 0.1   |
| GH                          | 1    | 10   | S1_4759267   | S1_15329865  | 7    | 5    | S7_18419460  | S7_6037045   | 7.2  | 16.7    | 0.2   | -0.3  | -0.2  | 0.1   |
| GH                          | 1    | 10   | S1_4759267   | S1_15329865  | 8    | 60   | S8_11838449  | S8_11838448  | 5.9  | 19.2    | 0.2   | -0.3  | -0.1  | 0.5   |
| GH                          | 1    | 10   | S1_4759267   | S1_15329865  | 1    | 80   | S1_652229    | S1_14083660  | 6.4  | 20.9    | 0.2   | -0.3  | -0.1  | 0.5   |

| Trait | Chr1 | Pos1 | LM1         | RM1         | Chr2 | Pos2 | LM2          | RM2          | LOD  | PVE (%) | [aa]  | [ad] | [da]  | [dd]  |
|-------|------|------|-------------|-------------|------|------|--------------|--------------|------|---------|-------|------|-------|-------|
| GH    | 1    | 80   | S1_652229   | S1_14083660 | 4    | 0    | S4_2849401   | S4_2014532   | 6.5  | 15.6    | 0.1   | -0.2 | -0.4  | 0.1   |
| GH    | 1    | 80   | S1_652229   | S1_14083660 | 9    | 75   | S9_10177047  | S9_10172092  | 6.8  | 20.9    | -0.4  | 0.2  | -0.2  | 0.6   |
| GH    | 1    | 80   | S1_652229   | S1_14083660 | 5    | 25   | S5_4692912   | S5_4199522   | 12.3 | 37.0    | -0.2  | 0.3  | -0.5  | 0.3   |
| SPC   | 1    | 55   | S1_5552696  | S1_3905151  | 10   | 155  | S10_19001995 | S10_7783201  | 5.5  | 60.5    | -1.1  | 1.1  | 1.1   | 1.9   |
| SW    | 1    | 75   | S1_10466763 | S1_3905220  | 2    | 120  | S2_21890021  | S2_7683449   | 16.2 | 34.0    | 0.2   | 0.2  | 5.1   | -5.5  |
| SW    | 1    | 40   | S1_11050274 | S1_748256   | 3    | 0    | S3_22234078  | S3_19578263  | 13.8 | 31.9    | 0.1   | 5.2  | -0.4  | -5.0  |
| SW    | 1    | 40   | S1_11050274 | S1_748256   | 6    | 70   | S6_18322873  | S6_18322737  | 11.4 | 32.0    | -0.2  | 5.2  | 0.4   | -4.7  |
| SW    | 1    | 40   | S1_11050274 | S1_748256   | 4    | 15   | S4_1521545   | S4_1710877   | 9.8  | 32.9    | 2.6   | -2.2 | -2.3  | 2.3   |
| SW    | 1    | 95   | S1_14067713 | S1_9603077  | 7    | 10   | S7_6037077   | S7_18542722  | 13.9 | 32.9    | -2.8  | 2.2  | -2.8  | 2.6   |
| SW    | 1    | 95   | S1_14067713 | S1_9603077  | 8    | 10   | S8_4714912   | S8_11776420  | 10.6 | 39.0    | -2.1  | 3.3  | -2.2  | 2.9   |
| SW    | 1    | 100  | S1_14069006 | S1_9863131  | 5    | 5    | S5_5120324   | S5_4692888   | 14.1 | 29.8    | -2.5  | -2.6 | 2.5   | 2.6   |
| SW    | 1    | 85   | S1_14083660 | S1_3905212  | 11   | 110  | S11_27472029 | S11_20186519 | 15.1 | 36.1    | 2.6   | 2.9  | 3.1   | 2.3   |
| SW    | 1    | 5    | S1_16910575 | S1_16294075 | 1    | 10   | S1_4759267   | S1_15329865  | 15.6 | 40.7    | -2.1  | 2.8  | -2.1  | 2.9   |
| SW    | 1    | 10   | S1_4759267  | S1_15329865 | 9    | 25   | S9_1280000   | S9_7212583   | 16.7 | 39.8    | 2.6   | 3.0  | 2.1   | 2.0   |
| SW    | 1    | 10   | S1_4759267  | S1_15329865 | 10   | 40   | S10_21497771 | S10_13762076 | 16.6 | 41.8    | 2.5   | 3.3  | 2.3   | 2.7   |
| SY    | 1    | 10   | S1_4759267  | S1_15329865 | 10   | 200  | S10_7783201  | S10_5097784  | 6.2  | 35.6    | 14.3  | -0.2 | 31.8  | -13.1 |
| SY    | 1    | 170  | S1_13431148 | S1_14032441 | 7    | 40   | S7_10467966  | S7_12804834  | 5.4  | 13.0    | 9.5   | 13.4 | 1.2   | 22.1  |
| SY    | 1    | 95   | S1_14067713 | S1_9603077  | 1    | 140  | S1_10689415  | S1_556023    | 6.2  | 19.1    | 13.0  | 10.1 | 18.4  | 17.7  |
| SY    | 1    | 60   | S1_3905151  | S1_5414823  | 3    | 20   | S3_28933239  | S3_21244595  | 5.1  | 11.5    | 2.8   | -0.7 | 11.2  | -29.7 |
| SY    | 1    | 10   | S1_4759267  | S1_15329865 | 11   | 65   | S11_30337861 | S11_12765240 | 6.6  | 30.7    | -12.8 | 14.3 | -28.9 | -21.7 |
| DFF   | 2    | 170  | S2_13394818 | S2_26969919 | 11   | 145  | S11_20304380 | S11_38654219 | 5.3  | 14.8    | -8.3  | 4.1  | -4.0  | 4.5   |
| DFF   | 2    | 170  | S2_13394818 | S2_26969919 | 9    | 50   | S9_7755937   | S9_7756050   | 5.5  | 16.9    | -5.6  | 1.6  | -6.7  | 11.6  |
| DFF   | 2    | 15   | S2_20782748 | S2_36429055 | 10   | 55   | S10_18083837 | S10_17801329 | 6.0  | 26.6    | -2.3  | -4.1 | 13.7  | -17.6 |
| DFF   | 2    | 5    | S2_20782748 | S2_36429055 | 3    | 35   | S3_18933167  | S3_18929445  | 5.0  | 44.3    | 1.5   | 15.8 | 2.9   | -3.6  |
| DFF   | 2    | 95   | S2_35584049 | S2_22473218 | 2    | 185  | S2_25523315  | S2_28049878  | 5.7  | 34.9    | -5.7  | 27.4 | 5.3   | -10.4 |
| GH    | 2    | 130  | S2_10607410 | S2_32197339 | 11   | 90   | S11_39309852 | S11_28894118 | 8.5  | 17.4    | 0.3   | 0.4  | 0.4   | 0.1   |
| GH    | 2    | 75   | S2_16111815 | S2_21929010 | 8    | 65   | S8_11838449  | S8_11838448  | 6.4  | 13.7    | 0.3   | -0.2 | -0.1  | 0.4   |
| GH    | 2    | 60   | S2_19392675 | S2_13388933 | 7    | 90   | S7_14683829  | S7_9034247   | 6.6  | 13.8    | 0.1   | 0.4  | 0.0   | -0.6  |

| Trait | Chr1 | Pos1 | LM1         | RM1         | Chr2 | Pos2 | LM2          | RM2          | LOD  | PVE (%) | [aa]  | [ad]  | [da]  | [dd]  |
|-------|------|------|-------------|-------------|------|------|--------------|--------------|------|---------|-------|-------|-------|-------|
| GH    | 2    | 10   | S2_20782748 | S2_36429055 | 9    | 70   | S9_10229309  | S9_10177047  | 5.9  | 19.6    | 0.1   | -0.3  | 0.0   | 0.7   |
| GH    | 2    | 15   | S2_20782748 | S2_36429055 | 2    | 35   | S2_36429066  | S2_19392689  | 7.0  | 22.4    | -0.2  | 0.5   | -0.2  | -0.4  |
| GH    | 2    | 10   | S2_20782748 | S2_36429055 | 5    | 30   | S5_4692912   | S5_4199522   | 6.3  | 24.2    | 0.1   | -0.4  | -0.4  | 0.0   |
| GH    | 2    | 115  | S2_21890021 | S2_7683449  | 10   | 135  | S10_17099642 | S10_6765628  | 11.4 | 20.7    | 0.0   | 0.1   | -0.6  | -0.6  |
| GH    | 2    | 145  | S2_32807766 | S2_7683443  | 6    | 40   | S6_14282226  | S6_14335833  | 5.4  | 13.0    | 0.1   | -0.4  | 0.0   | -0.5  |
| GH    | 2    | 90   | S2_35584049 | S2_22473218 | 4    | 0    | S4_2849401   | S4_2014532   | 6.5  | 10.4    | 0.3   | -0.2  | -0.3  | 0.2   |
| GH    | 2    | 35   | S2_36429066 | S2_19392689 | 3    | 45   | S3_18929445  | S3_18929378  | 15.8 | 59.8    | -0.3  | 0.1   | 0.6   | -0.5  |
| SPC   | 2    | 80   | S2_22473129 | S2_18386711 | 10   | 155  | S10_19001995 | S10_7783201  | 6.3  | 67.0    | 0.0   | -2.9  | 1.6   | 2.5   |
| SW    | 2    | 80   | S2_22473129 | S2_18386711 | 3    | 0    | S3_22234078  | S3_19578263  | 14.6 | 31.9    | -0.2  | 5.2   | 0.2   | -4.5  |
| SW    | 2    | 80   | S2_22473129 | S2_18386711 | 4    | 25   | S4_1710877   | S4_839628    | 15.3 | 33.7    | 2.7   | -2.1  | -2.1  | 2.1   |
| SW    | 2    | 80   | S2_22473129 | S2_18386711 | 2    | 115  | S2_21890021  | S2_7683449   | 15.5 | 34.1    | -2.5  | -2.5  | 3.0   | 2.2   |
| SW    | 2    | 55   | S2_19392675 | S2_13388933 | 9    | 75   | S9_10177047  | S9_10172092  | 13.6 | 32.2    | 0.3   | 4.8   | 0.0   | -5.7  |
| SW    | 2    | 60   | S2_19392675 | S2_13388933 | 5    | 10   | S5_4692912   | S5_4199522   | 17.1 | 36.5    | -2.7  | -2.3  | 3.3   | 1.3   |
| SW    | 2    | 115  | S2_21890021 | S2_7683449  | 6    | 65   | S6_18295384  | S6_18322776  | 13.9 | 35.8    | -2.4  | 2.9   | -2.4  | 3.2   |
| SW    | 2    | 125  | S2_34204720 | S2_7683447  | 11   | 15   | S11_27612418 | S11_32832892 | 16.0 | 31.9    | -0.1  | 5.3   | -0.2  | -4.3  |
| SW    | 2    | 125  | S2_34204720 | S2_7683447  | 7    | 5    | S7_18419460  | S7_6037045   | 15.8 | 32.7    | 2.7   | -2.1  | -2.8  | 2.7   |
| SW    | 2    | 95   | S2_35584049 | S2_22473218 | 8    | 30   | S8_11776408  | S8_11838449  | 14.4 | 38.9    | 2.9   | -2.4  | -3.0  | 1.3   |
| SW    | 2    | 40   | S2_36429066 | S2_19392689 | 10   | 130  | S10_18083991 | S10_17099642 | 13.9 | 34.8    | -2.6  | -2.7  | 3.0   | 1.5   |
| SY    | 2    | 130  | S2_10607410 | S2_32197339 | 2    | 150  | S2_36008860  | S2_32734003  | 5.0  | 17.0    | 3.6   | 7.4   | -16.0 | -43.1 |
| SY    | 2    | 0    | S2_20782748 | S2_36429055 | 6    | 5    | S6_2496170   | S6_6237148   | 5.3  | 14.0    | -6.5  | 2.4   | -12.5 | 23.7  |
| SY    | 2    | 10   | S2_20782748 | S2_36429055 | 10   | 110  | S10_8438690  | S10_13626722 | 6.3  | 26.0    | -23.7 | 0.8   | -4.6  | 9.3   |
| SY    | 2    | 15   | S2_20782748 | S2_36429055 | 11   | 110  | S11_27472029 | S11_20186519 | 5.5  | 27.3    | -8.7  | -0.5  | -39.8 | 2.2   |
| SY    | 2    | 120  | S2_21890021 | S2_7683449  | 7    | 0    | S7_18419460  | S7_6037045   | 5.5  | 10.6    | -21.2 | 0.2   | 20.9  | 7.8   |
| SY    | 2    | 120  | S2_21890021 | S2_7683449  | 8    | 25   | S8_11776420  | S8_11776408  | 5.2  | 11.4    | 5.6   | 30.3  | -18.8 | -11.8 |
| SY    | 2    | 160  | S2_36164833 | S2_16111897 | 3    | 5    | S3_19578263  | S3_21274904  | 7.3  | 36.4    | -7.6  | -39.4 | 8.4   | -12.5 |
| DFF   | 3    | 135  | S3_8772530  | S3_1358533  | 11   | 150  | S11_22893601 | S11_10881649 | 5.8  | 22.9    | -7.8  | -11.9 | 4.3   | 1.7   |
| DFF   | 3    | 80   | S3_14758073 | S3_11310314 | 8    | 5    | S8_4714912   | S8_11776420  | 6.2  | 25.9    | -7.2  | 0.8   | -8.4  | 5.3   |
| DFF   | 3    | 75   | S3_14758073 | S3_11310314 | 6    | 25   | S6_6237148   | S6_14282225  | 5.9  | 27.4    | 6.1   | 6.7   | 9.7   | 9.2   |

| Trait | Chr1 | Pos1 | LM1         | RM1         | Chr2 | Pos2 | LM2          | RM2          | LOD    | PVE (%) | [aa] | [ad] | [da] | [dd]  |
|-------|------|------|-------------|-------------|------|------|--------------|--------------|--------|---------|------|------|------|-------|
| DFP   | 3    | 5    | S3_19578263 | S3_21274904 | 10   | 55   | S10_18083837 | S10_17801329 | 6.8    | 23.2    | 0.4  | 0.4  | 17.9 | -12.6 |
| GH    | 3    | 45   | S3_18929445 | S3_18929378 | 6    | 25   | S6_6237148   | S6_14282225  | 5.3    | 39.1    | 0.0  | -0.4 | 0.0  | 0.2   |
| GH    | 3    | 45   | S3_18929445 | S3_18929378 | 11   | 55   | S11_33954110 | S11_42065843 | 12.9   | 55.4    | 0.3  | 0.6  | 0.3  | -0.1  |
| GH    | 3    | 45   | S3_18929445 | S3_18929378 | 5    | 25   | S5_4692912   | S5_4199522   | 15.4   | 63.7    | 0.0  | 0.4  | -0.5 | 0.1   |
| GH    | 3    | 30   | S3_21244595 | S3_18933167 | 8    | 60   | S8_11838449  | S8_11838448  | 7.5    | 38.2    | 0.0  | 0.3  | 0.4  | -0.7  |
| GH    | 3    | 25   | S3_21244595 | S3_18933167 | 10   | 25   | S10_14148444 | S10_12011468 | 14.1   | 45.2    | -0.2 | 0.2  | -0.5 | -0.4  |
| GH    | 3    | 20   | S3_28933239 | S3_21244595 | 9    | 35   | S9_7212583   | S9_7755937   | 7.0    | 47.3    | 0.2  | 0.1  | -0.5 | -0.5  |
| GH    | 3    | 20   | S3_28933239 | S3_21244595 | 3    | 45   | S3_18929445  | S3_18929378  | 1132.5 | 99.4    | 0.0  | 0.0  | -1.0 | 0.0   |
| SPC   | 3    | 130  | S3_8772530  | S3_1358533  | 10   | 155  | S10_19001995 | S10_7783201  | 5.5    | 67.4    | -1.1 | -0.1 | 1.1  | -0.6  |
| SW    | 3    | 90   | S3_11310314 | S3_10301855 | 9    | 20   | S9_1280000   | S9_7212583   | 13.1   | 31.4    | 2.6  | 2.5  | 2.5  | 2.6   |
| SW    | 3    | 90   | S3_11310314 | S3_10301855 | 11   | 110  | S11_27472029 | S11_20186519 | 14.6   | 32.4    | 2.7  | 2.5  | 3.0  | 3.0   |
| SW    | 3    | 70   | S3_14758073 | S3_11310314 | 4    | 15   | S4_1521545   | S4_1710877   | 11.1   | 34.6    | 2.4  | -1.9 | -2.3 | 2.6   |
| SW    | 3    | 75   | S3_14758073 | S3_11310314 | 7    | 50   | S7_12804834  | S7_6897487   | 10.1   | 35.0    | 0.1  | 5.3  | 0.1  | -4.7  |
| SW    | 3    | 80   | S3_14758073 | S3_11310314 | 10   | 25   | S10_14148444 | S10_12011468 | 15.2   | 35.7    | 2.5  | 3.0  | 2.0  | 2.8   |
| SW    | 3    | 75   | S3_14758073 | S3_11310314 | 6    | 0    | S6_2496170   | S6_6237148   | 7.8    | 35.8    | -2.8 | 2.9  | -2.5 | 2.0   |
| SW    | 3    | 30   | S3_21244595 | S3_18933167 | 3    | 45   | S3_18929445  | S3_18929378  | 14.5   | 31.1    | -2.6 | -2.7 | 2.8  | 3.2   |
| SW    | 3    | 10   | S3_21274904 | S3_28538775 | 8    | 40   | S8_11776408  | S8_11838449  | 14.4   | 34.6    | -0.1 | -0.5 | 5.0  | -5.5  |
| SW    | 3    | 0    | S3_22234078 | S3_19578263 | 5    | 35   | S5_4692912   | S5_4199522   | 14.7   | 33.6    | 0.3  | 0.1  | -5.2 | -5.1  |
| SY    | 3    | 5    | S3_19578263 | S3_21274904 | 10   | 120  | S10_13626722 | S10_18083991 | 5.5    | 32.3    | 7.0  | 7.1  | 23.0 | -42.2 |
| SY    | 3    | 0    | S3_22234078 | S3_19578263 | 3    | 25   | S3_21244595  | S3_18933167  | 5.3    | 19.1    | 6.8  | 2.3  | 30.9 | -54.8 |
| GH    | 4    | 10   | S4_2849401  | S4_2014532  | 4    | 25   | S4_1710877   | S4_839628    | 5.7    | 10.8    | -0.1 | -0.6 | 0.4  | 0.0   |
| GH    | 4    | 5    | S4_2849401  | S4_2014532  | 9    | 70   | S9_10229309  | S9_10177047  | 6.0    | 10.9    | 0.2  | -0.2 | -0.1 | 0.2   |
| GH    | 4    | 0    | S4_2849401  | S4_2014532  | 11   | 90   | S11_39309852 | S11_28894118 | 9.1    | 14.5    | -0.3 | -0.3 | 0.3  | 0.4   |
| GH    | 4    | 5    | S4_2849401  | S4_2014532  | 7    | 5    | S7_18419460  | S7_6037045   | 5.7    | 15.8    | 0.2  | -0.2 | -0.3 | -0.1  |
| GH    | 4    | 5    | S4_2849401  | S4_2014532  | 10   | 135  | S10_17099642 | S10_6765628  | 8.1    | 16.6    | -0.3 | -0.3 | 0.4  | 0.3   |
| GH    | 4    | 5    | S4_2849401  | S4_2014532  | 6    | 25   | S6_6237148   | S6_14282225  | 5.7    | 20.1    | 0.2  | -0.1 | -0.2 | 0.6   |
| GH    | 4    | 5    | S4_2849401  | S4_2014532  | 5    | 25   | S5_4692912   | S5_4199522   | 5.0    | 20.6    | 0.1  | -0.5 | -0.3 | 0.0   |
| SW    | 4    | 15   | S4_1521545  | S4_1710877  | 5    | 35   | S5_4692912   | S5_4199522   | 11.6   | 33.5    | -2.5 | -2.9 | 2.3  | 2.2   |

| Trait | Chr1 | Pos1 | LM1         | RM1         | Chr2 | Pos2 | LM2          | RM2          | LOD  | PVE (%) | [aa] | [ad]  | [da] | [dd] |
|-------|------|------|-------------|-------------|------|------|--------------|--------------|------|---------|------|-------|------|------|
| SW    | 4    | 15   | S4_1521545  | S4_1710877  | 4    | 25   | S4_1710877   | S4_839628    | 15.4 | 35.3    | -2.5 | -3.3  | 2.2  | 2.7  |
| SW    | 4    | 20   | S4_1710877  | S4_839628   | 10   | 40   | S10_21497771 | S10_13762076 | 11.7 | 32.6    | -2.4 | -2.2  | 2.4  | 3.0  |
| SW    | 4    | 20   | S4_1710877  | S4_839628   | 9    | 20   | S9_1280000   | S9_7212583   | 11.7 | 36.0    | -2.3 | -1.9  | 2.9  | 3.4  |
| SW    | 4    | 25   | S4_1710877  | S4_839628   | 11   | 55   | S11_33954110 | S11_42065843 | 12.0 | 36.0    | -3.0 | -2.5  | 2.1  | 1.7  |
| GH    | 5    | 10   | S5_4692912  | S5_4199522  | 11   | 90   | S11_39309852 | S11_28894118 | 8.8  | 15.1    | -0.2 | -0.3  | 0.4  | 0.2  |
| GH    | 5    | 20   | S5_4692912  | S5_4199522  | 5    | 35   | S5_4692912   | S5_4199522   | 8.8  | 27.6    | 0.1  | 0.4   | -0.3 | -0.7 |
| GH    | 5    | 30   | S5_4692912  | S5_4199522  | 10   | 150  | S10_19001995 | S10_7783201  | 12.0 | 40.7    | -0.2 | -0.6  | 0.5  | 0.1  |
| SPC   | 5    | 30   | S5_4692912  | S5_4199522  | 6    | 5    | S6_2496170   | S6_6237148   | 6.0  | 55.0    | 0.0  | 1.5   | -0.6 | 3.6  |
| SPC   | 5    | 25   | S5_4692912  | S5_4199522  | 10   | 155  | S10_19001995 | S10_7783201  | 6.1  | 64.8    | -0.2 | 0.9   | 0.6  | 4.1  |
| SW    | 5    | 20   | S5_4692912  | S5_4199522  | 10   | 115  | S10_13626722 | S10_18083991 | 15.0 | 32.5    | -2.5 | 2.5   | -2.8 | 3.2  |
| SW    | 5    | 20   | S5_4692912  | S5_4199522  | 6    | 0    | S6_2496170   | S6_6237148   | 12.8 | 32.8    | -2.5 | 2.4   | -2.3 | 3.2  |
| SW    | 5    | 25   | S5_4692912  | S5_4199522  | 7    | 5    | S7_18419460  | S7_6037045   | 15.3 | 36.9    | -2.7 | 2.4   | -2.8 | 3.5  |
| SW    | 5    | 15   | S5_4692912  | S5_4199522  | 8    | 40   | S8_11776408  | S8_11838449  | 15.6 | 37.5    | -2.6 | 2.7   | -1.9 | 3.5  |
| SW    | 5    | 25   | S5_4692912  | S5_4199522  | 11   | 50   | S11_3238944  | S11_3724414  | 16.4 | 38.7    | -2.4 | 2.8   | -3.2 | 1.6  |
| SW    | 5    | 0    | S5_5120324  | S5_4692888  | 5    | 15   | S5_4692912   | S5_4199522   | 15.2 | 36.2    | -2.0 | 2.9   | -4.0 | 3.4  |
| SW    | 5    | 5    | S5_5120324  | S5_4692888  | 9    | 50   | S9_7755937   | S9_7756050   | 16.4 | 32.9    | -2.6 | 2.4   | -2.1 | 3.2  |
| DFE   | 6    | 50   | S6_14335778 | S6_15449552 | 10   | 95   | S10_21365631 | S10_16278049 | 5.5  | 17.3    | 6.4  | 4.5   | 7.1  | 14.3 |
| DFE   | 6    | 90   | S6_22082423 | S6_22394558 | 11   | 215  | S11_10013681 | S11_32879360 | 5.4  | 27.1    | -9.4 | 6.6   | 0.2  | 9.8  |
| DFE   | 6    | 10   | S6_6237148  | S6_14282225 | 6    | 20   | S6_6237148   | S6_14282225  | 5.0  | 34.7    | -4.3 | -18.7 | 6.2  | -8.9 |
| GH    | 6    | 0    | S6_2496170  | S6_6237148  | 7    | 5    | S7_18419460  | S7_6037045   | 5.7  | 11.6    | -0.2 | 0.1   | -0.1 | 0.4  |
| GH    | 6    | 5    | S6_2496170  | S6_6237148  | 10   | 135  | S10_17099642 | S10_6765628  | 7.9  | 18.9    | 0.1  | 0.1   | -0.5 | -0.5 |
| GH    | 6    | 15   | S6_6237148  | S6_14282225 | 11   | 90   | S11_39309852 | S11_28894118 | 6.2  | 16.3    | 0.0  | 0.1   | -0.6 | -0.5 |
| GH    | 6    | 30   | S6_6237148  | S6_14282225 | 6    | 45   | S6_14336019  | S6_14388845  | 5.3  | 19.1    | 0.0  | 0.7   | -0.1 | 0.0  |
| GH    | 6    | 25   | S6_6237148  | S6_14282225 | 9    | 20   | S9_1280000   | S9_7212583   | 5.4  | 21.0    | 0.2  | -0.2  | -0.2 | 0.1  |
| SW    | 6    | 60   | S6_15449552 | S6_18295388 | 10   | 205  | S10_7783201  | S10_5097784  | 13.1 | 33.0    | -2.5 | 2.2   | -2.7 | 3.2  |
| SW    | 6    | 60   | S6_15449552 | S6_18295388 | 6    | 65   | S6_18295384  | S6_18322776  | 13.3 | 33.9    | -2.0 | 2.6   | -2.4 | 2.7  |
| SW    | 6    | 60   | S6_15449552 | S6_18295388 | 11   | 110  | S11_27472029 | S11_20186519 | 14.3 | 34.0    | 2.2  | 1.7   | 3.2  | 3.4  |
| SW    | 6    | 0    | S6_2496170  | S6_6237148  | 9    | 20   | S9_1280000   | S9_7212583   | 13.0 | 31.5    | -2.5 | -2.5  | 2.0  | 2.6  |



| Trait | Chr1 | Pos1 | LM1         | RM1         | Chr2 | Pos2 | LM2          | RM2          | LOD  | PVE (%) | [aa]  | [ad]  | [da]  | [dd]  |
|-------|------|------|-------------|-------------|------|------|--------------|--------------|------|---------|-------|-------|-------|-------|
| SW    | 6    | 5    | S6_2496170  | S6_6237148  | 7    | 5    | S7_18419460  | S7_6037045   | 6.6  | 34.2    | -2.7  | 2.6   | -2.3  | 3.0   |
| SW    | 6    | 15   | S6_6237148  | S6_14282225 | 8    | 35   | S8_11776408  | S8_11838449  | 9.6  | 35.3    | -0.1  | -0.2  | 4.6   | -5.0  |
| SY    | 6    | 15   | S6_6237148  | S6_14282225 | 10   | 105  | S10_16278049 | S10_8438690  | 6.3  | 25.4    | 20.8  | 3.2   | 2.9   | 28.4  |
| GH    | 7    | 85   | S7_14683829 | S7_9034247  | 8    | 60   | S8_11838449  | S8_11838448  | 5.3  | 17.7    | 0.0   | -0.1  | 0.4   | -0.5  |
| GH    | 7    | 5    | S7_18419460 | S7_6037045  | 11   | 90   | S11_39309852 | S11_28894118 | 7.3  | 15.9    | -0.2  | -0.3  | 0.2   | 0.4   |
| GH    | 7    | 5    | S7_18419460 | S7_6037045  | 10   | 135  | S10_17099642 | S10_6765628  | 9.5  | 17.9    | -0.3  | -0.3  | 0.3   | 0.2   |
| GH    | 7    | 70   | S7_6897487  | S7_14683829 | 7    | 80   | S7_14683829  | S7_9034247   | 5.7  | 18.4    | -0.2  | 0.3   | -0.3  | -0.5  |
| SW    | 7    | 50   | S7_12804834 | S7_6897487  | 8    | 40   | S8_11776408  | S8_11838449  | 14.1 | 37.2    | 0.4   | 0.0   | 4.9   | -5.8  |
| SW    | 7    | 5    | S7_18419460 | S7_6037045  | 10   | 135  | S10_17099642 | S10_6765628  | 14.6 | 32.6    | -2.7  | -2.8  | 2.2   | 2.6   |
| SW    | 7    | 5    | S7_18419460 | S7_6037045  | 11   | 110  | S11_27472029 | S11_20186519 | 14.6 | 33.1    | -2.8  | -2.8  | 2.9   | 2.4   |
| SW    | 7    | 0    | S7_18419460 | S7_6037045  | 7    | 10   | S7_6037077   | S7_18542722  | 13.0 | 34.3    | -2.7  | -2.1  | 1.2   | 3.2   |
| SW    | 7    | 5    | S7_18419460 | S7_6037045  | 9    | 20   | S9_1280000   | S9_7212583   | 14.2 | 35.1    | -2.5  | -2.1  | 2.6   | 3.3   |
| SY    | 7    | 5    | S7_18419460 | S7_6037045  | 10   | 205  | S10_7783201  | S10_5097784  | 6.5  | 31.5    | -17.3 | -32.0 | 32.4  | -17.4 |
| DFF   | 8    | 15   | S8_4714912  | S8_11776420 | 10   | 55   | S10_18083837 | S10_17801329 | 5.2  | 21.9    | -0.8  | -2.3  | 15.6  | -17.1 |
| DFF   | 8    | 15   | S8_4714912  | S8_11776420 | 8    | 20   | S8_11776420  | S8_11776408  | 5.9  | 28.6    | -1.0  | 21.4  | -22.9 | -15.9 |
| GH    | 8    | 65   | S8_11838449 | S8_11838448 | 11   | 90   | S11_39309852 | S11_28894118 | 10.2 | 19.3    | -0.2  | -0.2  | 0.3   | 0.5   |
| GH    | 8    | 60   | S8_11838449 | S8_11838448 | 10   | 135  | S10_17099642 | S10_6765628  | 10.3 | 20.3    | 0.0   | -0.1  | -0.6  | -0.5  |
| GH    | 8    | 15   | S8_4714912  | S8_11776420 | 8    | 25   | S8_11776420  | S8_11776408  | 5.4  | 22.2    | 0.0   | -0.2  | 0.3   | -0.8  |
| SW    | 8    | 25   | S8_11776420 | S8_11776408 | 8    | 35   | S8_11776408  | S8_11838449  | 13.9 | 38.0    | -2.0  | -3.3  | 2.7   | 0.8   |
| SW    | 8    | 50   | S8_11838449 | S8_11838448 | 10   | 25   | S10_14148444 | S10_12011468 | 11.4 | 32.2    | 0.3   | -0.1  | -4.8  | -4.6  |
| SW    | 8    | 5    | S8_4714912  | S8_11776420 | 11   | 5    | S11_2882386  | S11_27612418 | 13.6 | 35.3    | 2.4   | -2.8  | -2.7  | 1.4   |
| SW    | 8    | 10   | S8_4714912  | S8_11776420 | 9    | 15   | S9_1280000   | S9_7212583   | 13.7 | 39.7    | -2.0  | -2.7  | 2.8   | 2.5   |
| DFF   | 9    | 45   | S9_7212583  | S9_7755937  | 10   | 100  | S10_21365631 | S10_16278049 | 5.8  | 18.8    | -3.4  | -9.1  | 5.7   | 18.0  |
| DFF   | 9    | 75   | S9_10177047 | S9_10172092 | 11   | 55   | S11_33954110 | S11_42065843 | 6.6  | 23.9    | 5.9   | -4.9  | -15.0 | 4.8   |
| GH    | 9    | 35   | S9_7212583  | S9_7755937  | 10   | 135  | S10_17099642 | S10_6765628  | 8.3  | 21.2    | -0.2  | -0.4  | 0.4   | 0.1   |
| GH    | 9    | 20   | S9_1280000  | S9_7212583  | 11   | 90   | S11_39309852 | S11_28894118 | 9.2  | 20.5    | -0.3  | -0.1  | 0.3   | 0.7   |
| GH    | 9    | 20   | S9_1280000  | S9_7212583  | 9    | 40   | S9_7212583   | S9_7755937   | 7.3  | 27.1    | 0.1   | -0.2  | 0.3   | -0.6  |
| SPC   | 9    | 35   | S9_7212583  | S9_7755937  | 10   | 170  | S10_19001995 | S10_7783201  | 5.2  | 56.6    | 0.0   | 0.5   | 0.2   | 5.1   |

| Trait                     | Chr1 | Pos1 | LM1          | RM1          | Chr2 | Pos2 | LM2          | RM2          | LOD  | PVE (%) | [aa]  | [ad]  | [da] | [dd]  |
|---------------------------|------|------|--------------|--------------|------|------|--------------|--------------|------|---------|-------|-------|------|-------|
| SW                        | 9    | 20   | S9_1280000   | S9_7212583   | 10   | 165  | S10_19001995 | S10_7783201  | 13.7 | 41.4    | -2.4  | 3.1   | -1.8 | 3.9   |
| SW                        | 9    | 55   | S9_7756050   | S9_9689983   | 9    | 65   | S9_9689983   | S9_10003418  | 14.4 | 31.7    | -2.8  | -2.1  | 1.8  | 2.8   |
| SW                        | 9    | 55   | S9_7756050   | S9_9689983   | 11   | 170  | S11_47251892 | S11_7007425  | 15.3 | 35.6    | -2.6  | 2.5   | -2.1 | 3.8   |
| SY                        | 9    | 15   | S9_1280000   | S9_7212583   | 10   | 150  | S10_19001995 | S10_7783201  | 5.3  | 30.1    | 9.6   | 2.3   | 40.4 | 3.1   |
| DFE                       | 10   | 55   | S10_18083837 | S10_17801329 | 10   | 70   | S10_17702463 | S10_21497805 | 6.4  | 26.3    | -9.6  | -7.3  | 5.0  | 15.7  |
| DFE                       | 10   | 55   | S10_18083837 | S10_17801329 | 11   | 25   | S11_27612418 | S11_32832892 | 8.9  | 29.2    | 2.0   | 17.3  | 6.6  | -15.6 |
| GH                        | 10   | 140  | S10_19001995 | S10_7783201  | 10   | 150  | S10_19001995 | S10_7783201  | 12.7 | 36.6    | -0.1  | -0.5  | -0.5 | -0.6  |
| GH                        | 10   | 135  | S10_17099642 | S10_6765628  | 11   | 150  | S11_22893601 | S11_10881649 | 10.2 | 18.9    | 0.0   | 0.5   | 0.1  | 0.6   |
| SPC                       | 10   | 155  | S10_19001995 | S10_7783201  | 11   | 5    | S11_2882386  | S11_27612418 | 7.5  | 66.4    | 0.3   | 1.1   | -2.5 | 2.7   |
| SPC                       | 10   | 160  | S10_19001995 | S10_7783201  | 10   | 195  | S10_7783201  | S10_5097784  | 6.1  | 69.8    | 0.8   | 1.7   | -0.1 | -0.6  |
| SW                        | 10   | 40   | S10_21497771 | S10_13762076 | 11   | 50   | S11_3238944  | S11_3724414  | 15.4 | 33.7    | -2.3  | 2.6   | -2.8 | 3.1   |
| SW                        | 10   | 10   | S10_8791174  | S10_14148444 | 10   | 15   | S10_8791174  | S10_14148444 | 14.8 | 32.8    | -2.7  | -2.8  | 2.4  | 2.4   |
| SY                        | 10   | 95   | S10_21365631 | S10_16278049 | 11   | 65   | S11_30337861 | S11_12765240 | 6.7  | 24.2    | -7.7  | -16.2 | 28.8 | -6.2  |
| DFE                       | 11   | 55   | S11_33954110 | S11_42065843 | 11   | 215  | S11_10013681 | S11_32879360 | 5.7  | 29.1    | 11.8  | -6.8  | -2.0 | 12.2  |
| GH                        | 11   | 90   | S11_39309852 | S11_28894118 | 11   | 105  | S11_28846566 | S11_25427809 | 9.5  | 18.4    | -0.3  | 0.3   | -0.2 | 0.5   |
| SPC                       | 11   | 20   | S11_27612418 | S11_32832892 | 11   | 215  | S11_10013681 | S11_32879360 | 7.1  | 59.8    | 0.4   | -1.5  | -0.6 | 3.1   |
| SW                        | 11   | 40   | S11_177204   | S11_250057   | 11   | 55   | S11_33954110 | S11_42065843 | 15.6 | 32.0    | -2.6  | -2.9  | 2.5  | 2.5   |
| SY                        | 11   | 165  | S11_41096347 | S11_44938548 | 11   | 215  | S11_10013681 | S11_32879360 | 6.2  | 34.0    | -14.9 | 7.7   | 36.1 | -13.6 |
| Pop3 (HPL 24 × ICP 11605) |      |      |              |              |      |      |              |              |      |         |       |       |      |       |
| DFE                       | 1    | 120  | S1_4961612   | S1_679068    | 6    | 15   | S6_20778715  | S6_21140545  | 5.4  | 10.9    | -3.0  | 2.5   | 10.2 | 7.9   |
| DFE                       | 1    | 105  | S1_12001647  | S1_14036679  | 7    | 85   | S7_15005750  | S7_18208587  | 5.5  | 8.8     | 2.7   | -6.0  | -1.5 | -11.7 |
| DFE                       | 1    | 100  | S1_12001584  | S1_12001647  | 8    | 100  | S8_18579673  | S8_15137210  | 5.0  | 6.9     | 2.5   | -1.2  | -9.0 | 5.8   |
| GH                        | 1    | 20   | S1_887236    | S1_3399209   | 2    | 80   | S2_28723848  | S2_6405369   | 6.5  | 15.7    | 0.1   | -0.1  | -0.5 | -0.4  |
| GH                        | 1    | 115  | S1_14036679  | S1_4961612   | 1    | 125  | S1_679069    | S1_5445088   | 5.4  | 17.5    | -0.2  | 0.1   | -0.3 | 0.3   |
| GH                        | 1    | 120  | S1_4961612   | S1_679068    | 3    | 20   | S3_21244595  | S3_22913898  | 17.1 | 67.1    | 0.0   | 0.1   | 0.4  | -0.3  |
| GH                        | 1    | 125  | S1_679069    | S1_5445088   | 4    | 5    | S4_3592410   | S4_2761907   | 15.0 | 31.0    | 0.1   | 0.5   | -0.2 | -0.7  |
| GH                        | 1    | 50   | S1_11314978  | S1_9401795   | 6    | 95   | S6_6094182   | S6_3447497   | 9.3  | 18.8    | 0.4   | 0.2   | 0.0  | 0.6   |
| GH                        | 1    | 115  | S1_14036679  | S1_4961612   | 8    | 85   | S8_10333523  | S8_18579673  | 7.6  | 18.2    | -0.3  | 0.3   | -0.2 | -0.1  |

| Trait | Chr1 | Pos1 | LM1         | RM1         | Chr2 | Pos2 | LM2          | RM2          | LOD  | PVE(%) | [aa]  | [ad] | [da]  | [dd] |
|-------|------|------|-------------|-------------|------|------|--------------|--------------|------|--------|-------|------|-------|------|
| GH    | 1    | 50   | S1_11314978 | S1_9401795  | 9    | 20   | S9_10003418  | S9_8998000   | 6.9  | 14.0   | 0.3   | 0.4  | 0.1   | 0.6  |
| GH    | 1    | 100  | S1_12001584 | S1_12001647 | 10   | 10   | S10_6745618  | S10_18754549 | 6.5  | 14.1   | 0.0   | 0.0  | 0.5   | -0.4 |
| GH    | 1    | 95   | S1_4066143  | S1_12001584 | 11   | 50   | S11_10798039 | S11_27887408 | 5.2  | 17.8   | 0.0   | -0.1 | 0.5   | -0.3 |
| SPC   | 1    | 20   | S1_887236   | S1_3399209  | 3    | 235  | S3_11414215  | S3_19102565  | 5.5  | 19.3   | 0.1   | 0.9  | -1.4  | -2.3 |
| SW    | 1    | 20   | S1_887236   | S1_3399209  | 2    | 75   | S2_23068242  | S2_36264850  | 9.0  | 24.6   | -0.9  | -0.5 | 2.6   | 2.7  |
| SW    | 1    | 25   | S1_1798766  | S1_1575466  | 1    | 35   | S1_11361258  | S1_3361403   | 6.5  | 20.1   | -0.5  | 0.3  | 1.9   | 2.7  |
| SW    | 1    | 35   | S1_11361258 | S1_3361403  | 3    | 160  | S3_23347149  | S3_5324878   | 7.6  | 20.0   | -1.6  | -1.0 | -1.4  | -1.5 |
| SW    | 1    | 110  | S1_12001647 | S1_14036679 | 4    | 70   | S4_839628    | S4_1521545   | 6.1  | 16.5   | 1.3   | 1.9  | -1.4  | -2.0 |
| SW    | 1    | 120  | S1_4961612  | S1_679068   | 6    | 100  | S6_6094182   | S6_3447497   | 6.1  | 21.3   | -1.0  | 0.6  | 1.7   | -2.4 |
| SW    | 1    | 35   | S1_11361258 | S1_3361403  | 7    | 80   | S7_15005750  | S7_18208587  | 5.4  | 18.8   | 1.4   | -1.1 | 1.1   | -0.9 |
| SW    | 1    | 35   | S1_11361258 | S1_3361403  | 8    | 55   | S8_7083582   | S8_6798921   | 6.7  | 19.0   | -1.3  | -1.2 | -1.3  | -0.8 |
| SW    | 1    | 35   | S1_11361258 | S1_3361403  | 9    | 25   | S9_7756050   | S9_8995134   | 8.1  | 21.3   | 1.2   | -1.2 | 1.3   | -2.1 |
| SW    | 1    | 95   | S1_4066143  | S1_12001584 | 10   | 20   | S10_6745618  | S10_18754549 | 7.4  | 15.1   | 1.7   | -1.5 | 1.3   | -1.1 |
| SW    | 1    | 75   | S1_7127752  | S1_8856852  | 11   | 165  | S11_48519738 | S11_22689710 | 7.3  | 24.9   | -0.8  | 1.0  | 2.2   | -2.2 |
| SY    | 1    | 155  | S1_17365797 | S1_16757180 | 2    | 225  | S2_9110747   | S2_20521571  | 5.6  | 23.6   | 20.1  | 8.1  | 0.9   | 15.9 |
| SY    | 1    | 85   | S1_381039   | S1_9111014  | 6    | 40   | S6_14282200  | S6_14335733  | 5.8  | 18.7   | 8.4   | 15.8 | 13.5  | 31.5 |
| SY    | 1    | 155  | S1_17365797 | S1_16757180 | 7    | 80   | S7_15005750  | S7_18208587  | 5.1  | 14.1   | -10.6 | 6.8  | -14.1 | 17.3 |
| SY    | 1    | 95   | S1_4066143  | S1_12001584 | 8    | 110  | S8_14218715  | S8_15841326  | 7.8  | 26.0   | 3.7   | -7.0 | -2.5  | 38.6 |
| SY    | 1    | 155  | S1_17365797 | S1_16757180 | 10   | 10   | S10_6745618  | S10_18754549 | 6.3  | 20.6   | 15.9  | 7.1  | 21.5  | 28.9 |
| SY    | 1    | 155  | S1_17365797 | S1_16757180 | 11   | 110  | S11_26654248 | S11_39257707 | 5.7  | 18.9   | 12.5  | 14.1 | 17.2  | -1.9 |
| DFF   | 2    | 120  | S2_24924004 | S2_11759659 | 3    | 180  | S3_18695411  | S3_22966656  | 5.7  | 6.3    | -4.6  | 1.8  | -3.2  | 16.4 |
| DFF   | 2    | 170  | S2_6037490  | S2_14842741 | 5    | 15   | S5_4108250   | S5_4692888   | 5.4  | 13.7   | -9.0  | -9.5 | 0.0   | 3.2  |
| DFF   | 2    | 110  | S2_36167974 | S2_33146528 | 10   | 10   | S10_6745618  | S10_18754549 | 6.1  | 14.6   | -0.9  | 4.3  | -13.0 | 17.2 |
| GH    | 2    | 55   | S2_7373516  | S2_26876108 | 2    | 60   | S2_26876108  | S2_36085710  | 6.8  | 17.4   | -0.1  | -0.4 | 0.1   | -0.4 |
| GH    | 2    | 185  | S2_3012518  | S2_36010450 | 3    | 20   | S3_21244595  | S3_22913898  | 16.2 | 67.1   | 0.2   | 0.3  | 0.2   | -0.5 |
| GH    | 2    | 155  | S2_34522392 | S2_6500923  | 4    | 5    | S4_3592410   | S4_2761907   | 11.8 | 25.8   | 0.0   | 0.1  | 0.0   | 0.9  |
| GH    | 2    | 80   | S2_28723848 | S2_6405369  | 5    | 70   | S5_4199522   | S5_624899    | 5.7  | 16.7   | 0.2   | 0.3  | 0.1   | 0.2  |
| GH    | 2    | 35   | S2_5077845  | S2_26647031 | 6    | 95   | S6_6094182   | S6_3447497   | 5.5  | 20.1   | -0.2  | -0.1 | 0.6   | -0.3 |

| Trait | Chr1 | Pos1 | LM1         | RM1         | Chr2 | Pos2 | LM2          | RM2          | LOD  | PVE (%) | [aa] | [ad] | [da]  | [dd]  |
|-------|------|------|-------------|-------------|------|------|--------------|--------------|------|---------|------|------|-------|-------|
| GH    | 2    | 170  | S2_6037490  | S2_14842741 | 7    | 30   | S7_1393902   | S7_2664466   | 5.1  | 16.2    | 0.1  | -0.4 | 0.0   | -0.5  |
| GH    | 2    | 80   | S2_28723848 | S2_6405369  | 8    | 50   | S8_7083582   | S8_6798921   | 7.8  | 19.0    | -0.1 | -0.3 | 0.1   | -0.7  |
| GH    | 2    | 225  | S2_9110747  | S2_20521571 | 9    | 70   | S9_1280107   | S9_1272426   | 5.5  | 16.5    | 0.2  | -0.3 | -0.2  | 0.2   |
| GH    | 2    | 55   | S2_7373516  | S2_26876108 | 10   | 40   | S10_9867010  | S10_18754605 | 13.7 | 27.4    | 0.0  | -0.1 | 0.6   | -0.2  |
| GH    | 2    | 185  | S2_3012518  | S2_36010450 | 11   | 120  | S11_32081128 | S11_16965469 | 7.3  | 21.1    | -0.6 | 0.0  | 0.0   | 0.2   |
| SW    | 2    | 60   | S2_26876108 | S2_36085710 | 2    | 115  | S2_33146528  | S2_31710312  | 9.7  | 22.0    | 1.4  | 1.4  | -1.2  | -0.1  |
| SW    | 2    | 185  | S2_3012518  | S2_36010450 | 3    | 35   | S3_17628375  | S3_17145449  | 9.9  | 37.1    | 1.7  | 0.0  | -3.2  | -0.6  |
| SW    | 2    | 75   | S2_23068242 | S2_36264850 | 4    | 5    | S4_3592410   | S4_2761907   | 9.5  | 28.4    | 1.7  | -2.6 | 0.7   | -3.7  |
| SW    | 2    | 75   | S2_23068242 | S2_36264850 | 5    | 10   | S5_4108250   | S5_4692888   | 7.8  | 21.8    | -0.9 | 3.3  | -1.0  | 2.6   |
| SW    | 2    | 115  | S2_33146528 | S2_31710312 | 6    | 55   | S6_14316872  | S6_12750333  | 7.6  | 20.3    | 1.2  | -1.9 | 1.1   | -1.5  |
| SW    | 2    | 105  | S2_14274387 | S2_20017568 | 7    | 45   | S7_2664466   | S7_2709523   | 6.5  | 22.4    | -0.5 | -2.0 | -1.4  | -2.0  |
| SW    | 2    | 105  | S2_14274387 | S2_20017568 | 8    | 35   | S8_5590896   | S8_7083582   | 8.5  | 25.2    | -1.3 | 0.2  | -1.1  | -1.6  |
| SW    | 2    | 105  | S2_14274387 | S2_20017568 | 9    | 10   | S9_10221364  | S9_10172092  | 9.5  | 24.2    | 1.3  | -1.6 | 0.7   | -0.4  |
| SW    | 2    | 180  | S2_20785495 | S2_3012518  | 10   | 60   | S10_4935601  | S10_22177883 | 8.0  | 18.3    | 1.7  | 1.9  | -1.3  | 0.0   |
| SW    | 2    | 115  | S2_33146528 | S2_31710312 | 11   | 130  | S11_27400742 | S11_39685563 | 8.6  | 20.3    | 1.5  | -1.3 | 1.2   | -0.7  |
| SY    | 2    | 70   | S2_27324056 | S2_17356325 | 2    | 175  | S2_36429055  | S2_29055889  | 6.0  | 22.1    | 0.6  | 3.0  | -30.2 | -37.7 |
| SY    | 2    | 175  | S2_36429055 | S2_29055889 | 3    | 45   | S3_18154848  | S3_17193829  | 6.2  | 23.6    | 19.1 | -3.1 | 14.0  | 12.5  |
| SY    | 2    | 175  | S2_36429055 | S2_29055889 | 6    | 45   | S6_14202383  | S6_14380087  | 6.4  | 17.5    | 13.6 | 18.1 | 16.5  | 12.9  |
| SY    | 2    | 245  | S2_11771536 | S2_206842   | 7    | 80   | S7_15005750  | S7_18208587  | 8.0  | 21.8    | 15.5 | 2.8  | -3.6  | 27.2  |
| SY    | 2    | 230  | S2_20521571 | S2_15866804 | 10   | 20   | S10_6745618  | S10_18754549 | 7.3  | 21.0    | 7.3  | 18.1 | 16.7  | 30.8  |
| SY    | 2    | 10   | S2_17095395 | S2_16997696 | 11   | 55   | S11_8456028  | S11_24859368 | 5.5  | 25.8    | 19.4 | -8.8 | -14.2 | 41.5  |
| DFF   | 3    | 110  | S3_9468971  | S3_8772530  | 3    | 200  | S3_1763820   | S3_3640530   | 5.4  | 10.5    | 3.2  | -8.7 | 8.9   | 2.3   |
| DFF   | 3    | 155  | S3_24585116 | S3_6422296  | 11   | 35   | S11_13558980 | S11_24859357 | 6.2  | 8.7     | 2.6  | 1.1  | 10.8  | -9.6  |
| GH    | 3    | 20   | S3_21244595 | S3_22913898 | 3    | 40   | S3_17145449  | S3_18154873  | 41.8 | 96.0    | 0.0  | 0.5  | 0.5   | 0.0   |
| GH    | 3    | 20   | S3_21244595 | S3_22913898 | 4    | 5    | S4_3592410   | S4_2761907   | 30.7 | 69.0    | 0.0  | 0.4  | 0.0   | -0.4  |
| GH    | 3    | 20   | S3_21244595 | S3_22913898 | 5    | 30   | S5_4692912   | S5_1202286   | 8.9  | 61.5    | 0.2  | -0.2 | -0.2  | 0.1   |
| GH    | 3    | 20   | S3_21244595 | S3_22913898 | 6    | 95   | S6_6094182   | S6_3447497   | 19.0 | 65.9    | -0.1 | -0.4 | 0.8   | -0.4  |
| GH    | 3    | 20   | S3_21244595 | S3_22913898 | 7    | 45   | S7_2664466   | S7_2709523   | 11.4 | 65.1    | 0.0  | 0.4  | 0.1   | -0.4  |

| Trait | Chr1 | Pos1 | LM1         | RM1         | Chr2 | Pos2 | LM2          | RM2          | LOD  | PVE (%) | [aa]  | [ad]  | [da]  | [dd]  |
|-------|------|------|-------------|-------------|------|------|--------------|--------------|------|---------|-------|-------|-------|-------|
| GH    | 3    | 20   | S3_21244595 | S3_22913898 | 8    | 20   | S8_648217    | S8_5590896   | 17.4 | 66.4    | 0.0   | 0.4   | 0.1   | -0.3  |
| GH    | 3    | 20   | S3_21244595 | S3_22913898 | 9    | 50   | S9_5329954   | S9_1280000   | 14.9 | 66.2    | 0.0   | 0.8   | -0.1  | 0.0   |
| GH    | 3    | 20   | S3_21244595 | S3_22913898 | 10   | 10   | S10_6745618  | S10_18754549 | 15.6 | 65.8    | 0.2   | -0.2  | 0.6   | -0.6  |
| GH    | 3    | 20   | S3_21244595 | S3_22913898 | 11   | 50   | S11_10798039 | S11_27887408 | 17.5 | 65.6    | -0.2  | -0.2  | 0.6   | -0.2  |
| SPC   | 3    | 190  | S3_23950418 | S3_23900756 | 11   | 30   | S11_34926164 | S11_14777000 | 5.3  | 21.2    | -0.9  | 1.2   | 0.7   | 1.4   |
| SW    | 3    | 25   | S3_25402258 | S3_18933167 | 3    | 160  | S3_23347149  | S3_5324878   | 7.1  | 21.6    | -1.3  | -0.5  | -2.2  | -1.2  |
| SW    | 3    | 160  | S3_23347149 | S3_5324878  | 4    | 60   | S4_5232181   | S4_839628    | 8.8  | 23.7    | -1.1  | -0.1  | -2.1  | -1.5  |
| SW    | 3    | 160  | S3_23347149 | S3_5324878  | 5    | 10   | S5_4108250   | S5_4692888   | 6.4  | 18.4    | -0.2  | 3.1   | 0.0   | 2.2   |
| SW    | 3    | 160  | S3_23347149 | S3_5324878  | 6    | 90   | S6_6094182   | S6_3447497   | 6.9  | 21.4    | 1.5   | -1.9  | 0.9   | -0.6  |
| SW    | 3    | 160  | S3_23347149 | S3_5324878  | 7    | 55   | S7_14683829  | S7_19171518  | 6.3  | 18.3    | 1.0   | -1.5  | 0.9   | 1.0   |
| SW    | 3    | 90   | S3_24127310 | S3_24126743 | 8    | 120  | S8_14899494  | S8_15315643  | 5.4  | 15.7    | 0.3   | 2.5   | -0.3  | 3.4   |
| SW    | 3    | 235  | S3_11414215 | S3_19102565 | 9    | 5    | S9_10221364  | S9_10172092  | 9.4  | 26.3    | 1.3   | -1.8  | 1.0   | -0.3  |
| SW    | 3    | 35   | S3_17628375 | S3_17145449 | 10   | 15   | S10_6745618  | S10_18754549 | 8.7  | 24.8    | 1.9   | -1.6  | 0.7   | -0.3  |
| SW    | 3    | 160  | S3_23347149 | S3_5324878  | 11   | 165  | S11_48519738 | S11_22689710 | 7.2  | 22.5    | 1.3   | -2.1  | 1.5   | -0.7  |
| SY    | 3    | 65   | S3_1296061  | S3_16632579 | 6    | 25   | S6_18663394  | S6_14282225  | 5.7  | 17.3    | -12.0 | -12.0 | 19.3  | 6.6   |
| SY    | 3    | 105  | S3_24127268 | S3_3362024  | 7    | 10   | S7_6043293   | S7_1393902   | 5.2  | 15.4    | -18.1 | 10.2  | -12.4 | 16.9  |
| SY    | 3    | 200  | S3_1763820  | S3_3640530  | 10   | 10   | S10_6745618  | S10_18754549 | 6.1  | 31.7    | 28.7  | 1.1   | -6.5  | 16.0  |
| SY    | 3    | 165  | S3_7903058  | S3_16519959 | 11   | 75   | S11_26490677 | S11_24186931 | 5.8  | 24.5    | 4.5   | -6.8  | -34.7 | -16.0 |
| GH    | 4    | 5    | S4_3592410  | S4_2761907  | 4    | 85   | S4_2222481   | S4_2761945   | 7.9  | 19.5    | 0.0   | -0.1  | -0.4  | -0.4  |
| GH    | 4    | 5    | S4_3592410  | S4_2761907  | 5    | 75   | S5_4199522   | S5_624899    | 10.1 | 24.4    | 0.1   | 0.0   | -0.4  | -0.4  |
| GH    | 4    | 0    | S4_3592410  | S4_2761907  | 6    | 90   | S6_6094182   | S6_3447497   | 7.6  | 17.9    | 0.0   | 0.0   | 0.4   | -0.5  |
| GH    | 4    | 5    | S4_3592410  | S4_2761907  | 7    | 60   | S7_19171518  | S7_10467966  | 7.6  | 24.5    | -0.1  | 0.1   | 0.4   | -0.4  |
| GH    | 4    | 5    | S4_3592410  | S4_2761907  | 8    | 50   | S8_7083582   | S8_6798921   | 13.8 | 28.6    | -0.1  | 0.1   | 0.1   | 0.8   |
| GH    | 4    | 5    | S4_3592410  | S4_2761907  | 10   | 40   | S10_9867010  | S10_18754605 | 15.5 | 32.7    | 0.0   | 0.1   | 0.2   | -0.7  |
| GH    | 4    | 5    | S4_3592410  | S4_2761907  | 11   | 165  | S11_48519738 | S11_22689710 | 9.2  | 26.4    | 0.0   | 0.0   | -0.1  | 0.8   |
| SW    | 4    | 15   | S4_3592410  | S4_2761907  | 4    | 55   | S4_5573457   | S4_5232181   | 7.1  | 21.3    | -0.9  | -0.7  | 3.0   | 2.9   |
| SW    | 4    | 45   | S4_5991509  | S4_5573457  | 6    | 100  | S6_6094182   | S6_3447497   | 5.1  | 16.3    | 1.9   | -1.9  | 1.0   | -1.4  |
| SW    | 4    | 90   | S4_2222481  | S4_2761945  | 8    | 0    | S8_879539    | S8_388862    | 5.2  | 20.3    | -0.9  | 1.3   | -0.3  | -2.4  |

| Trait | Chr1 | Pos1 | LM1         | RM1         | Chr2 | Pos2 | LM2          | RM2          | LOD | PVE (%) | [aa]  | [ad]  | [da]  | [dd]  |
|-------|------|------|-------------|-------------|------|------|--------------|--------------|-----|---------|-------|-------|-------|-------|
| SW    | 4    | 55   | S4_5573457  | S4_5232181  | 10   | 75   | S10_12011472 | S10_17897318 | 8.8 | 18.8    | -1.2  | -1.0  | -1.0  | -0.6  |
| SW    | 4    | 55   | S4_5573457  | S4_5232181  | 11   | 200  | S11_3246235  | S11_3725161  | 6.1 | 14.6    | 0.2   | 1.4   | -0.1  | 0.9   |
| SY    | 4    | 30   | S4_9442019  | S4_7998411  | 4    | 85   | S4_2222481   | S4_2761945   | 5.1 | 21.6    | -7.2  | -21.8 | 7.7   | 14.2  |
| SY    | 4    | 30   | S4_9442019  | S4_7998411  | 10   | 10   | S10_6745618  | S10_18754549 | 6.9 | 22.6    | -15.5 | -7.7  | 14.4  | 11.0  |
| GH    | 5    | 35   | S5_4692912  | S5_1202286  | 5    | 70   | S5_4199522   | S5_624899    | 8.9 | 24.2    | 0.1   | 0.2   | -0.6  | -0.4  |
| GH    | 5    | 70   | S5_4199522  | S5_624899   | 11   | 170  | S11_22689710 | S11_4453854  | 6.3 | 18.9    | 0.0   | -0.4  | 0.0   | -0.2  |
| SW    | 5    | 50   | S5_1202286  | S5_514608   | 6    | 100  | S6_6094182   | S6_3447497   | 5.2 | 17.0    | 1.1   | -1.3  | 0.7   | -0.8  |
| SW    | 5    | 5    | S5_3437906  | S5_4108250  | 10   | 60   | S10_4935601  | S10_22177883 | 5.9 | 16.7    | 1.5   | 2.1   | -0.9  | -1.3  |
| SW    | 5    | 0    | S5_3437907  | S5_3437906  | 11   | 45   | S11_11249294 | S11_25591691 | 5.5 | 14.6    | 1.3   | 1.4   | -1.7  | -1.5  |
| SY    | 5    | 75   | S5_4199522  | S5_624899   | 10   | 10   | S10_6745618  | S10_18754549 | 7.4 | 23.3    | -1.7  | -1.8  | -28.6 | -23.8 |
| DFE   | 6    | 90   | S6_6094182  | S6_3447497  | 7    | 85   | S7_15005750  | S7_18208587  | 5.4 | 10.7    | -6.3  | 9.0   | 6.1   | -13.1 |
| GH    | 6    | 95   | S6_6094182  | S6_3447497  | 7    | 15   | S7_6043293   | S7_1393902   | 7.9 | 14.6    | 0.1   | 0.5   | 0.0   | -0.3  |
| GH    | 6    | 20   | S6_21140545 | S6_18663445 | 10   | 45   | S10_9867010  | S10_18754605 | 6.3 | 17.3    | 0.1   | 0.0   | -0.6  | -0.5  |
| GH    | 6    | 95   | S6_6094182  | S6_3447497  | 11   | 20   | S11_29782754 | S11_40540329 | 7.0 | 20.6    | 0.2   | 0.6   | 0.1   | -0.1  |
| SW    | 6    | 35   | S6_14335833 | S6_14385396 | 6    | 45   | S6_14202383  | S6_14380087  | 8.2 | 17.3    | 1.5   | 3.0   | -1.7  | -0.2  |
| SW    | 6    | 100  | S6_6094182  | S6_3447497  | 7    | 60   | S7_19171518  | S7_10467966  | 5.9 | 23.1    | -0.8  | -2.4  | 0.6   | 2.6   |
| SW    | 6    | 95   | S6_6094182  | S6_3447497  | 8    | 15   | S8_648217    | S8_5590896   | 6.7 | 39.8    | 1.1   | 2.0   | -1.5  | -2.3  |
| SW    | 6    | 95   | S6_6094182  | S6_3447497  | 9    | 10   | S9_10221364  | S9_10172092  | 5.0 | 17.7    | -0.8  | 1.3   | 1.0   | -1.5  |
| SW    | 6    | 95   | S6_6094182  | S6_3447497  | 10   | 10   | S10_6745618  | S10_18754549 | 7.6 | 26.8    | -1.8  | 1.6   | 1.4   | -0.1  |
| SW    | 6    | 95   | S6_6094182  | S6_3447497  | 11   | 45   | S11_11249294 | S11_25591691 | 6.6 | 19.3    | 1.3   | 0.8   | -1.1  | -0.3  |
| SY    | 6    | 20   | S6_21140545 | S6_18663445 | 7    | 10   | S7_6043293   | S7_1393902   | 7.2 | 19.8    | -15.5 | 16.2  | -24.1 | -0.3  |
| SY    | 6    | 100  | S6_6094182  | S6_3447497  | 10   | 10   | S10_6745618  | S10_18754549 | 5.4 | 18.4    | -6.8  | -8.7  | 29.5  | 25.6  |
| SY    | 6    | 40   | S6_14282200 | S6_14335733 | 11   | 75   | S11_26490677 | S11_24186931 | 6.4 | 14.7    | 14.1  | 18.2  | 16.2  | 8.5   |
| DFE   | 7    | 85   | S7_15005750 | S7_18208587 | 9    | 5    | S9_10221364  | S9_10172092  | 5.7 | 10.5    | 4.9   | 6.3   | -5.2  | -15.1 |
| GH    | 7    | 30   | S7_1393902  | S7_2664466  | 7    | 35   | S7_1393902   | S7_2664466   | 8.1 | 21.0    | 0.1   | -0.3  | 0.2   | -0.9  |
| GH    | 7    | 65   | S7_19171518 | S7_10467966 | 8    | 95   | S8_18579673  | S8_15137210  | 5.7 | 18.4    | 0.3   | -0.1  | -0.1  | 0.3   |
| GH    | 7    | 30   | S7_1393902  | S7_2664466  | 10   | 10   | S10_6745618  | S10_18754549 | 6.7 | 20.5    | -0.1  | -0.1  | 0.3   | -0.4  |
| SW    | 7    | 65   | S7_19171518 | S7_10467966 | 7    | 70   | S7_10467966  | S7_15005750  | 6.3 | 30.2    | -0.8  | 0.9   | -3.8  | 1.1   |

| Trait                        | Chr1 | Pos1 | LM1          | RM1          | Chr2 | Pos2 | LM2          | RM2          | LOD  | PVE (%) | [aa]  | [ad]  | [da]  | [dd]  |
|------------------------------|------|------|--------------|--------------|------|------|--------------|--------------|------|---------|-------|-------|-------|-------|
| SW                           | 7    | 5    | S7_6043293   | S7_1393902   | 10   | 60   | S10_4935601  | S10_22177883 | 6.1  | 17.6    | -1.1  | -2.2  | -1.3  | -1.2  |
| SY                           | 7    | 75   | S7_10467966  | S7_15005750  | 10   | 20   | S10_6745618  | S10_18754549 | 7.2  | 17.7    | -16.5 | -3.4  | 12.5  | 14.9  |
| SY                           | 7    | 10   | S7_6043293   | S7_1393902   | 11   | 195  | S11_3724414  | S11_366844   | 8.5  | 24.1    | -1.0  | 35.6  | 8.6   | -28.8 |
| GH                           | 8    | 55   | S8_7083582   | S8_6798921   | 8    | 60   | S8_6798921   | S8_19450430  | 11.7 | 24.7    | -0.4  | 0.0   | -0.6  | 0.2   |
| GH                           | 8    | 50   | S8_7083582   | S8_6798921   | 10   | 45   | S10_9867010  | S10_18754605 | 7.5  | 22.8    | 0.1   | 0.1   | -0.5  | -0.6  |
| SW                           | 8    | 50   | S8_7083582   | S8_6798921   | 10   | 10   | S10_6745618  | S10_18754549 | 7.9  | 26.4    | 1.1   | -0.9  | 2.4   | -1.8  |
| SW                           | 8    | 15   | S8_648217    | S8_5590896   | 11   | 50   | S11_10798039 | S11_27887408 | 6.0  | 35.4    | 0.9   | -1.7  | 1.5   | -1.7  |
| SY                           | 8    | 20   | S8_648217    | S8_5590896   | 10   | 10   | S10_6745618  | S10_18754549 | 5.1  | 26.9    | 6.9   | 15.4  | 14.9  | 32.1  |
| SY                           | 8    | 60   | S8_6798921   | S8_19450430  | 11   | 55   | S11_8456028  | S11_24859368 | 5.0  | 20.7    | -25.7 | 7.9   | -10.2 | 39.4  |
| GH                           | 9    | 55   | S9_5329954   | S9_1280000   | 9    | 70   | S9_1280107   | S9_1272426   | 11.8 | 25.6    | 0.1   | -0.4  | 0.6   | -0.2  |
| GH                           | 9    | 70   | S9_1280107   | S9_1272426   | 10   | 40   | S10_9867010  | S10_18754605 | 11.3 | 26.1    | 0.0   | 0.3   | 0.3   | -0.2  |
| SW                           | 9    | 25   | S9_7756050   | S9_8995134   | 9    | 35   | S9_7755937   | S9_7993111   | 6.8  | 16.3    | 0.1   | -2.4  | 0.0   | 2.5   |
| SW                           | 9    | 25   | S9_7756050   | S9_8995134   | 10   | 120  | S10_17800762 | S10_20225996 | 8.9  | 19.0    | 1.0   | 1.2   | -1.0  | -2.0  |
| SW                           | 9    | 45   | S9_5329954   | S9_1280000   | 11   | 60   | S11_2583306  | S11_36601967 | 7.1  | 19.4    | 1.0   | 1.2   | -0.7  | -1.7  |
| SY                           | 9    | 20   | S9_10003418  | S9_8998000   | 10   | 5    | S10_6745618  | S10_18754549 | 7.3  | 22.7    | -5.9  | 0.9   | -30.8 | -16.4 |
| GH                           | 10   | 35   | S10_9867010  | S10_18754605 | 10   | 40   | S10_9867010  | S10_18754605 | 13.6 | 27.3    | 0.1   | 0.1   | 0.2   | -0.6  |
| GH                           | 10   | 10   | S10_6745618  | S10_18754549 | 11   | 65   | S11_25591551 | S11_36998432 | 11.7 | 23.0    | 0.2   | 0.2   | 0.0   | -0.5  |
| SW                           | 10   | 15   | S10_6745618  | S10_18754549 | 10   | 75   | S10_12011472 | S10_17897318 | 8.9  | 23.3    | 1.5   | 0.4   | -1.4  | -0.8  |
| SW                           | 10   | 75   | S10_12011472 | S10_17897318 | 11   | 165  | S11_48519738 | S11_22689710 | 8.7  | 19.5    | 1.4   | -1.2  | 1.4   | -1.2  |
| SY                           | 10   | 15   | S10_6745618  | S10_18754549 | 10   | 45   | S10_9867010  | S10_18754605 | 6.7  | 33.1    | -23.0 | 8.8   | 3.0   | 22.4  |
| SY                           | 10   | 10   | S10_6745618  | S10_18754549 | 11   | 180  | S11_9114357  | S11_2019429  | 7.7  | 27.1    | 7.3   | -18.8 | 2.5   | -38.0 |
| GH                           | 11   | 165  | S11_48519738 | S11_22689710 | 11   | 170  | S11_22689710 | S11_4453854  | 7.1  | 16.0    | -0.2  | -0.1  | 0.3   | 0.3   |
| SW                           | 11   | 60   | S11_2583306  | S11_36601967 | 11   | 125  | S11_7565026  | S11_20087622 | 7.1  | 19.4    | -0.6  | -1.3  | -1.6  | -1.1  |
| SY                           | 11   | 55   | S11_8456028  | S11_24859368 | 11   | 160  | S11_29845620 | S11_23864521 | 5.4  | 20.0    | 16.3  | -7.2  | 0.3   | 19.7  |
| Pop4 (ICP 8863 × ICPL 87119) |      |      |              |              |      |      |              |              |      |         |       |       |       |       |
| DFP                          | 1    | 25   | S1_1285564   | S1_16743053  | 1    | 120  | S1_1954810   | S1_12641799  | 5.4  | 16.2    | 3.9   | -7.7  | 3.6   | -0.3  |
| DFP                          | 1    | 75   | S1_1158266   | S1_12641760  | 3    | 145  | S3_4949379   | S3_15768334  | 5.3  | 19.2    | 1.8   | -1.0  | -7.4  | 5.5   |
| SPC                          | 1    | 0    | S1_3518364   | S1_8912598   | 10   | 165  | S10_11797822 | S10_22177616 | 5.3  | 9.8     | 0.5   | -0.5  | 0.8   | 0.5   |

| Trait | Chr1 | Pos1 | LM1         | RM1         | Chr2 | Pos2 | LM2          | RM2          | LOD | PVE (%) | [aa]  | [ad]  | [da]  | [dd]  |
|-------|------|------|-------------|-------------|------|------|--------------|--------------|-----|---------|-------|-------|-------|-------|
| SW    | 1    | 105  | S1_2823169  | S1_11795390 | 3    | 105  | S3_27536189  | S3_13210310  | 5.3 | 21.9    | 0.6   | -0.4  | -0.2  | -1.5  |
| SW    | 1    | 110  | S1_9402663  | S1_11824695 | 4    | 55   | S4_3978352   | S4_3978307   | 5.1 | 23.8    | -0.2  | -1.1  | -0.8  | 0.3   |
| SW    | 1    | 110  | S1_9402663  | S1_11824695 | 8    | 50   | S8_1870690   | S8_14893200  | 5.1 | 20.9    | 0.0   | -1.2  | 0.4   | -0.4  |
| SW    | 1    | 45   | S1_11236615 | S1_9402646  | 11   | 190  | S11_10379800 | S11_39387203 | 5.2 | 19.6    | 0.1   | 0.3   | -0.8  | -1.1  |
| SY    | 1    | 5    | S1_3518364  | S1_8912598  | 11   | 200  | S11_10379800 | S11_39387203 | 6.3 | 23.8    | 1.8   | -20.4 | 16.8  | -63.8 |
| SY    | 1    | 45   | S1_11236615 | S1_9402646  | 2    | 20   | S2_5465513   | S2_27251002  | 5.3 | 17.8    | -1.0  | 13.5  | 16.0  | -44.4 |
| SY    | 1    | 15   | S1_15951980 | S1_15951983 | 7    | 45   | S7_11292795  | S7_15538705  | 5.3 | 12.4    | -20.9 | -24.9 | 23.1  | -7.1  |
| SY    | 1    | 15   | S1_15951980 | S1_15951983 | 8    | 10   | S8_4870225   | S8_17923633  | 5.2 | 12.0    | -13.9 | -19.3 | 38.5  | 10.4  |
| DFF   | 2    | 105  | S2_20786266 | S2_3909322  | 3    | 95   | S3_1820861   | S3_18837767  | 5.9 | 15.5    | 2.9   | 0.8   | 11.2  | 5.1   |
| DFF   | 2    | 170  | S2_31369072 | S2_2636840  | 6    | 100  | S6_11368993  | S6_16630543  | 5.6 | 19.8    | 0.3   | 5.0   | -8.1  | 9.0   |
| DFF   | 2    | 0    | S2_19392681 | S2_31090530 | 7    | 170  | S7_7547477   | S7_2556783   | 5.7 | 19.1    | 0.5   | 6.1   | 3.9   | 4.6   |
| SPC   | 2    | 5    | S2_31090530 | S2_11172947 | 6    | 120  | S6_8998640   | S6_22745176  | 5.3 | 17.0    | 0.1   | 0.4   | -1.2  | 0.7   |
| SW    | 2    | 40   | S2_10335056 | S2_2989918  | 11   | 175  | S11_41966756 | S11_2739522  | 6.2 | 24.4    | 0.2   | 0.1   | -1.4  | -0.7  |
| SW    | 2    | 10   | S2_11172947 | S2_11585386 | 4    | 100  | S4_3982439   | S4_10981441  | 5.1 | 25.4    | 0.4   | 0.5   | -0.9  | 1.0   |
| SW    | 2    | 45   | S2_2989945  | S2_28067338 | 6    | 95   | S6_21912913  | S6_11368997  | 5.6 | 21.0    | -0.1  | 0.2   | 0.7   | -1.8  |
| SW    | 2    | 125  | S2_12561939 | S2_16904395 | 8    | 90   | S8_4088164   | S8_11725020  | 5.6 | 25.0    | -0.1  | -0.3  | -1.1  | 1.0   |
| SY    | 2    | 20   | S2_5465513  | S2_27251002 | 6    | 75   | S6_12492736  | S6_19839881  | 5.1 | 14.1    | 3.8   | 11.6  | -6.9  | -48.9 |
| SY    | 2    | 105  | S2_20786266 | S2_3909322  | 8    | 100  | S8_12763827  | S8_2545645   | 6.1 | 19.6    | 3.8   | 4.0   | -25.2 | -55.6 |
| DFF   | 3    | 110  | S3_517899   | S3_5034170  | 4    | 60   | S4_3978352   | S4_3978307   | 6.2 | 16.7    | 5.3   | 7.1   | -2.0  | 6.2   |
| DFF   | 3    | 0    | S3_17585835 | S3_6422190  | 5    | 75   | S5_1033048   | S5_2154363   | 5.2 | 14.7    | 0.6   | 9.8   | -5.7  | -3.9  |
| DFF   | 3    | 95   | S3_1820861  | S3_18837767 | 10   | 80   | S10_14607250 | S10_15235469 | 5.7 | 16.2    | -2.3  | 7.2   | -6.1  | 0.2   |
| SW    | 3    | 130  | S3_3207601  | S3_28801734 | 7    | 40   | S7_5257435   | S7_19515938  | 5.5 | 23.7    | -0.5  | 0.0   | -0.2  | -1.7  |
| SW    | 4    | 55   | S4_3978352  | S4_3978307  | 4    | 95   | S4_3982439   | S4_10981441  | 5.5 | 25.6    | -0.1  | 0.7   | -1.0  | 1.7   |
| SW    | 4    | 45   | S4_3978352  | S4_3978307  | 7    | 145  | S7_4934324   | S7_16759426  | 7.0 | 14.2    | 0.3   | -0.8  | 0.8   | 0.1   |
| SW    | 4    | 50   | S4_3978352  | S4_3978307  | 10   | 55   | S10_7592635  | S10_16594094 | 5.2 | 17.5    | 0.1   | -0.8  | 0.1   | -1.2  |
| SW    | 4    | 30   | S4_3978304  | S4_11052197 | 11   | 195  | S11_10379800 | S11_39387203 | 5.6 | 19.5    | -0.5  | -0.6  | -0.6  | -0.3  |
| SY    | 4    | 60   | S4_3978352  | S4_3978307  | 7    | 50   | S7_17391305  | S7_629308    | 5.2 | 15.1    | -6.9  | -19.4 | -39.9 | -53.8 |
| SW    | 5    | 55   | S5_4439127  | S5_1033048  | 6    | 165  | S6_19397317  | S6_22274548  | 5.2 | 14.6    | -0.4  | -0.9  | 0.0   | 0.1   |



| Trait                       | Chr1 | Pos1 | LM1          | RM1          | Chr2 | Pos2 | LM2          | RM2          | LOD | PVE (%) | [aa]  | [ad]  | [da]  | [dd]  |
|-----------------------------|------|------|--------------|--------------|------|------|--------------|--------------|-----|---------|-------|-------|-------|-------|
| SY                          | 5    | 5    | S5_2134834   | S5_2133997   | 8    | 100  | S8_12763827  | S8_2545645   | 7.2 | 21.1    | -5.2  | 8.6   | -47.6 | -29.4 |
| DFF                         | 6    | 100  | S6_11368993  | S6_16630543  | 6    | 135  | S6_18650949  | S6_10118855  | 5.1 | 23.1    | 0.8   | -4.7  | 6.6   | 11.6  |
| DFF                         | 6    | 100  | S6_11368993  | S6_16630543  | 7    | 165  | S7_7547426   | S7_7547477   | 5.4 | 12.0    | -3.6  | 1.1   | 6.5   | 3.3   |
| DFF                         | 6    | 185  | S6_9119076   | S6_1641600   | 11   | 155  | S11_26961748 | S11_11799678 | 5.5 | 19.5    | -6.6  | 4.4   | 2.8   | 5.7   |
| SPC                         | 6    | 95   | S6_21912913  | S6_11368997  | 7    | 40   | S7_5257435   | S7_19515938  | 6.3 | 30.5    | 0.0   | 1.2   | -0.2  | 1.5   |
| SPC                         | 6    | 120  | S6_8998640   | S6_22745176  | 8    | 75   | S8_4817492   | S8_18097152  | 5.5 | 18.6    | 0.3   | -0.8  | -0.2  | 1.5   |
| SPC                         | 6    | 145  | S6_4528744   | S6_11344426  | 10   | 25   | S10_8682310  | S10_22432012 | 5.0 | 19.1    | 0.4   | -0.7  | -0.7  | 0.7   |
| SW                          | 6    | 95   | S6_21912913  | S6_11368997  | 7    | 40   | S7_5257435   | S7_19515938  | 6.1 | 18.6    | 0.4   | 0.6   | -0.8  | -1.1  |
| SW                          | 6    | 10   | S6_5168768   | S6_21993984  | 6    | 95   | S6_21912913  | S6_11368997  | 5.3 | 22.1    | 0.1   | -0.1  | 0.8   | -1.8  |
| SW                          | 6    | 95   | S6_21912913  | S6_11368997  | 10   | 150  | S10_11797843 | S10_17661180 | 5.3 | 21.7    | 0.1   | 1.1   | -0.1  | -1.4  |
| SW                          | 6    | 95   | S6_21912913  | S6_11368997  | 11   | 190  | S11_10379800 | S11_39387203 | 5.1 | 19.6    | 0.1   | -0.5  | 0.6   | 1.2   |
| SW                          | 7    | 40   | S7_5257435   | S7_19515938  | 8    | 5    | S8_4870225   | S8_17923633  | 5.5 | 25.3    | 0.0   | 1.1   | 0.2   | 1.4   |
| SY                          | 8    | 100  | S8_12763827  | S8_2545645   | 8    | 140  | S8_19001637  | S8_19307650  | 5.4 | 16.4    | 0.5   | -31.6 | 18.2  | -28.0 |
| SY                          | 8    | 100  | S8_12763827  | S8_2545645   | 10   | 125  | S10_21275558 | S10_8446246  | 6.1 | 16.0    | 1.1   | -38.8 | 13.8  | -55.8 |
| SY                          | 8    | 115  | S8_12196669  | S8_8905244   | 11   | 200  | S11_10379800 | S11_39387203 | 5.5 | 23.1    | 1.3   | -1.5  | 21.3  | -68.0 |
| SPC                         | 10   | 130  | S10_12572056 | S10_11360684 | 11   | 175  | S11_41966756 | S11_2739522  | 5.2 | 21.4    | -0.3  | 0.6   | -1.2  | 1.7   |
| SPC                         | 10   | 115  | S10_16591318 | S10_19313155 | 10   | 165  | S10_11797822 | S10_22177616 | 5.5 | 12.8    | -0.1  | 0.0   | 1.1   | 0.7   |
| SY                          | 10   | 140  | S10_11129172 | S10_22177741 | 11   | 35   | S11_29910199 | S11_1427973  | 6.1 | 14.3    | -26.5 | -16.0 | 4.6   | 30.7  |
| DFF                         | 11   | 30   | S11_6866243  | S11_22800082 | 11   | 185  | S11_27825781 | S11_27703059 | 5.1 | 30.1    | -0.6  | -4.0  | 2.3   | 14.1  |
| SPC                         | 11   | 10   | S11_9655513  | S11_11782549 | 11   | 25   | S11_39259070 | S11_5870873  | 5.2 | 28.9    | -0.3  | 0.2   | 0.7   | 2.4   |
| SW                          | 11   | 175  | S11_41966756 | S11_2739522  | 11   | 190  | S11_10379800 | S11_39387203 | 5.7 | 24.8    | 0.6   | 0.9   | -0.5  | 1.0   |
| Pop5 (ICP 5529 × ICP 11605) |      |      |              |              |      |      |              |              |     |         |       |       |       |       |
| GH                          | 1    | 80   | S1_17462230  | s1_16873606  | 5    | 45   | S5_4199096   | S5_3228176   | 5.1 | 10.6    | 0.2   | 0.3   | 0.3   | 0.1   |
| SW                          | 1    | 90   | S1_16910575  | S1_17478283  | 2    | 15   | S2_4089442   | S2_36164833  | 5.1 | 13.6    | 1.0   | -1.4  | 1.2   | -0.9  |
| SW                          | 1    | 90   | S1_16910575  | S1_17478283  | 7    | 175  | S7_14683829  | S7_14588865  | 5.2 | 14.6    | 1.1   | -1.6  | 0.9   | -1.2  |
| SW                          | 1    | 90   | S1_16910575  | S1_17478283  | 11   | 95   | S11_42473528 | S11_40289708 | 6.9 | 13.5    | -1.3  | -1.2  | -1.3  | -0.9  |
| SW                          | 1    | 95   | S1_17486758  | S1_17365797  | 3    | 125  | S3_5052534   | S3_8600411   | 5.5 | 14.7    | 1.0   | -1.5  | 1.4   | -1.4  |
| SW                          | 1    | 35   | s1_4415753   | S1_4839845   | 1    | 90   | S1_16910575  | S1_17478283  | 6.2 | 11.5    | 0.0   | 1.1   | -0.6  | -0.5  |

| Trait | Chr1 | Pos1 | LM1         | RM1         | Chr2 | Pos2 | LM2          | RM2          | LOD  | PVE (%) | [aa]  | [ad]  | [da]  | [dd]  |
|-------|------|------|-------------|-------------|------|------|--------------|--------------|------|---------|-------|-------|-------|-------|
| SY    | 1    | 50   | S1_1575466  | S1_12652912 | 3    | 85   | S3_23698867  | S3_8011694   | 5.5  | 17.4    | 22.1  | -18.8 | -21.4 | 41.8  |
| SY    | 1    | 80   | S1_17462230 | s1_16873606 | 2    | 5    | S2_6500923   | S2_36141669  | 5.6  | 22.9    | 2.5   | -38.8 | 5.3   | -35.3 |
| SY    | 1    | 75   | S1_3905217  | S1_17462230 | 5    | 85   | S5_2154598   | S5_3299149   | 7.2  | 32.7    | -33.8 | 2.8   | 1.3   | 57.2  |
| SY    | 1    | 75   | S1_3905217  | S1_17462230 | 8    | 160  | S8_17090863  | S8_5491195   | 7.2  | 33.3    | 4.4   | -44.5 | -12.6 | -46.8 |
| SY    | 1    | 75   | S1_3905217  | S1_17462230 | 9    | 30   | S9_7304246   | S9_5330124   | 5.6  | 27.2    | -0.2  | -29.3 | 0.6   | -55.8 |
| SY    | 1    | 75   | S1_3905217  | S1_17462230 | 11   | 150  | S11_772476   | S11_17940886 | 5.9  | 31.5    | 23.6  | 15.4  | 30.5  | -20.0 |
| SY    | 1    | 55   | S1_435014   | S1_14036692 | 1    | 60   | S1_435014    | S1_14036692  | 6.8  | 29.6    | -11.8 | -24.6 | 71.9  | -18.8 |
| SY    | 1    | 20   | S1_5944791  | S1_5173345  | 6    | 55   | S6_6094182   | S6_3312026   | 6.7  | 40.0    | -10.5 | -11.0 | 45.6  | -34.4 |
| DFF   | 2    | 10   | S2_16974864 | S2_6623704  | 7    | 175  | S7_14683829  | S7_14588865  | 5.1  | 21.2    | -3.3  | -3.4  | 8.7   | 1.8   |
| GH    | 2    | 140  | S2_13395941 | S2_13388912 | 4    | 50   | S4_5573457   | S4_7149747   | 5.4  | 16.6    | 0.1   | 0.5   | 0.1   | -0.3  |
| GH    | 2    | 130  | s2_16726731 | S2_16216536 | 2    | 165  | S2_36104004  | S2_7680557   | 5.5  | 26.7    | 0.1   | 0.3   | 0.3   | -0.6  |
| GH    | 2    | 170  | S2_36104004 | S2_7680557  | 3    | 65   | S3_14618126  | S3_22872410  | 6.7  | 22.6    | 0.2   | -0.1  | -0.5  | -0.3  |
| GH    | 2    | 160  | S2_36104004 | S2_7680557  | 6    | 95   | S6_14282225  | S6_14311546  | 5.7  | 13.1    | -0.2  | 0.6   | 0.0   | -0.3  |
| GH    | 2    | 160  | S2_36104004 | S2_7680557  | 8    | 70   | S8_16623818  | S8_8700231   | 5.2  | 22.3    | -0.2  | 0.6   | -0.2  | -0.2  |
| GH    | 2    | 50   | S2_9110747  | S2_12221357 | 5    | 40   | S5_2081547   | S5_4199096   | 5.9  | 14.9    | -0.1  | 0.1   | -0.4  | -0.7  |
| GH    | 2    | 50   | S2_9110747  | S2_12221357 | 7    | 110  | S7_6037064   | S7_2639387   | 8.9  | 22.0    | -0.2  | -0.1  | 0.3   | 0.2   |
| GH    | 2    | 50   | S2_9110747  | S2_12221357 | 11   | 70   | S11_43548291 | S11_32240905 | 6.9  | 21.7    | 0.3   | -0.1  | 0.0   | 0.4   |
| SW    | 2    | 10   | S2_16974864 | S2_6623704  | 11   | 25   | S11_6210775  | S11_39507811 | 5.3  | 24.4    | 0.3   | -1.2  | 1.0   | -1.3  |
| SY    | 2    | 10   | S2_16974864 | S2_6623704  | 3    | 115  | S3_14754306  | S3_8040710   | 5.3  | 19.0    | 0.7   | 31.2  | -19.7 | -46.9 |
| SY    | 2    | 10   | S2_16974864 | S2_6623704  | 7    | 175  | S7_14683829  | S7_14588865  | 5.7  | 27.9    | 17.8  | -47.8 | -14.1 | 56.9  |
| SY    | 2    | 25   | S2_30868559 | S2_3713697  | 6    | 70   | S6_14548839  | S6_12512558  | 7.0  | 28.3    | -1.0  | 13.9  | 46.7  | -68.2 |
| SY    | 2    | 40   | S2_31385744 | s2_1201138_ | 11   | 160  | S11_38144723 | S11_27887800 | 6.6  | 25.7    | 3.2   | -0.9  | -60.1 | 40.4  |
| SY    | 2    | 5    | S2_6500923  | S2_36141669 | 8    | 105  | S8_9267520   | S8_9779781   | 6.9  | 31.4    | -2.5  | -9.8  | 66.5  | -41.5 |
| DFF   | 3    | 80   | S3_8195933  | S3_3563061  | 11   | 70   | S11_43548291 | S11_32240905 | 5.5  | 23.6    | -4.4  | -4.5  | -3.7  | 12.3  |
| GH    | 3    | 35   | s3_20698771 | S3_18430894 | 3    | 65   | S3_14618126  | S3_22872410  | 16.6 | 74.8    | -0.1  | -0.1  | -0.6  | -0.6  |
| GH    | 3    | 35   | s3_20698771 | S3_18430894 | 4    | 25   | S4_1710877   | s4_496463    | 15.3 | 73.8    | 0.1   | -0.1  | 0.7   | -0.6  |
| GH    | 3    | 35   | s3_20698771 | S3_18430894 | 5    | 135  | S5_4199522   | S5_3988054   | 8.7  | 74.3    | -0.1  | -0.2  | 0.2   | -0.6  |
| GH    | 3    | 35   | s3_20698771 | S3_18430894 | 6    | 65   | S6_16310378  | S6_14551548  | 15.6 | 74.2    | 0.2   | -0.2  | 0.5   | -0.6  |

| Trait | Chr1 | Pos1 | LM1         | RM1         | Chr2 | Pos2 | LM2          | RM2          | LOD  | PVE (%) | [aa]  | [ad]  | [da]  | [dd]  |
|-------|------|------|-------------|-------------|------|------|--------------|--------------|------|---------|-------|-------|-------|-------|
| GH    | 3    | 35   | s3_20698771 | S3_18430894 | 8    | 90   | S8_7083922   | S8_8700211   | 12.5 | 74.1    | 0.4   | -0.4  | 0.0   | 0.1   |
| GH    | 3    | 35   | s3_20698771 | S3_18430894 | 9    | 65   | S9_1280107   | S9_7212593   | 5.8  | 69.4    | -0.1  | -0.1  | 0.0   | -0.3  |
| GH    | 3    | 35   | s3_20698771 | S3_18430894 | 11   | 165  | S11_35533615 | S11_24152330 | 10.2 | 73.0    | 0.2   | -0.2  | 0.5   | -0.6  |
| GH    | 3    | 25   | S3_22234078 | S3_16681929 | 7    | 20   | S7_19090687  | S7_13036645  | 8.8  | 33.7    | -0.2  | 0.1   | 0.6   | -0.6  |
| GH    | 3    | 90   | S3_8011694  | S3_22090943 | 10   | 45   | S10_5310960  | S10_4472034  | 5.3  | 16.4    | 0.2   | 0.0   | -0.1  | 0.5   |
| SW    | 3    | 20   | S3_24127385 | S3_21274904 | 3    | 100  | S3_10301855  | S3_7318897   | 5.2  | 16.4    | 1.3   | 1.8   | -0.4  | -1.3  |
| SW    | 3    | 20   | S3_24127385 | S3_21274904 | 10   | 60   | S10_4472034  | S10_234727   | 5.6  | 19.6    | 1.1   | 0.3   | -0.5  | 0.5   |
| SW    | 3    | 15   | S3_28538775 | S3_21244595 | 11   | 95   | S11_42473528 | S11_40289708 | 5.8  | 15.8    | 1.0   | 1.7   | -1.2  | -0.3  |
| SY    | 3    | 100  | S3_10301855 | S3_7318897  | 11   | 140  | S11_31114457 | S11_28353104 | 8.7  | 26.8    | -15.8 | -61.7 | 37.2  | -5.3  |
| SY    | 3    | 40   | S3_18430894 | S3_18154848 | 8    | 155  | S8_9779799   | S8_17090863  | 5.4  | 31.8    | -13.3 | 52.3  | -20.5 | -45.5 |
| SY    | 3    | 130  | S3_2106166  | S3_6531705  | 6    | 125  | S6_18245488  | S6_18663445  | 5.6  | 26.1    | 2.3   | -34.0 | 13.6  | -79.5 |
| SY    | 3    | 85   | S3_23698867 | S3_8011694  | 3    | 105  | S3_925660    | S3_8994380   | 6.8  | 22.4    | -31.1 | -26.1 | 27.4  | 35.3  |
| SY    | 3    | 155  | S3_29089318 | S3_517761   | 7    | 115  | S7_16759426  | S7_18208587  | 5.8  | 17.4    | -33.9 | -18.7 | 42.7  | 20.3  |
| DFF   | 4    | 40   | S4_3887219  | S4_3355054  | 11   | 80   | S11_18575052 | S11_38654219 | 7.0  | 22.2    | 4.8   | 4.3   | -2.7  | 10.8  |
| GH    | 4    | 25   | S4_1710877  | s4_496463   | 8    | 5    | S8_18016282  | S8_879539    | 5.6  | 18.2    | 0.0   | 0.5   | 0.0   | -0.4  |
| GH    | 4    | 25   | S4_1710877  | s4_496463   | 11   | 10   | S11_36998432 | S11_26636997 | 5.5  | 17.3    | -0.2  | -0.1  | 0.3   | 0.2   |
| GH    | 4    | 30   | s4_428893   | S4_2900796  | 6    | 65   | S6_16310378  | S6_14551548  | 5.2  | 10.9    | 0.3   | -0.2  | -0.2  | 0.1   |
| SPC   | 4    | 10   | S4_1867372  | S4_2222488  | 5    | 90   | S5_2154598   | S5_3299149   | 6.9  | 15.4    | -0.2  | -0.5  | 1.0   | 0.7   |
| SPC   | 4    | 40   | S4_3887219  | S4_3355054  | 7    | 175  | S7_14683829  | S7_14588865  | 5.2  | 15.0    | 0.2   | -0.2  | 0.4   | -1.7  |
| SW    | 4    | 25   | S4_1710877  | s4_496463   | 7    | 70   | S7_7974084   | S7_2627909   | 5.1  | 19.9    | -0.9  | -0.3  | -0.6  | -2.3  |
| SW    | 4    | 25   | S4_1710877  | s4_496463   | 11   | 120  | S11_2412606  | S11_5977933  | 5.1  | 19.5    | -0.7  | -2.1  | -1.6  | 0.3   |
| SY    | 4    | 5    | S4_2313990  | S4_1867372  | 11   | 165  | S11_35533615 | S11_24152330 | 5.3  | 20.8    | -22.7 | -6.4  | 20.4  | 39.9  |
| SY    | 4    | 30   | s4_428893   | S4_2900796  | 7    | 20   | S7_19090687  | S7_13036645  | 5.1  | 17.4    | 30.5  | 33.6  | 35.3  | 10.2  |
| DFF   | 5    | 120  | S5_703897   | S5_4199522  | 11   | 135  | S11_13945965 | S11_24152343 | 5.4  | 23.1    | -1.3  | -0.4  | 1.2   | -15.9 |
| GH    | 5    | 115  | S5_2827511  | S5_703897   | 11   | 25   | S11_6210775  | S11_39507811 | 8.5  | 25.5    | -0.4  | 0.2   | 0.1   | 0.1   |
| GH    | 5    | 30   | S5_3908353  | S5_2511713  | 6    | 140  | S6_22076489  | S6_15818390  | 7.4  | 19.2    | -0.3  | 0.1   | -0.1  | 0.6   |
| GH    | 5    | 45   | S5_4199096  | S5_3228176  | 5    | 70   | S5_2154719   | S5_3512197   | 6.4  | 18.1    | -0.1  | 0.2   | -0.5  | -0.2  |
| GH    | 5    | 45   | S5_4199096  | S5_3228176  | 10   | 15   | S10_7783201  | S10_7567880  | 5.6  | 11.1    | -0.2  | 0.3   | -0.1  | 0.4   |

| Trait | Chr1 | Pos1 | LM1         | RM1         | Chr2 | Pos2 | LM2          | RM2          | LOD | PVE (%) | [aa]  | [ad]  | [da]  | [dd]  |
|-------|------|------|-------------|-------------|------|------|--------------|--------------|-----|---------|-------|-------|-------|-------|
| GH    | 5    | 130  | S5_4199522  | S5_3988054  | 7    | 100  | S7_10731962  | S7_15294781  | 8.6 | 26.8    | 0.0   | 0.3   | -0.1  | -0.6  |
| GH    | 5    | 130  | S5_4199522  | S5_3988054  | 8    | 10   | S8_18016282  | S8_879539    | 8.4 | 28.0    | 0.0   | 0.4   | 0.1   | -0.6  |
| SPC   | 5    | 105  | S5_3512215  | S5_3512203  | 7    | 65   | S7_19133038  | S7_19133012  | 5.8 | 9.5     | 0.2   | -0.2  | -0.1  | -1.2  |
| SPC   | 5    | 85   | S5_2154598  | S5_3299149  | 11   | 55   | S11_4453854  | S11_4725362  | 5.2 | 21.2    | 0.3   | 0.7   | 0.4   | 1.9   |
| SW    | 5    | 115  | S5_2827511  | S5_703897   | 11   | 95   | S11_42473528 | S11_40289708 | 6.0 | 19.6    | 0.1   | 0.2   | 1.3   | 3.0   |
| SY    | 5    | 105  | S5_3512215  | S5_3512203  | 11   | 160  | S11_38144723 | S11_27887800 | 5.5 | 16.9    | -6.0  | 0.8   | 46.6  | -31.5 |
| SY    | 5    | 65   | S5_2154419  | S5_3511745  | 6    | 70   | S6_14548839  | S6_12512558  | 5.9 | 35.1    | 30.5  | 4.8   | -11.4 | 79.8  |
| SY    | 5    | 65   | S5_2154419  | S5_3511745  | 9    | 25   | S9_7304246   | S9_5330124   | 5.0 | 22.0    | -5.5  | -39.6 | -26.0 | -55.6 |
| SY    | 5    | 75   | S5_2154719  | S5_3512197  | 5    | 95   | S5_3299149   | S5_5120324   | 5.0 | 18.0    | -35.5 | -0.1  | -12.3 | 44.8  |
| SY    | 5    | 125  | S5_4199522  | S5_3988054  | 7    | 170  | S7_14130607  | S7_14683829  | 6.2 | 25.3    | -20.9 | 26.7  | -27.0 | 68.5  |
| DFP   | 6    | 45   | S6_60533    | S6_3186747  | 6    | 110  | S6_18663394  | S6_17420283  | 5.1 | 14.7    | 1.5   | 2.8   | -7.1  | -3.9  |
| GH    | 6    | 80   | S6_12512558 | S6_3630897  | 8    | 10   | S8_18016282  | S8_879539    | 6.8 | 28.5    | -0.1  | 0.7   | -0.2  | -0.2  |
| GH    | 6    | 70   | S6_14548839 | S6_12512558 | 6    | 80   | S6_12512558  | S6_3630897   | 6.8 | 19.3    | -0.4  | 0.1   | 0.0   | 0.5   |
| GH    | 6    | 70   | S6_14548839 | S6_12512558 | 7    | 145  | S7_4126324   | S7_4191819   | 5.9 | 19.9    | 0.1   | 0.4   | 0.1   | -0.1  |
| GH    | 6    | 15   | S6_3630463  | S6_6794468  | 11   | 85   | S11_23930022 | S11_45876012 | 6.4 | 27.6    | 0.0   | -0.6  | 0.3   | -0.7  |
| SW    | 6    | 95   | S6_14282225 | S6_14311546 | 10   | 65   | S10_4472034  | S10_234727   | 5.1 | 21.8    | -0.9  | 1.0   | 0.2   | 0.4   |
| SW    | 6    | 15   | S6_3630463  | S6_6794468  | 11   | 25   | S11_6210775  | S11_39507811 | 7.3 | 30.0    | 1.2   | -1.6  | 0.4   | -1.3  |
| SY    | 6    | 125  | S6_18245488 | S6_18663445 | 8    | 105  | S8_9267520   | S8_9779781   | 6.8 | 32.6    | -3.9  | 7.2   | 56.5  | -80.4 |
| SY    | 6    | 125  | S6_18245488 | S6_18663445 | 10   | 75   | S10_4472034  | S10_234727   | 5.5 | 17.5    | -4.1  | -5.9  | 23.3  | 50.6  |
| SY    | 6    | 120  | S6_18322873 | S6_18322737 | 7    | 25   | S7_360074    | S7_396455    | 5.2 | 12.4    | 16.9  | -27.3 | -13.0 | 13.9  |
| SY    | 6    | 50   | S6_3186747  | S6_6094182  | 11   | 160  | S11_38144723 | S11_27887800 | 8.6 | 32.3    | -9.0  | 1.9   | 45.3  | -76.8 |
| SY    | 6    | 55   | S6_6094182  | S6_3312026  | 6    | 60   | S6_3312026   | S6_16310378  | 5.9 | 33.3    | 7.5   | 36.8  | -4.9  | -73.3 |
| GH    | 7    | 15   | S7_19090687 | S7_13036645 | 9    | 10   | S9_10172092  | S9_7756050   | 5.7 | 13.3    | 0.3   | 0.1   | 0.0   | 0.2   |
| GH    | 7    | 55   | S7_4753261  | S7_16343301 | 8    | 10   | S8_18016282  | S8_879539    | 6.4 | 21.2    | 0.1   | -0.6  | -0.2  | -0.3  |
| GH    | 7    | 75   | S7_566440   | S7_5435193  | 10   | 30   | S10_16425032 | S10_5310960  | 7.3 | 18.8    | -0.1  | 0.3   | 0.1   | 0.6   |
| GH    | 7    | 130  | S7_5677691  | S7_2549635  | 11   | 195  | S11_33160406 | S11_23457576 | 7.1 | 16.7    | -0.3  | 0.0   | 0.0   | 0.4   |
| GH    | 7    | 110  | S7_6037064  | S7_2639387  | 7    | 160  | S7_6897487   | S7_6219852   | 7.2 | 20.7    | -0.3  | 0.1   | 0.0   | 0.4   |
| SW    | 7    | 155  | S7_10971518 | S7_6897487  | 9    | 65   | S9_1280107   | S9_7212593   | 5.6 | 23.0    | -0.8  | 0.6   | 0.6   | -2.5  |

| Trait | Chr1 | Pos1 | LM1          | RM1          | Chr2 | Pos2 | LM2          | RM2          | LOD | PVE (%) | [aa]  | [ad]  | [da]  | [dd]  |
|-------|------|------|--------------|--------------|------|------|--------------|--------------|-----|---------|-------|-------|-------|-------|
| SW    | 7    | 115  | S7_16759426  | S7_18208587  | 11   | 190  | S11_33160406 | S11_23457576 | 6.1 | 23.4    | -1.1  | -1.5  | -1.2  | -0.6  |
| SY    | 7    | 155  | S7_10971518  | S7_6897487   | 8    | 130  | S8_14208514  | s8_14254343  | 6.6 | 23.9    | -22.5 | -38.5 | 43.9  | 34.7  |
| SY    | 7    | 170  | S7_14130607  | S7_14683829  | 9    | 45   | S9_7212583   | S9_1662492   | 7.6 | 15.9    | -12.3 | -26.3 | -13.5 | 35.8  |
| SY    | 7    | 20   | S7_19090687  | S7_13036645  | 11   | 160  | S11_38144723 | S11_27887800 | 7.9 | 25.7    | -39.9 | 12.2  | -12.4 | 62.6  |
| SY    | 7    | 110  | S7_6037064   | S7_2639387   | 7    | 175  | S7_14683829  | S7_14588865  | 6.9 | 31.4    | 6.7   | 22.7  | 55.1  | -51.9 |
| GH    | 8    | 90   | S8_7083922   | S8_8700211   | 10   | 70   | S10_4472034  | S10_234727   | 7.1 | 24.2    | 0.2   | -0.5  | -0.2  | -0.3  |
| GH    | 8    | 85   | S8_7083922   | S8_8700211   | 11   | 80   | S11_18575052 | S11_38654219 | 7.0 | 24.3    | 0.3   | 0.0   | 0.0   | 0.6   |
| GH    | 8    | 60   | S8_8700222   | S8_5616255   | 8    | 85   | S8_7083922   | S8_8700211   | 5.8 | 19.0    | -0.4  | 0.0   | 0.0   | 0.5   |
| SW    | 8    | 5    | S8_18016282  | S8_879539    | 11   | 25   | S11_6210775  | S11_39507811 | 5.9 | 26.8    | 1.1   | -0.8  | 0.8   | 0.0   |
| SY    | 8    | 130  | S8_14208514  | s8_14254343  | 11   | 160  | S11_38144723 | S11_27887800 | 6.8 | 30.2    | 6.6   | -1.9  | -58.8 | 79.1  |
| SY    | 8    | 105  | S8_9267520   | S8_9779781   | 8    | 120  | S8_10333523  | S8_14208514  | 5.5 | 28.6    | -22.6 | -37.6 | 30.2  | 47.9  |
| GH    | 9    | 50   | S9_7212583   | S9_1662492   | 11   | 70   | S11_43548291 | S11_32240905 | 5.6 | 17.7    | 0.3   | -0.1  | 0.0   | 0.2   |
| SW    | 9    | 40   | S9_5330124   | S9_5329954   | 11   | 25   | S11_6210775  | S11_39507811 | 6.1 | 23.0    | -0.2  | 0.2   | -2.0  | 2.1   |
| SY    | 9    | 40   | S9_5330124   | S9_5329954   | 11   | 160  | S11_38144723 | S11_27887800 | 8.1 | 24.5    | 13.2  | 7.5   | 64.5  | -49.5 |
| GH    | 10   | 30   | S10_16425032 | S10_5310960  | 11   | 80   | S11_18575052 | S11_38654219 | 5.7 | 19.3    | 0.3   | -0.1  | -0.1  | 0.4   |
| SW    | 10   | 65   | S10_4472034  | S10_234727   | 11   | 25   | S11_6210775  | S11_39507811 | 5.4 | 29.0    | 1.2   | -1.2  | 0.6   | 0.2   |
| SY    | 10   | 65   | S10_4472034  | S10_234727   | 11   | 160  | S11_38144723 | S11_27887800 | 6.8 | 32.6    | 39.5  | -26.1 | -13.3 | 68.7  |
| GH    | 11   | 10   | S11_36998432 | S11_26636997 | 11   | 80   | S11_18575052 | S11_38654219 | 7.4 | 20.9    | 0.1   | 0.2   | 0.5   | 0.0   |
| SW    | 11   | 50   | S11_42065843 | S11_12498183 | 11   | 95   | S11_42473528 | S11_40289708 | 6.3 | 17.0    | -1.5  | -0.3  | -1.4  | -0.7  |
| SY    | 11   | 25   | S11_6210775  | S11_39507811 | 11   | 135  | S11_13945965 | S11_24152343 | 6.5 | 22.8    | -21.4 | -48.1 | 23.3  | 35.3  |

# Supplementary Figure S1. Genetic and QTL maps for Pop1 (ICP 11605 × ICP 14209).

Markers are shown on right side of the linkage group while map distances are indicated on left side. QTLs for the different traits are indicated by different colored bars with red, purple, blue, black and green showing QTLs for seed protein content, seed weight, seed yield, growth habit and days to first flowering, respectively.

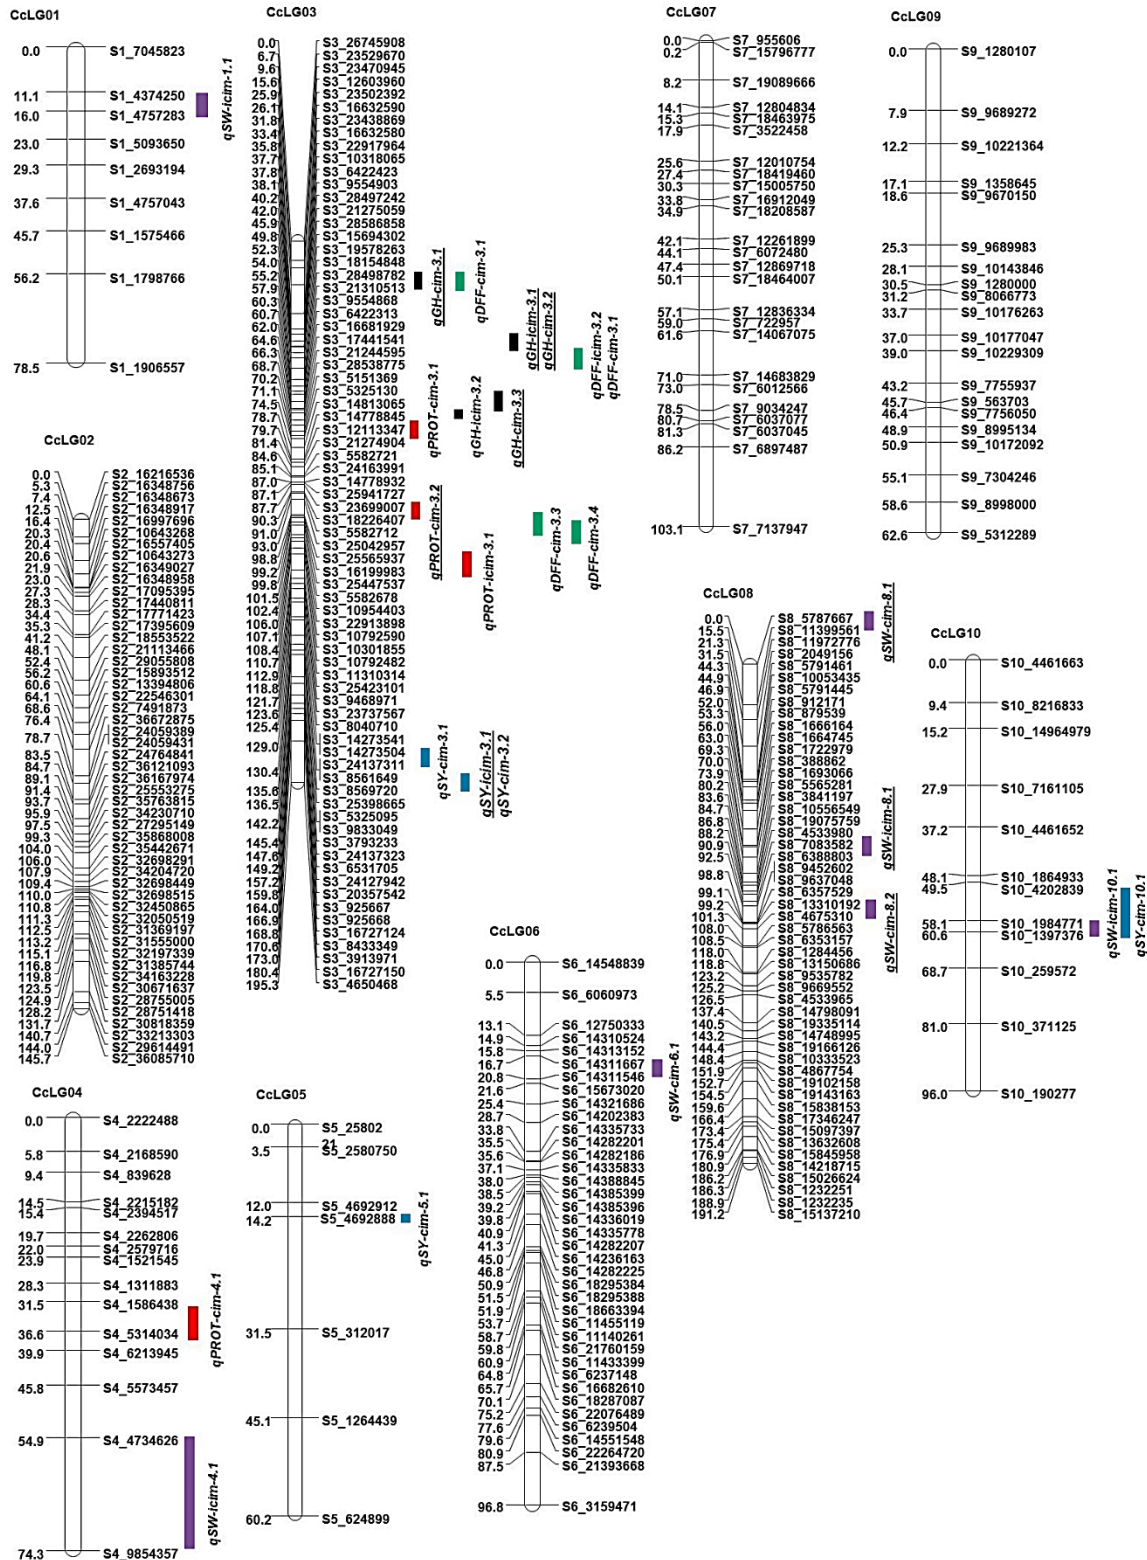

# Supplementary Figure S1 (continued)

CcLG011-a

CcLG11-b

CcLG11-c

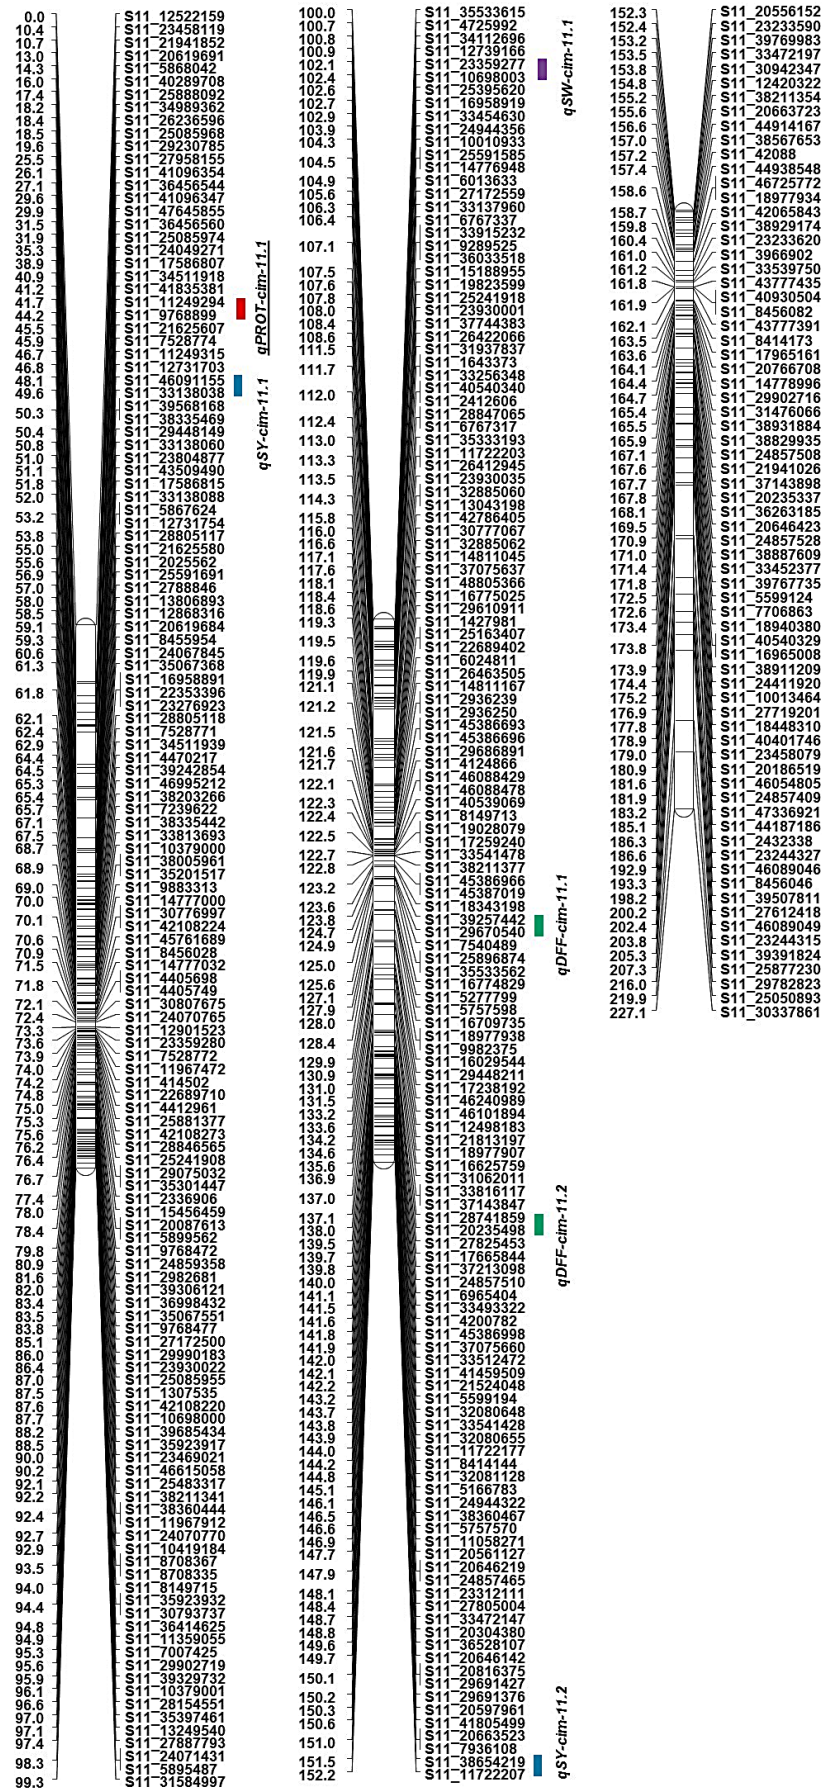

## Supplementary Figure S2. Genetic and QTL maps for Pop2 (ICP 8863 × ICP 11605).

Markers are shown on right side of the linkage group while map distances are indicated on left side. QTLs for the different traits are indicated by different colored bars with red, purple, blue, black and green showing QTLs for seed protein content, seed weight, seed yield, growth habit and days to first flowering, respectively.

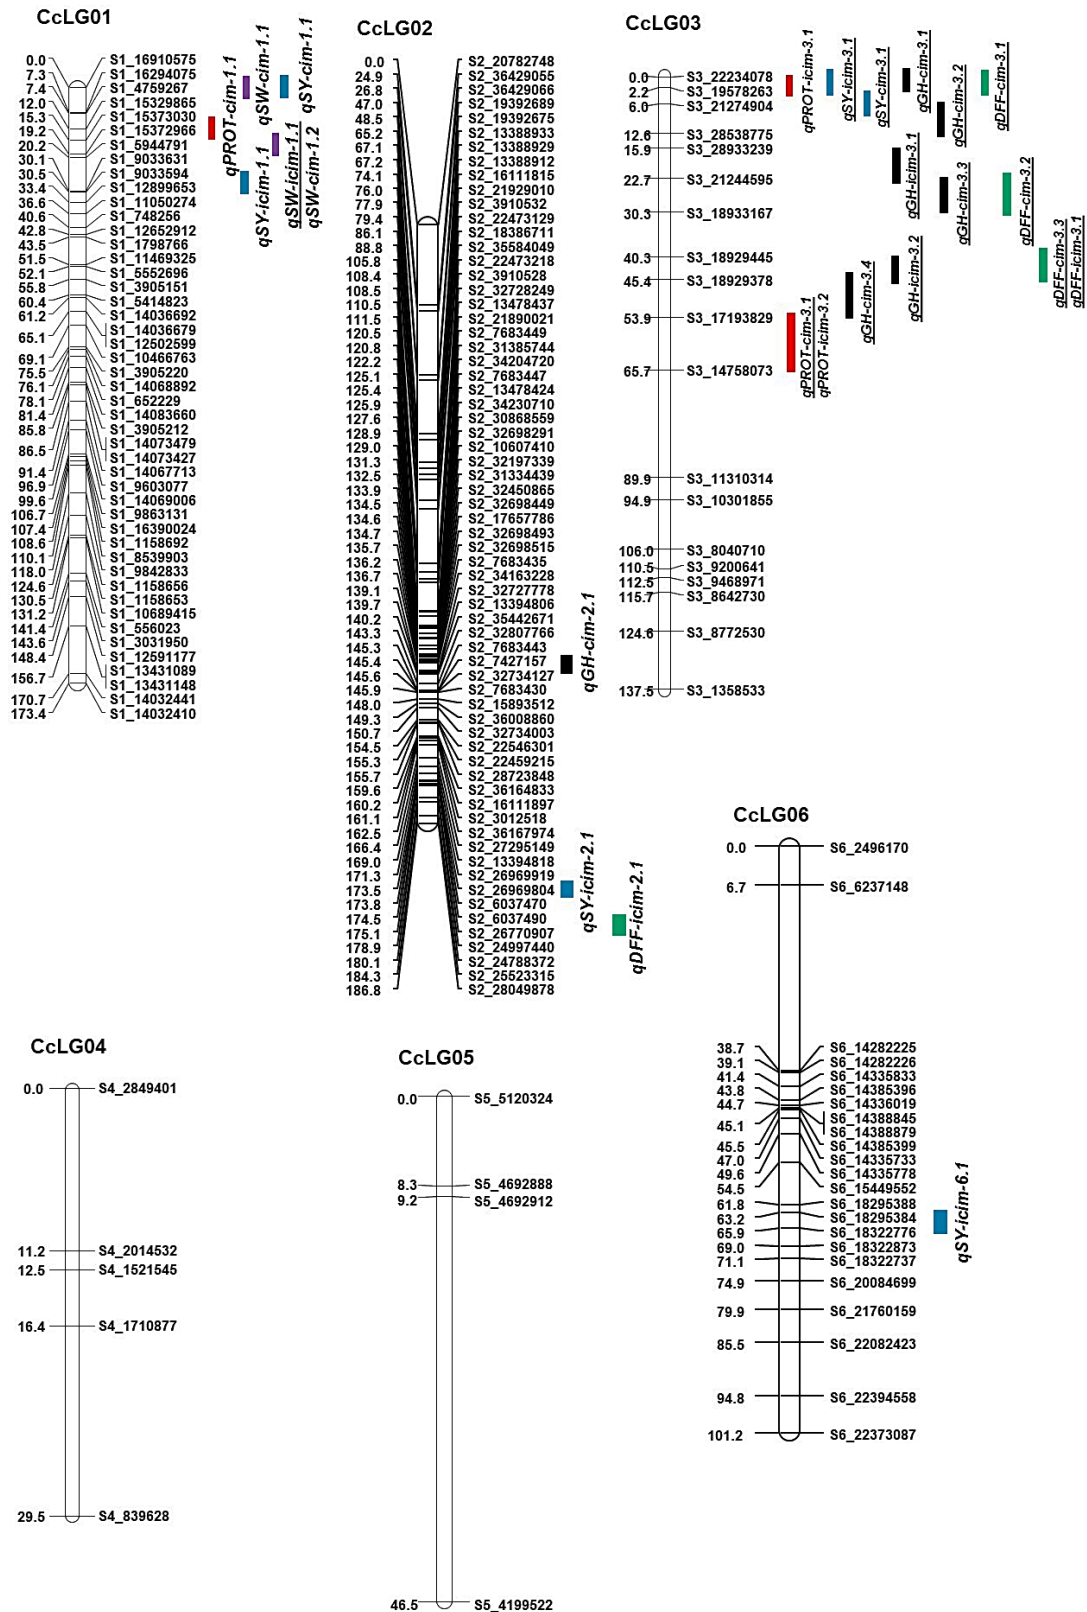



Supplementary Figure S2 (continued)

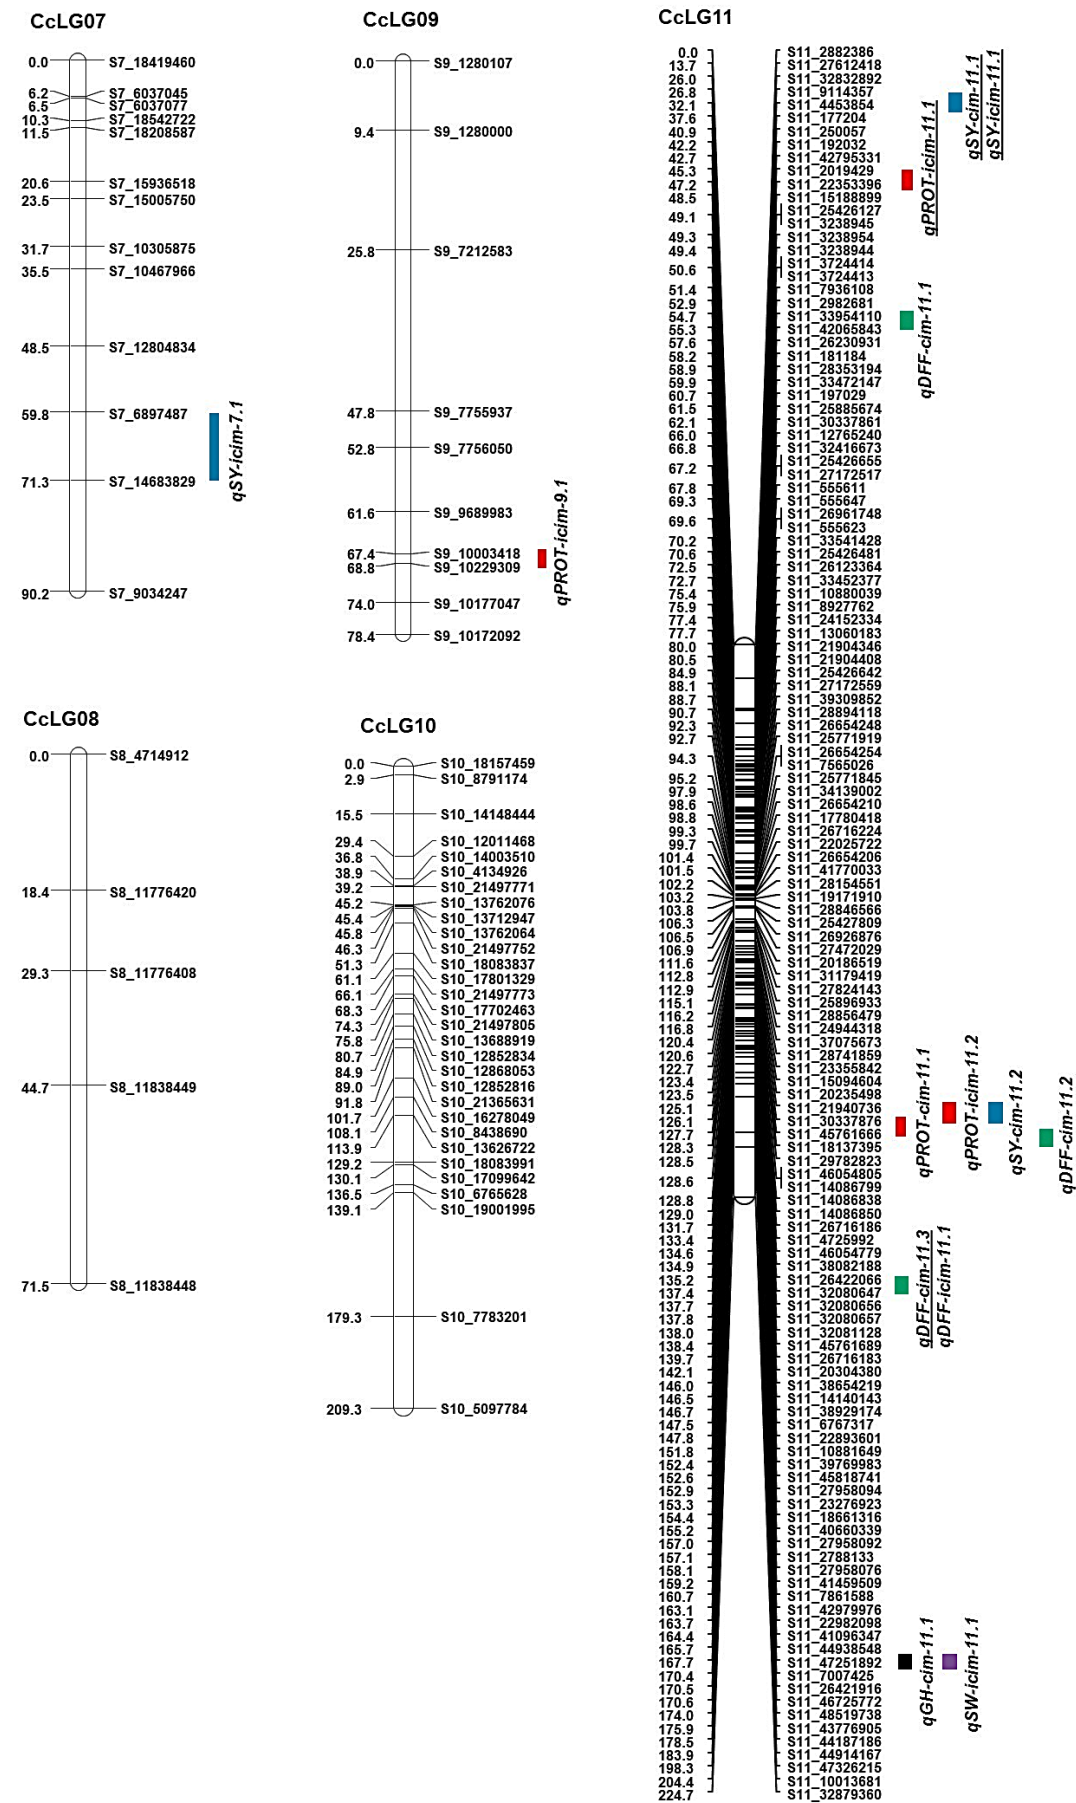

### Supplementary Figure S3. Genetic and QTL maps for Pop3 (HPL 24 × ICP 11605).

Markers are shown on right side of the linkage group while map distances are indicated on left side. QTLs for the different traits are indicated by different colored bars with red, purple, blue, black and green showing QTLs for seed protein content, seed weight, seed yield, growth habit and days to first flowering, respectively.

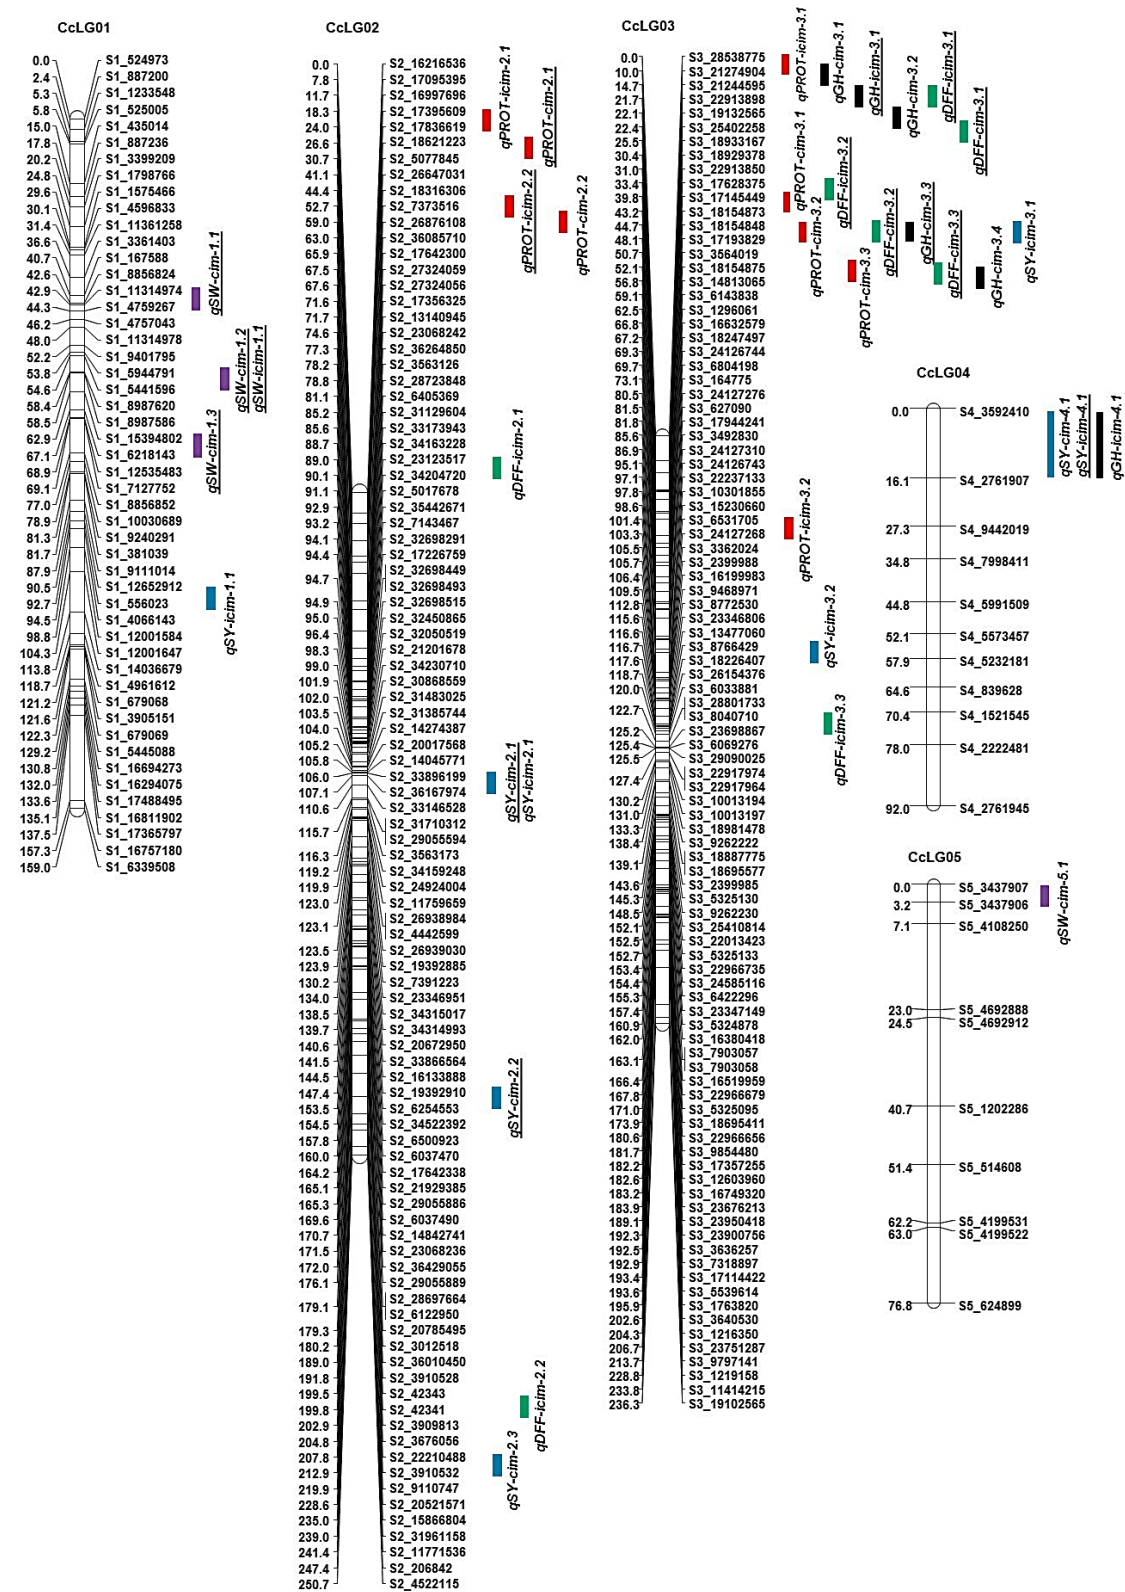

# Supplementary Figure S3 (continued)

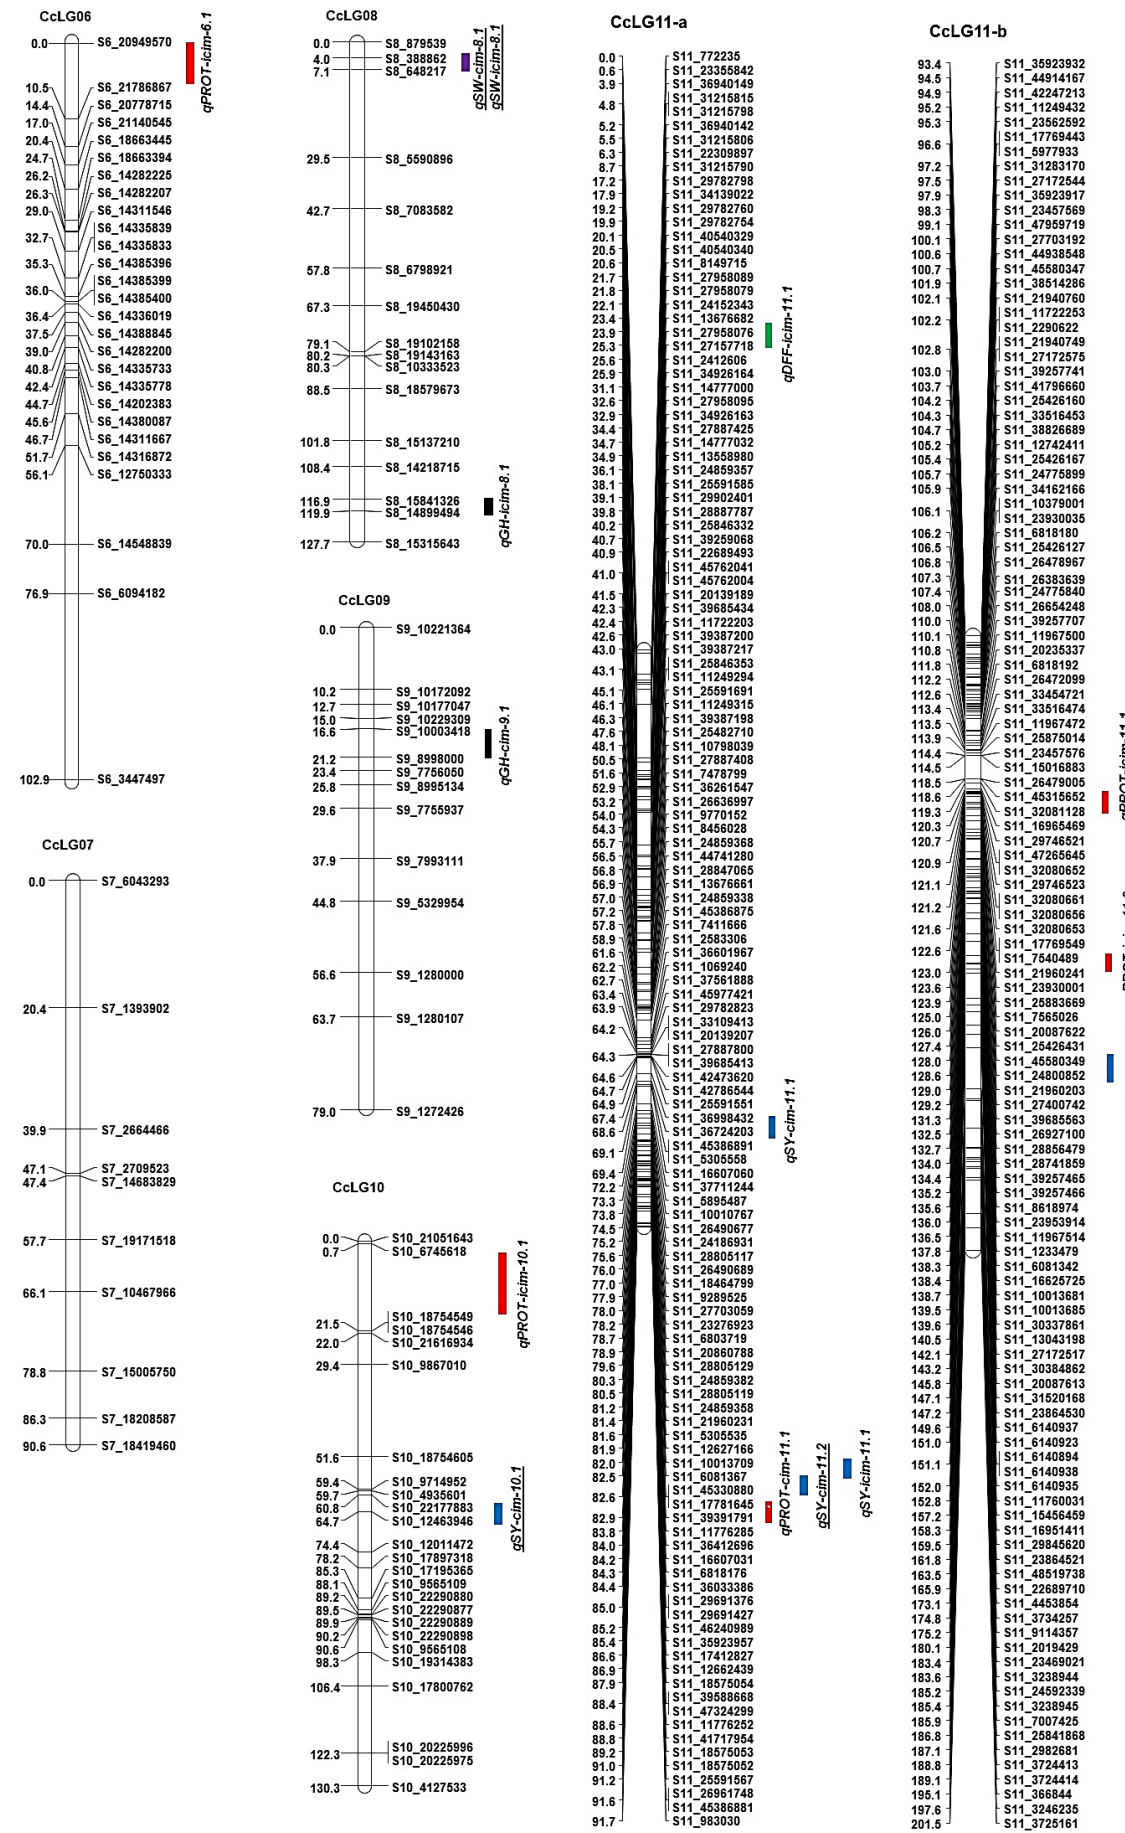

### Supplementary Figure S4. Genetic and QTL maps for Pop4 (HPL 24 × ICP 11605).

Markers are shown on right side of the linkage group while map distances are indicated on left side. QTLs for the different traits are indicated by different colored bars with red, purple, blue, black and green showing QTLs for seed protein content, seed weight, seed yield, growth habit and days to first flowering, respectively

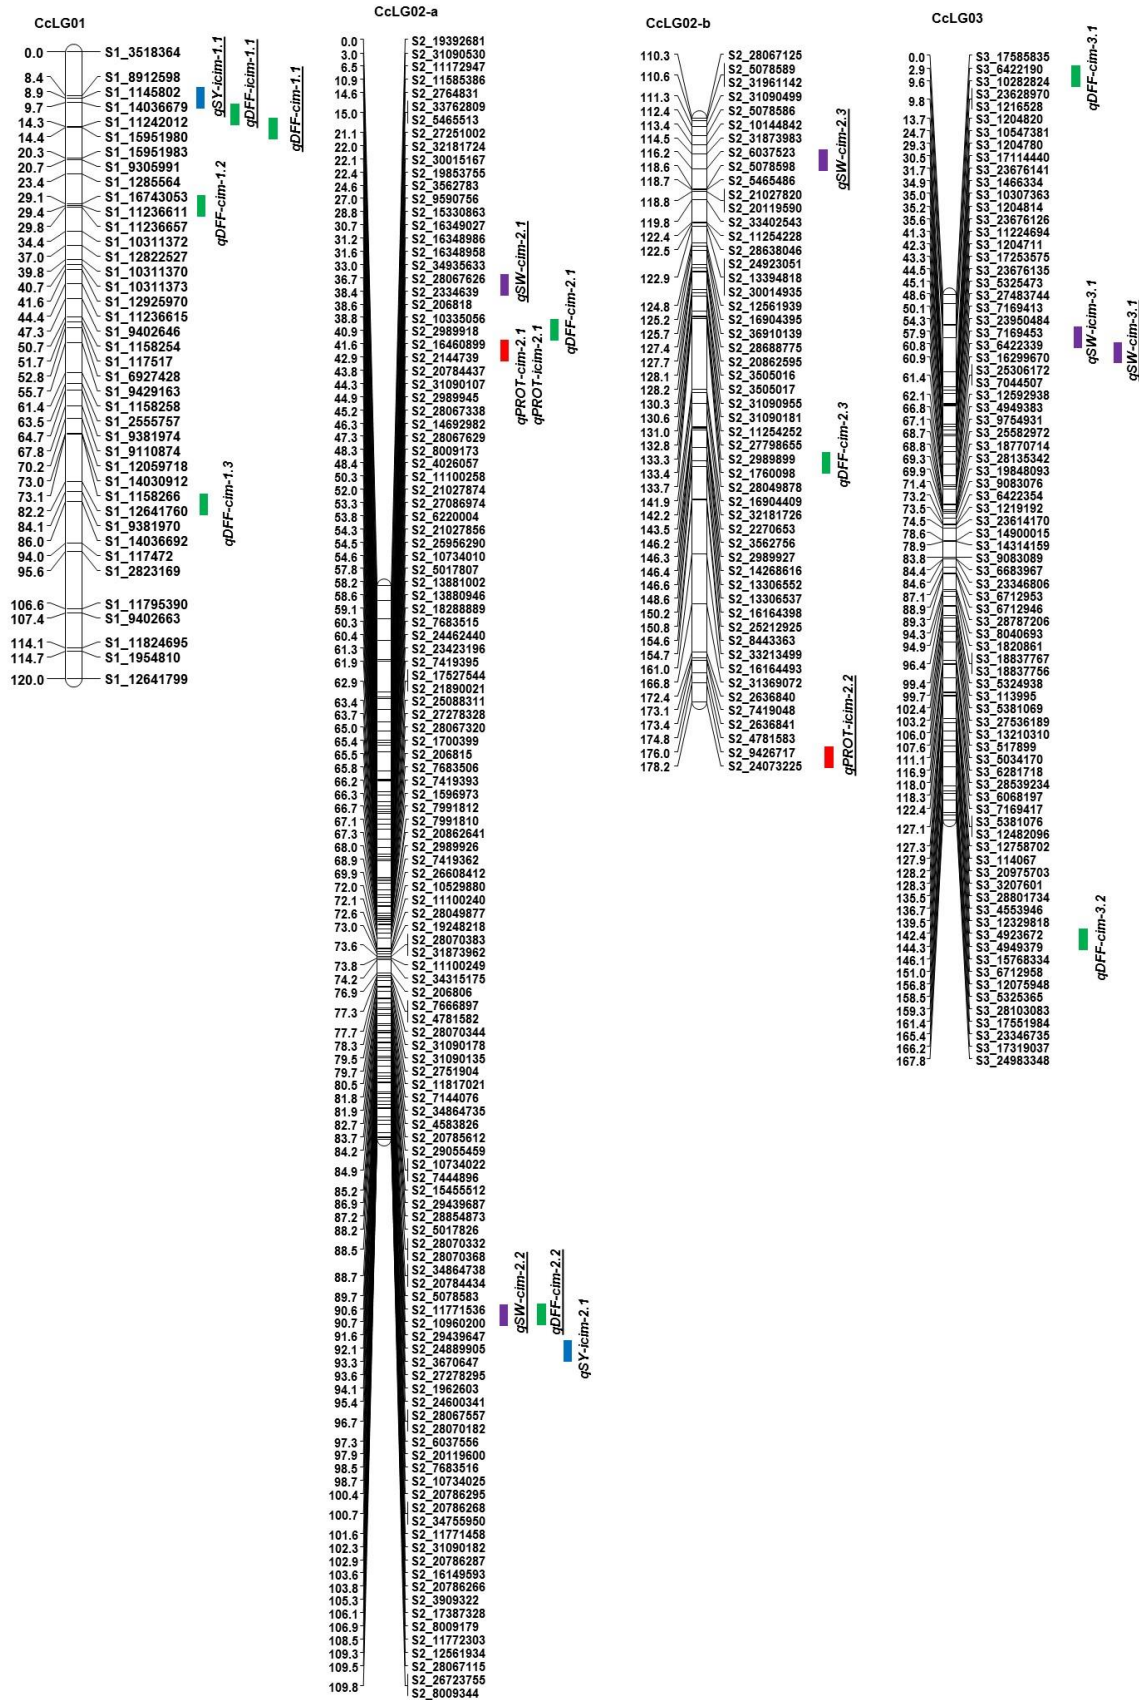

# Supplementary Figure S4 (continued)

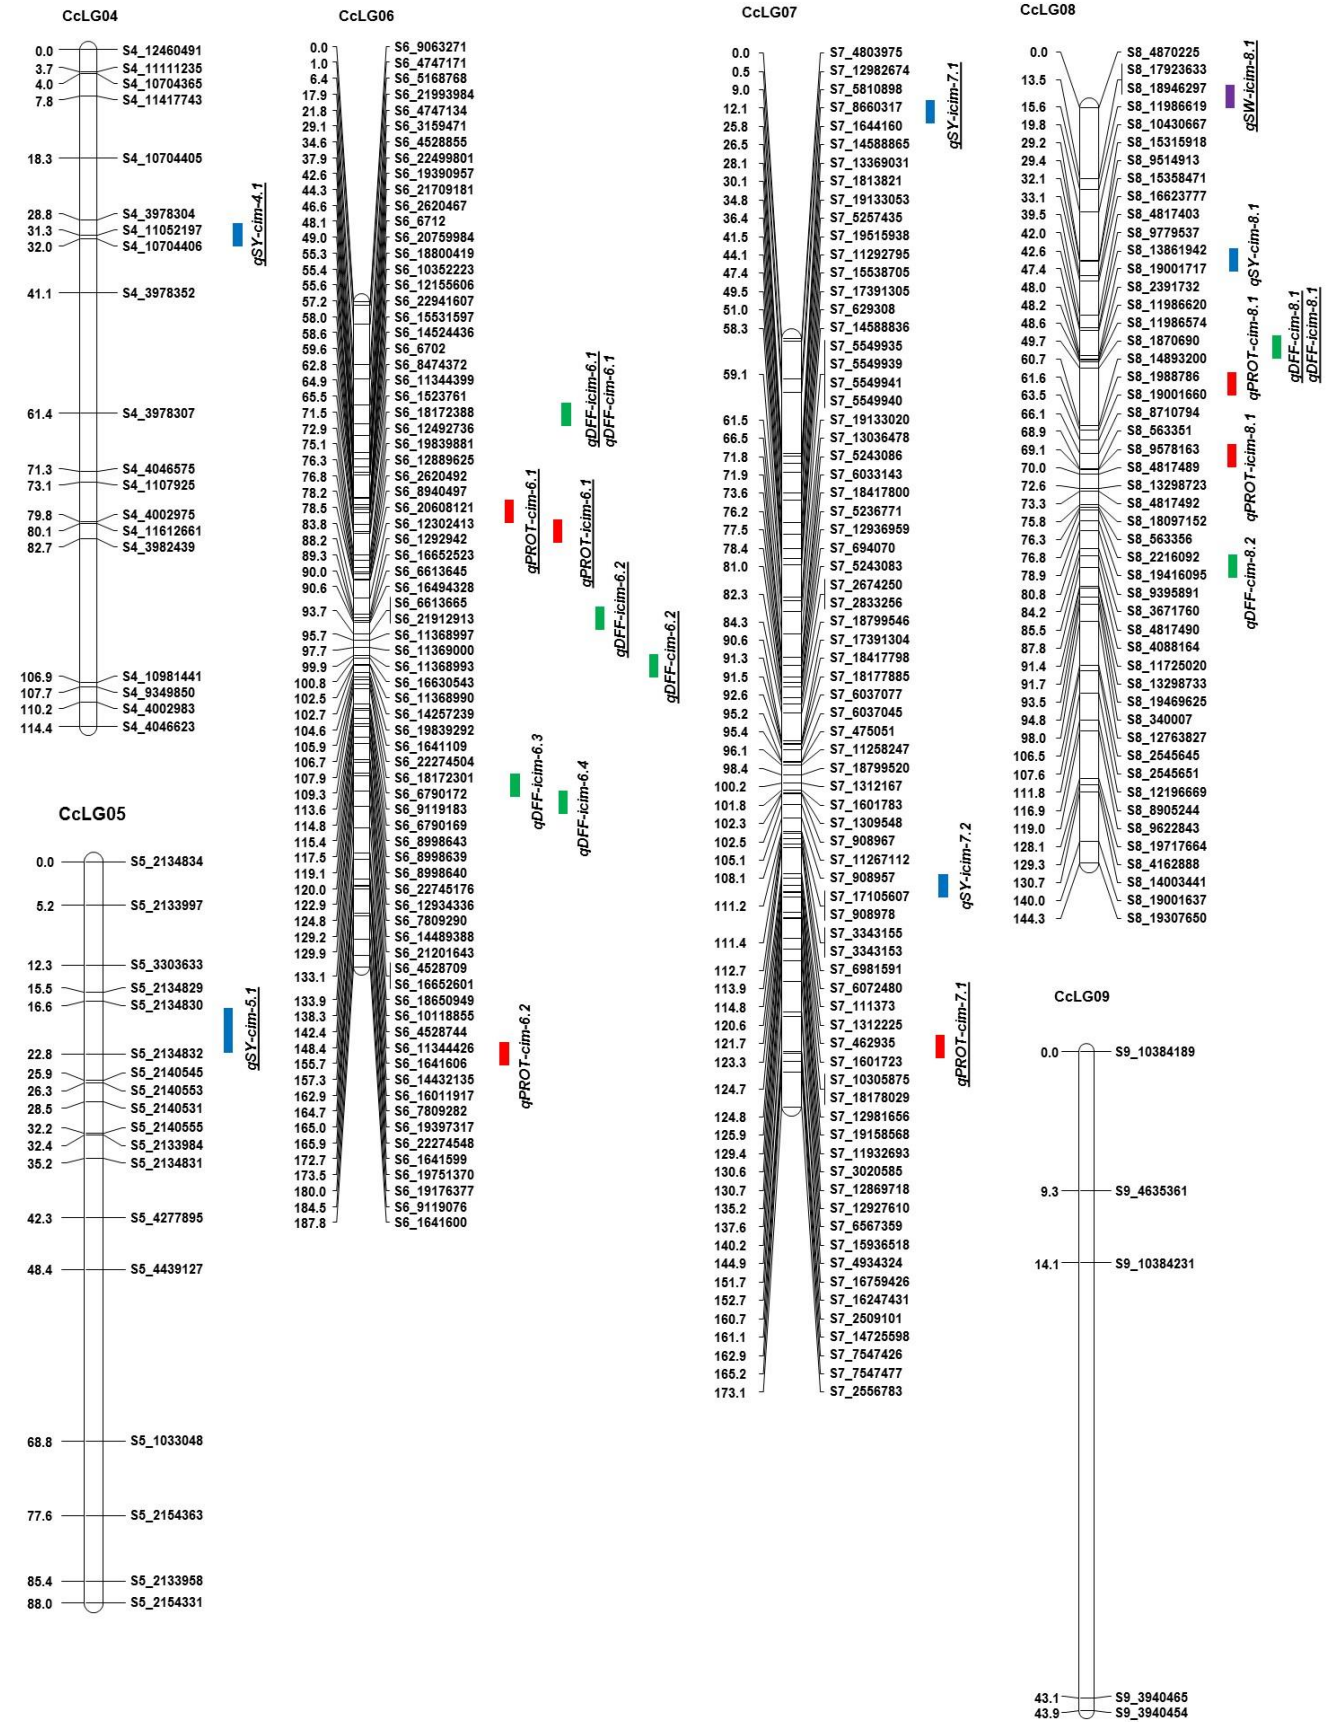



**Supplementary Figure S5. Genetic and QTL maps for Pop5 (ICP 5529 × ICP 11605).**

Markers are shown on right side of the linkage group while map distances are indicated on left side. QTLs for the different traits are indicated by different colored bars with red, purple, blue, black and green showing QTLs for seed protein content, seed weight, seed yield, growth habit and days to first flowering, respectively. Gene names are in parentheses;

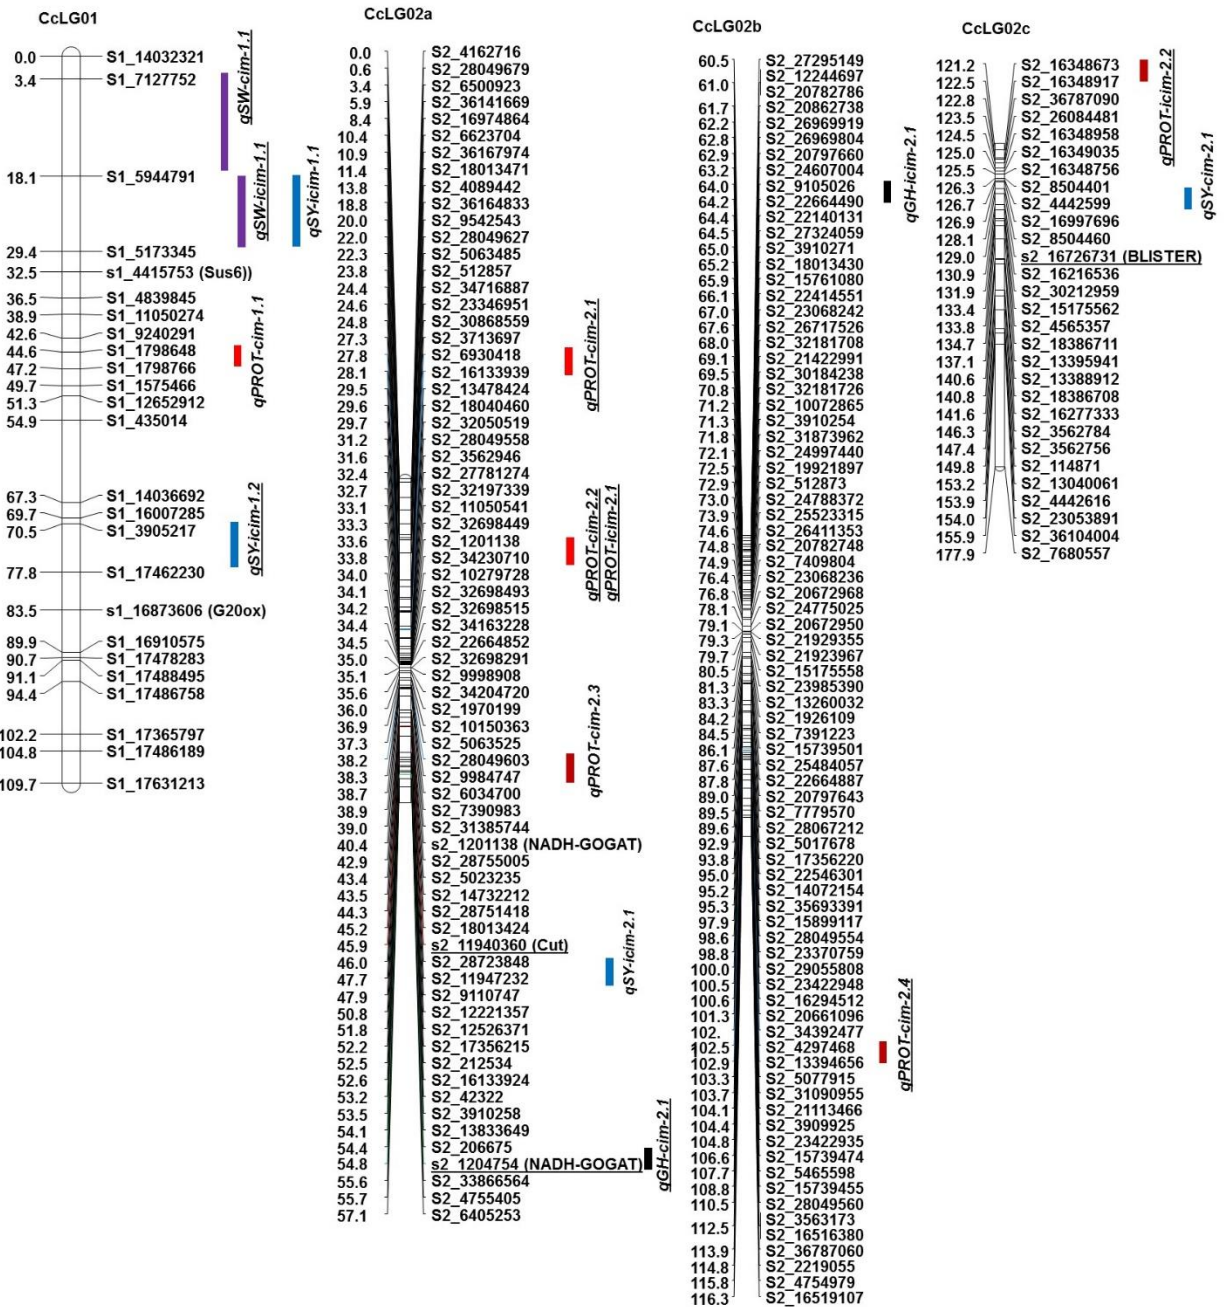





Supplementary Figure S5 (continued)

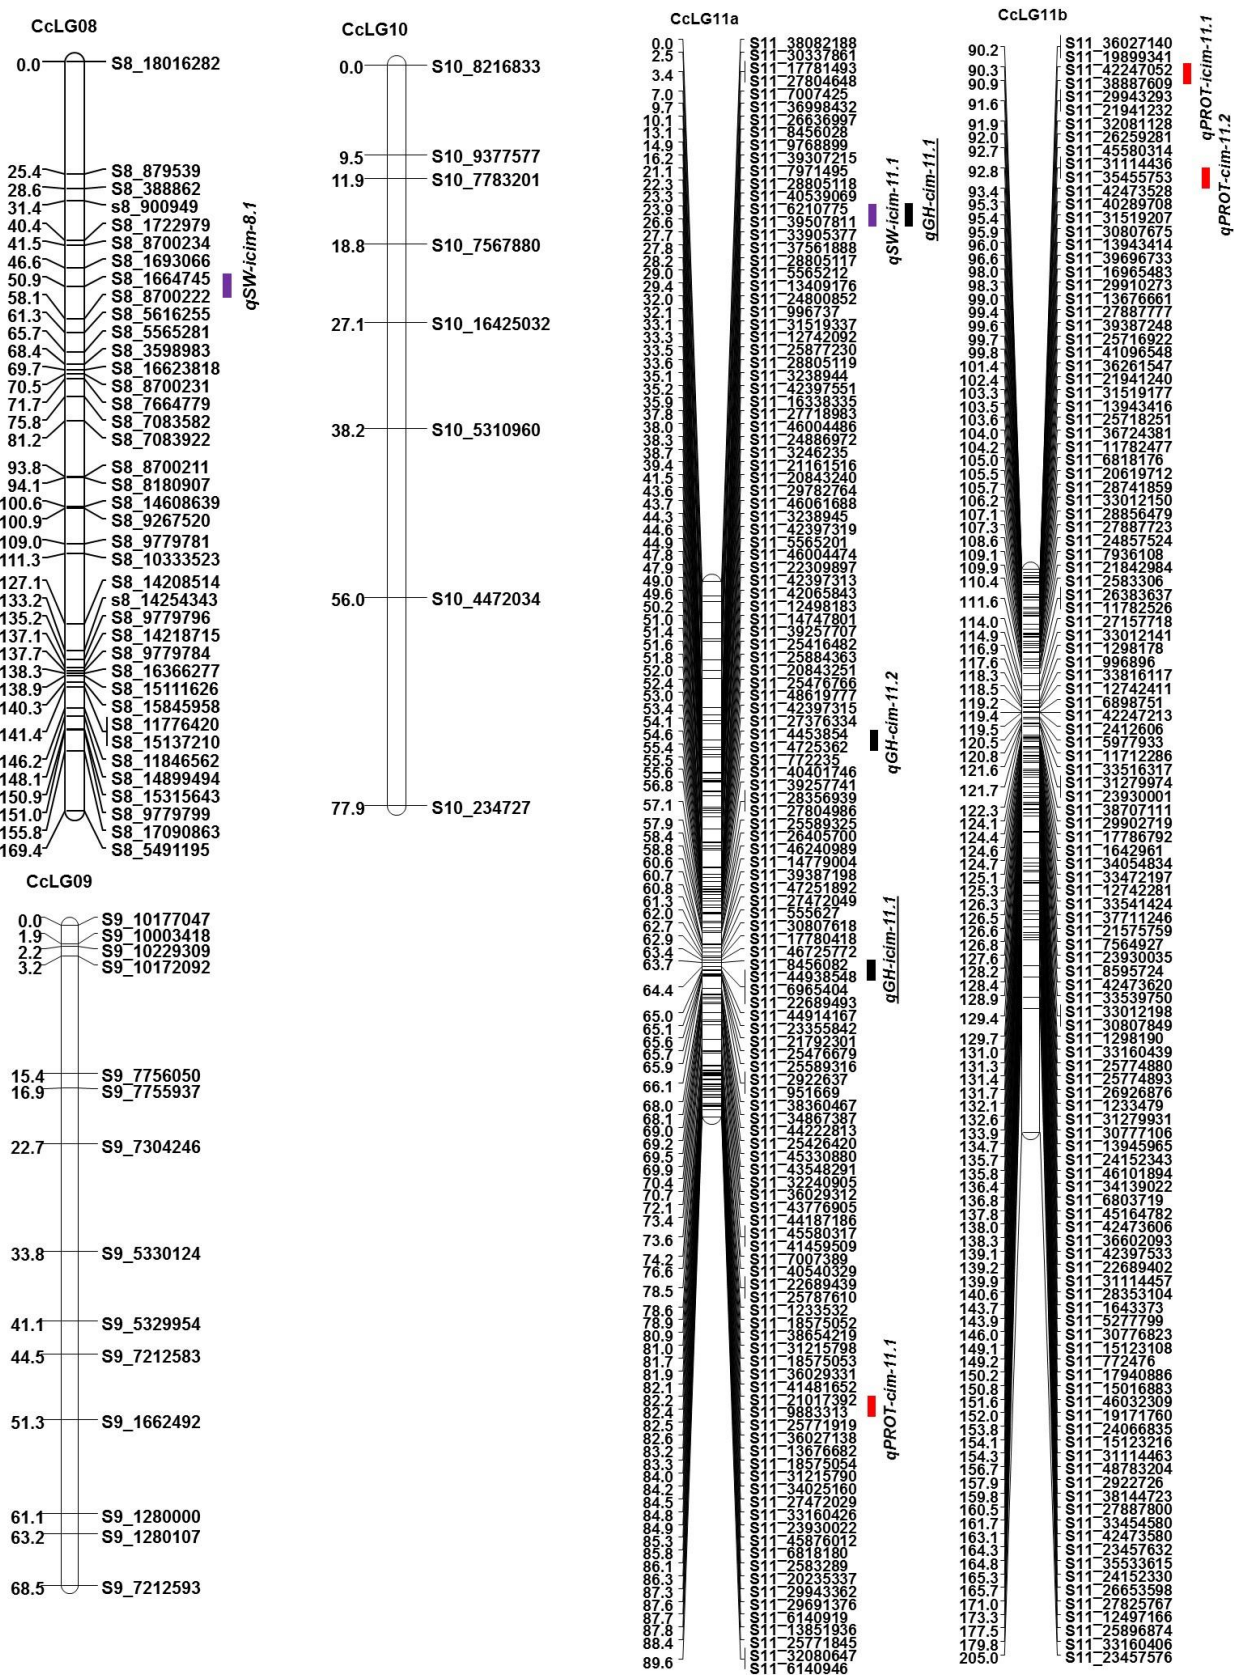

**Supplementary Figure S6. Charts depicting marker-based correspondences of consensus with individual genetic maps. a, b, c, d, e, f, g, h, i, j and k are CcLG01, CcLG02, CcLG03, CcLG04, CcLG05, CcLG06, CcLG07, CcLG08, CcL09, CcLG10 and CcLG11, respectively. Only common markers are included to visually assess the collinearity of marker orders and marker positions. Linkage groups were aligned together using comparative mapping programme CMap version 1.01**

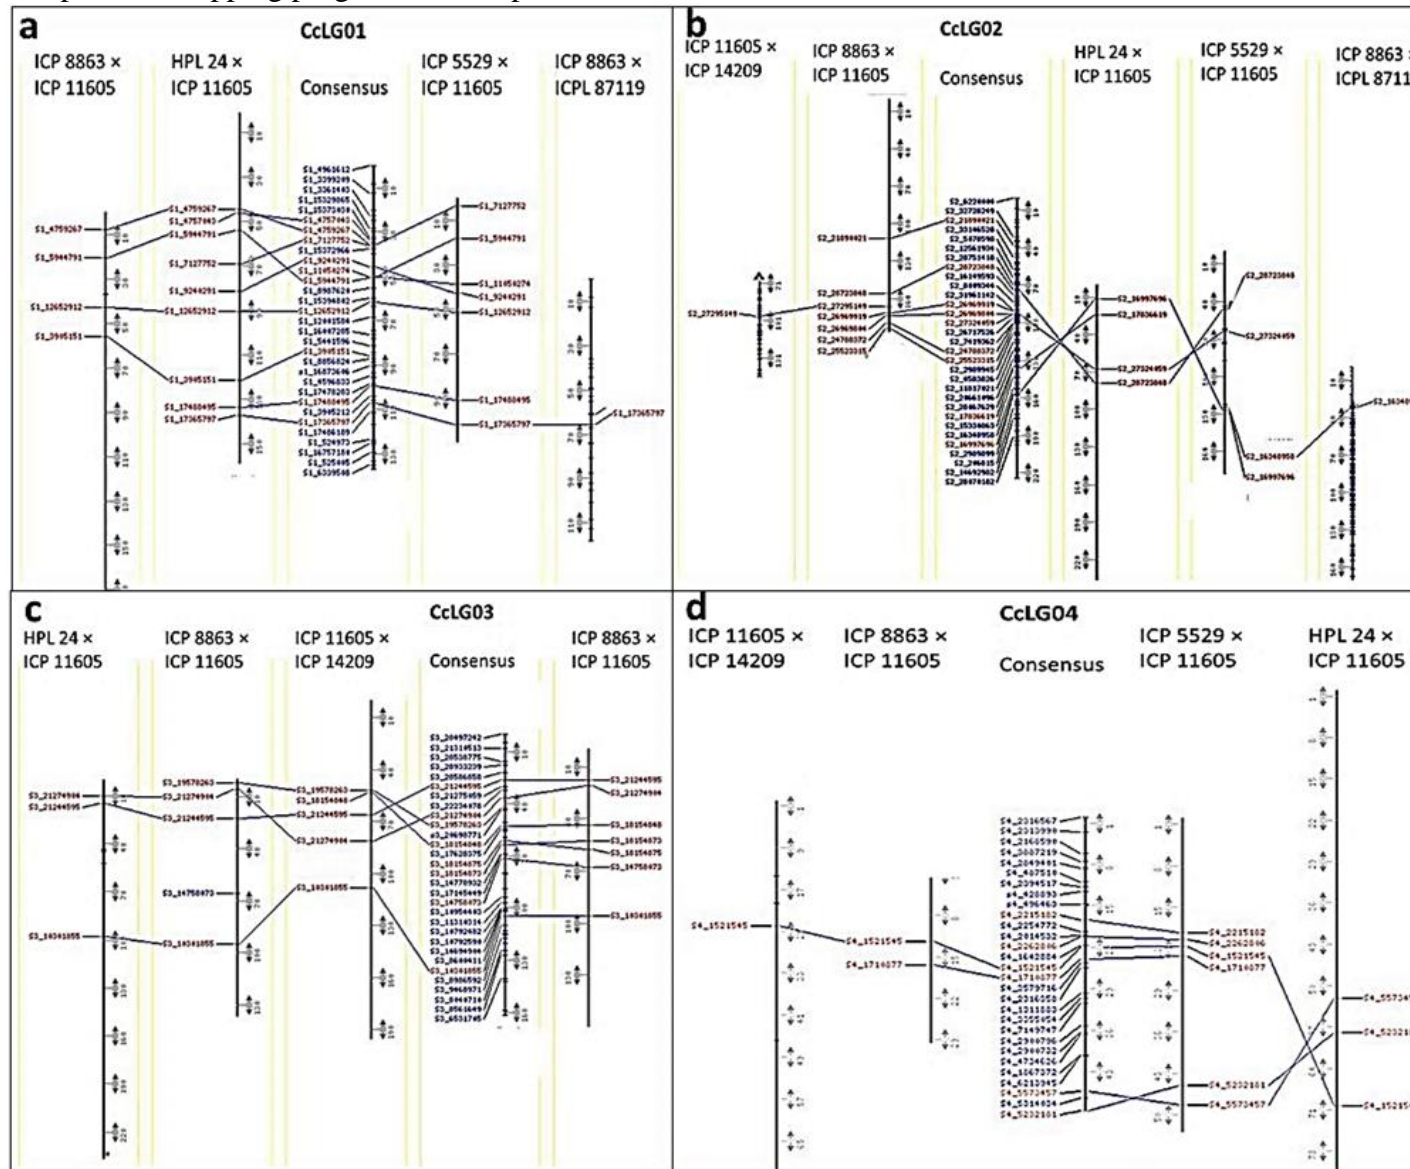

Supplementary Figure S6 (continued)

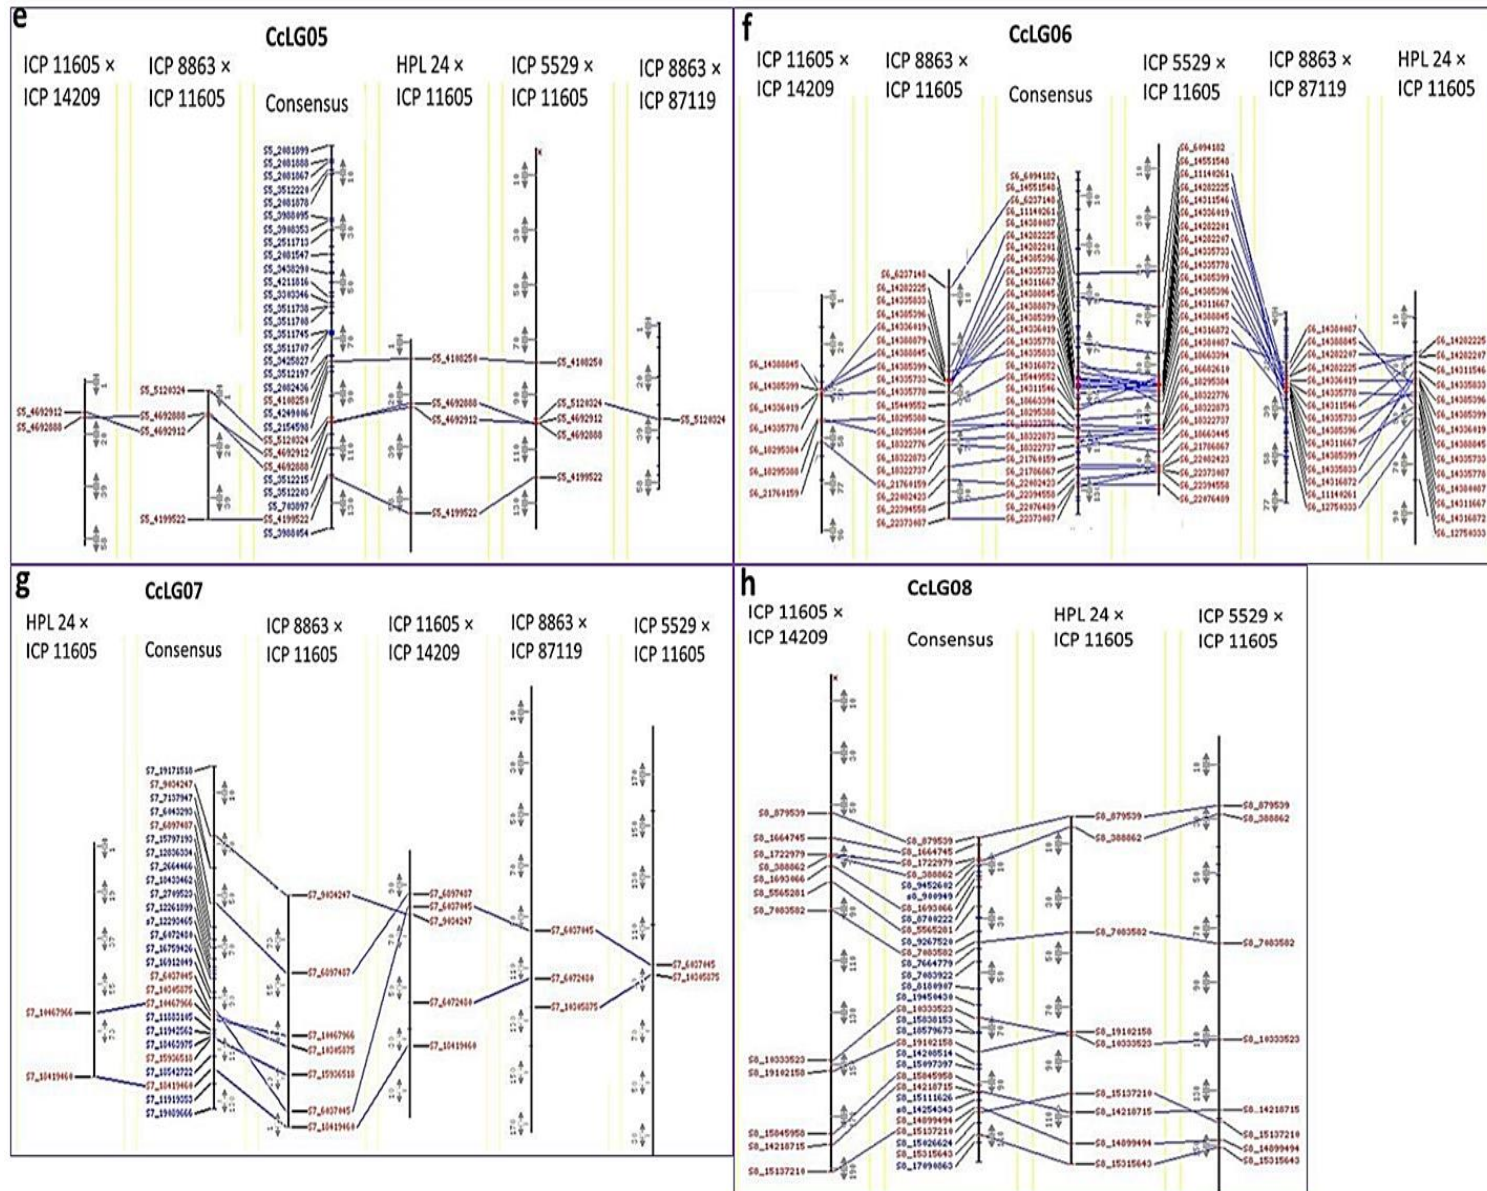



**Supplementary Figure S7. Consensus genetic and QTL maps.** Markers are shown on right side of the linkage group while map distances are indicated on left side. Markers unique to mapping populations, common between two, three and four mapping populations, have been shown by black, red, blue and green colours, respectively. QTLs for the different traits are indicated by colored bars with brown, green, grey, purple and red showing QTLs for GH, SY, DTFF, HSW and SPC, respectively. Source populations of projected QTLs are indicated by dots of different colours where yellow, blue, green, purple and black represent Pop1, Pop2, Pop3, Pop4 and Pop5, respectively. The position of the dot on the QTL bar indicates whether both or only one of the flanking markers were projected onto the consensus map. Where the dot lies at the center of the QTL bar it indicates that both flanking markers of the QTL are present, while if the dot lies either on the upper or lower part of the QTL bar it shows that only one marker closest to the dot was projected.

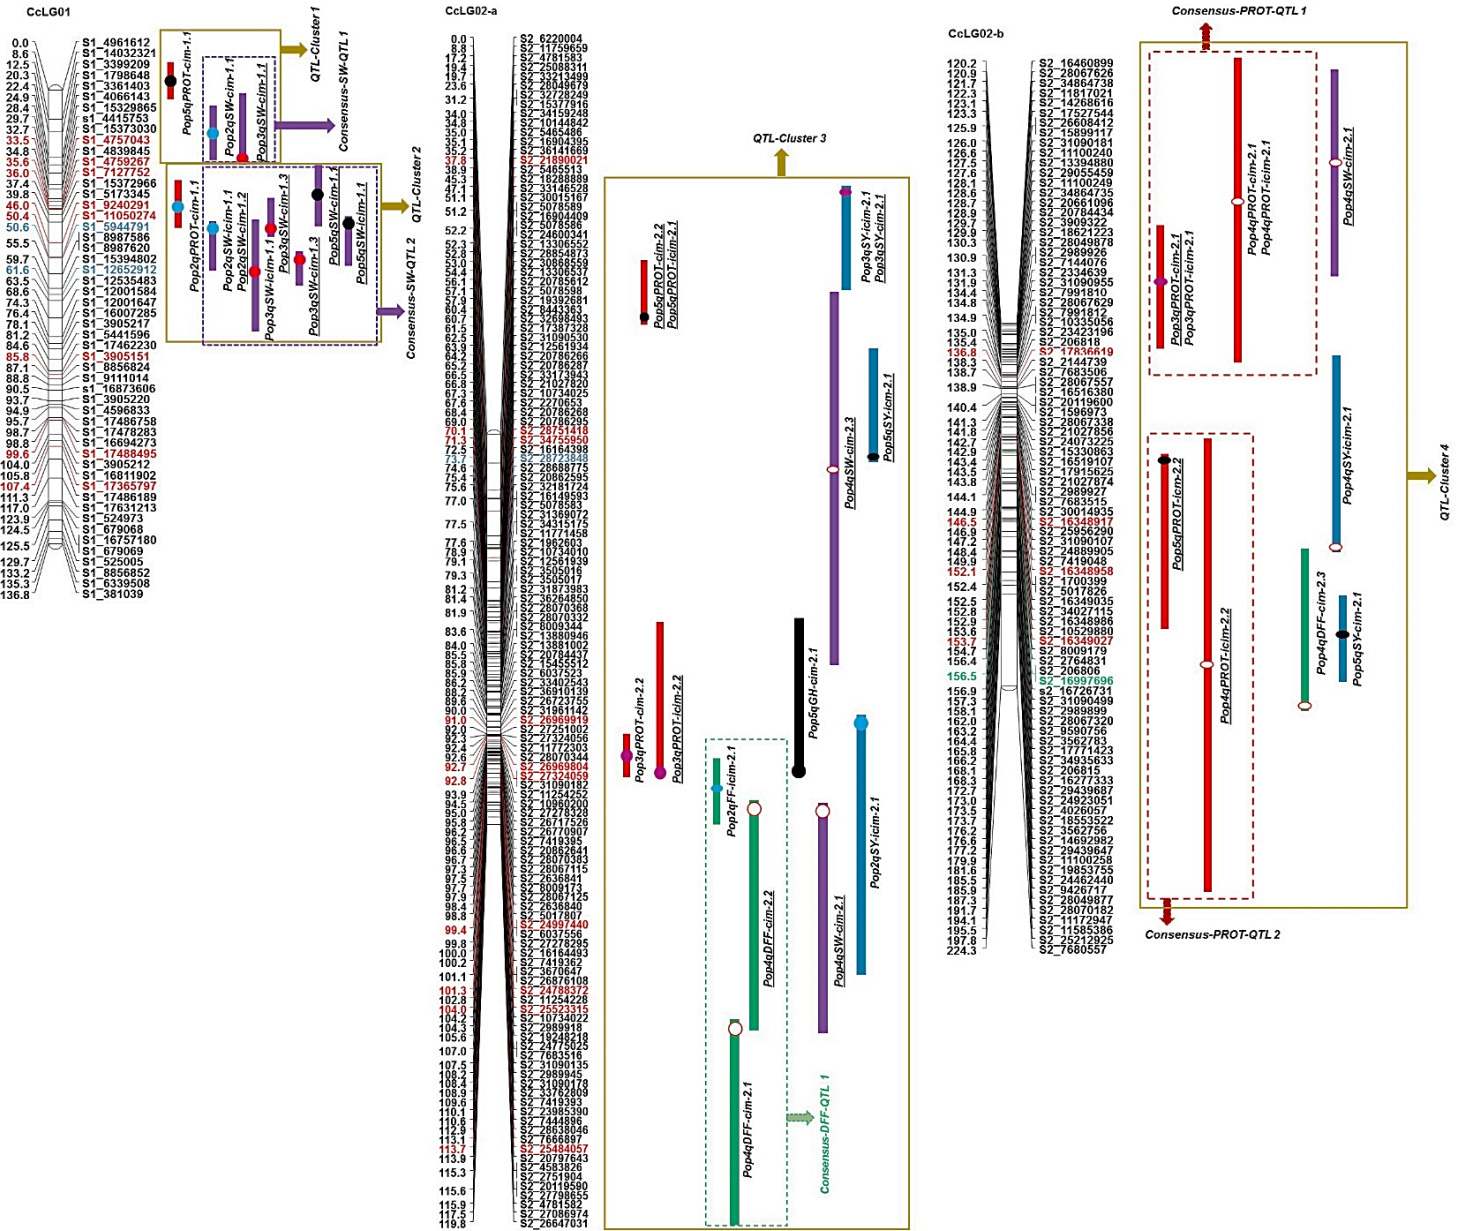

Supplementary Figure S7 (continued)

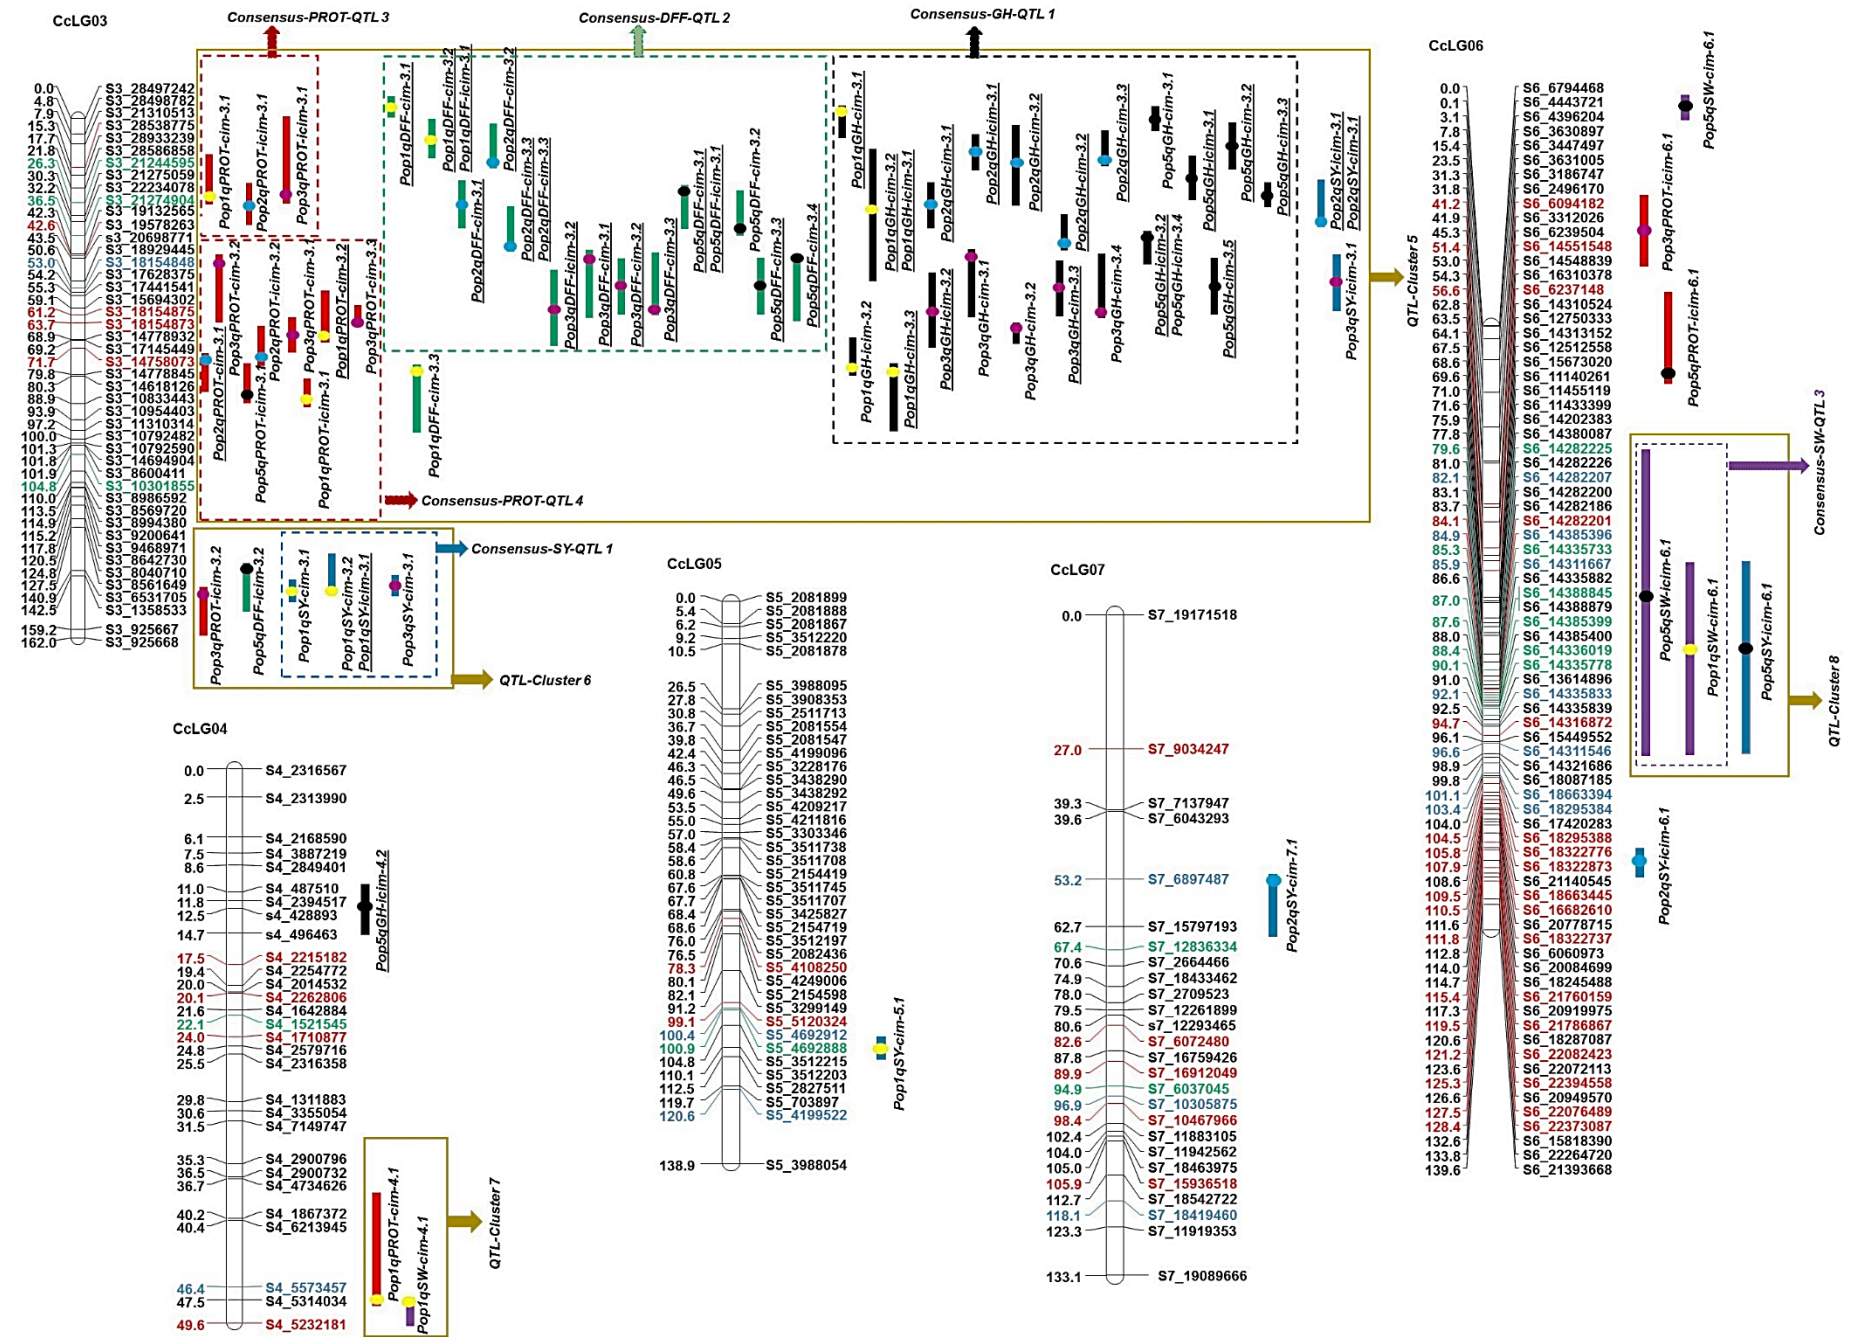



# Supplementary Figure S7 (continued)

CcLG11-b

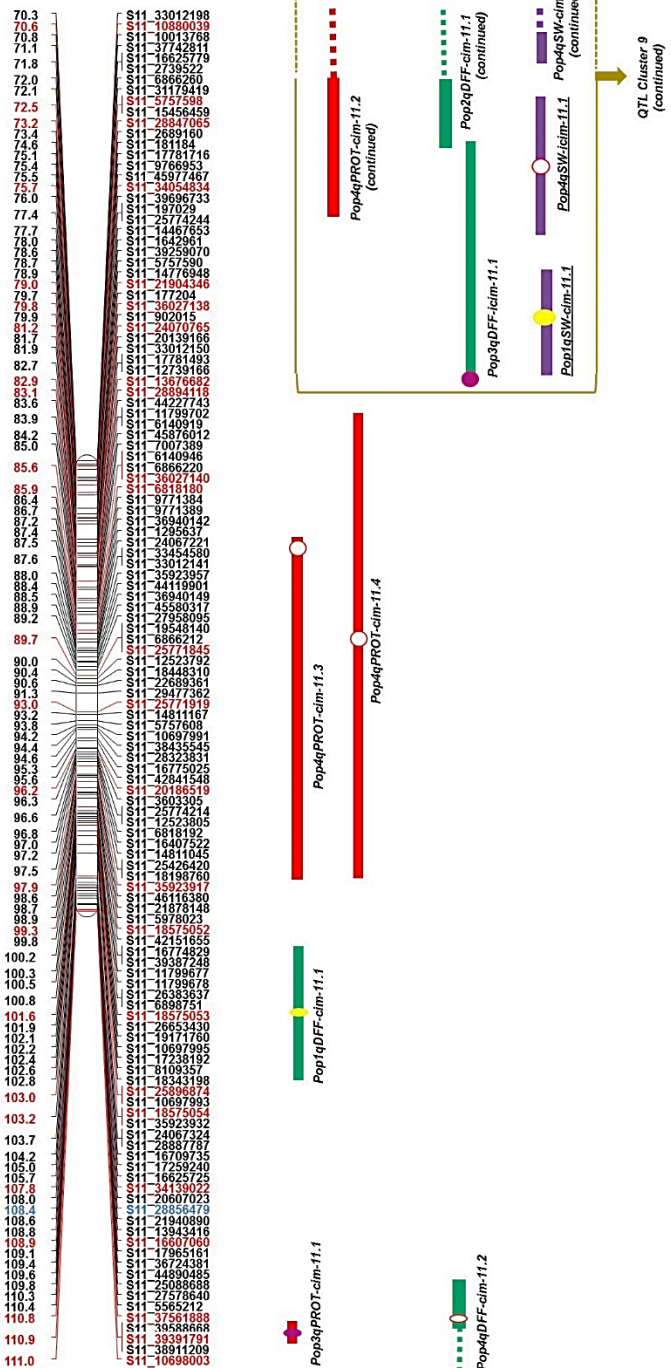

CcLG11-c

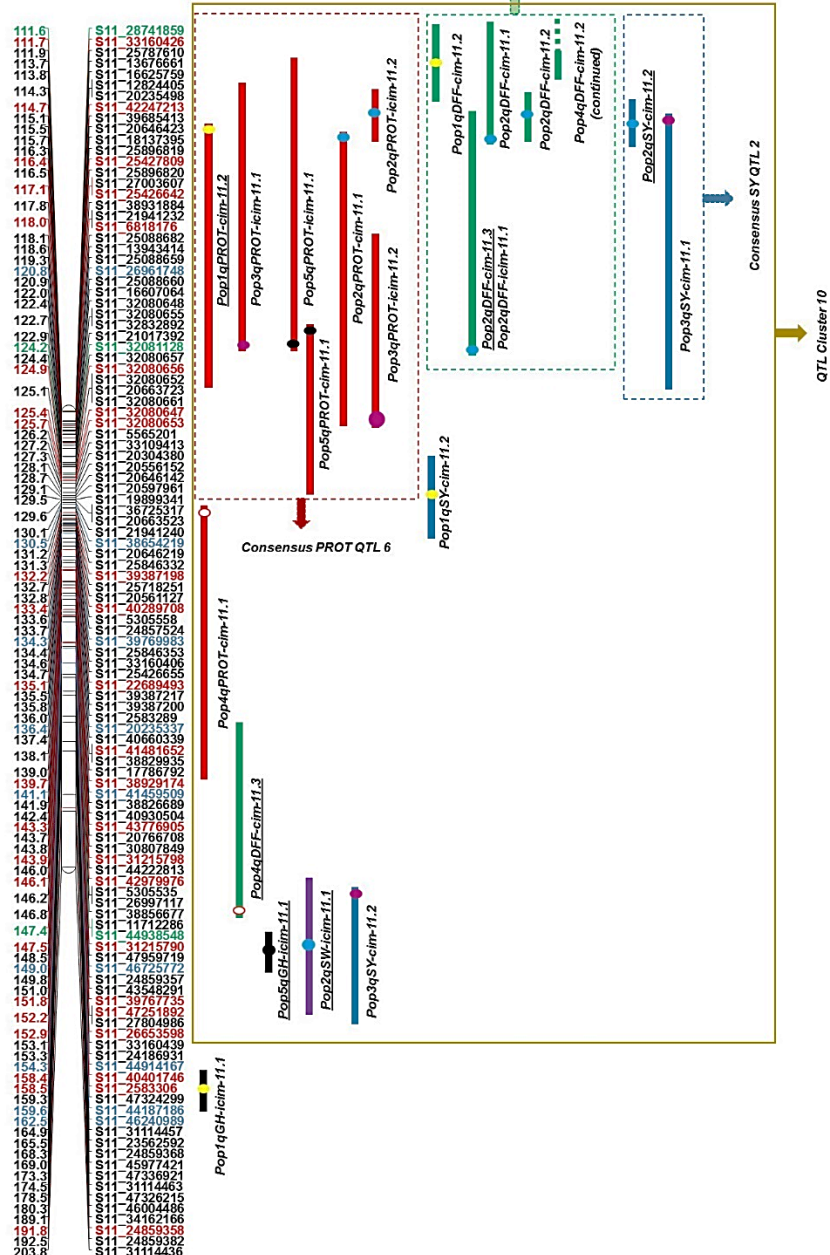

Supplement: 41598_2019_56903_MOESM1_ESM.pdf [file 41598_2019_56903_MOESM1_ESM.pdf]
